# Supplementary material
Source: PubMed Central journal article supplement (PMC5613887)
Supplement: DS_10.1177_0022034517726496.pdf [file DS_10.1177_0022034517726496.pdf]

## The Use of Variant Maps to Explore Domain-Specific Mutations of *FGFR1*

L.A. Lansdon, H.V. Bernabe, N. Nidey, J. Standley, M.J. Schnieders, and J.C. Murray

### Appendix

**Appendix Table 1.** Published cases of Hartsfield syndrome to date.

| Diagnosis     | Causal Gene  | Nucleotide Change | Amino Acid Change | Protein Domain | Sex          | Reference                                                                 |
|---------------|--------------|-------------------|-------------------|----------------|--------------|---------------------------------------------------------------------------|
| Hartsfield    | <i>FGFR1</i> | 494T>C            | L165S             | IgII           | M            | Vilian et al., 2009 "Patient 3";<br>Simonis et al., 2013                  |
| Hartsfield    | <i>FGFR1</i> | 572T>C            | L191S             | IgII           | M            | Simonis et al., 2013                                                      |
| Hartsfield    | <i>FGFR1</i> | 758A>C            | H253P             | AB             | M            | Takagi et al., 2016                                                       |
| Kallmann      | <i>FGFR1</i> | 1286T>A**         | V429E**           | TM             | M            | Villanueva et al., 2014                                                   |
| Hartsfield    | <i>FGFR1</i> | 1454G>T           | G485V             | TK             | Not Reported | Dubourg et al., 2016                                                      |
| Hartsfield    | <i>FGFR1</i> | 1459G>T           | G487C             | TK             | M            | Lansdon et al.                                                            |
| Hartsfield    | <i>FGFR1</i> | 1460G>A           | G487D             | TK             | M            | Hong et al., 2016                                                         |
| Hartsfield    | <i>FGFR1</i> | 1468G>C           | G490R             | TK             | M            | Vilian et al., 2009 "Patient 5";<br>Simonis et al., 2013                  |
| Hartsfield    | <i>FGFR1</i> | 1468G>C           | G490R             | TK             | Not Reported | Dubourg et al., 2016                                                      |
| Hartsfield    | <i>FGFR1</i> | 1867G>T           | D623Y             | TK             | F            | Simonis et al., 2013                                                      |
| Hartsfield    | <i>FGFR1</i> | 1869C>G(A)        | D623E             | TK             | Not Reported | Hong et al., 2016                                                         |
| Hartsfield    | <i>FGFR1</i> | 1880G>C           | R627T             | TK             | M            | Keaton et al., 2010 "Patient 13";<br>Dhamija et al., 2014 "Older brother" |
| Hartsfield    | <i>FGFR1</i> | 1880G>C           | R627T             | TK             | M            | Dhamija et al., 2014 "Younger brother"                                    |
| Hartsfield    | <i>FGFR1</i> | 1880G>C           | R627T             | TK             | M            | Oliver et al., 2017 "Oldest son"                                          |
| Hartsfield    | <i>FGFR1</i> | 1880G>C           | R627T             | TK             | M            | Oliver et al., 2017 "Middle son"                                          |
| Hartsfield    | <i>FGFR1</i> | 1880G>C           | R627T             | TK             | M            | Oliver et al., 2017 "Youngest son"                                        |
| Hartsfield    | <i>FGFR1</i> | 1883A>G           | N628S             | TK             | M            | Prasad et al., 2016                                                       |
| Ectrodactyly- | <i>FGFR1</i> | 1884T>G           | N628K             | TK             | M            | Van Maldergem et al., 1992;                                               |

|                                               |                                                             |                    |                    |    |   |                                                          |
|-----------------------------------------------|-------------------------------------------------------------|--------------------|--------------------|----|---|----------------------------------------------------------|
| Ectodermal Dysplasia-Clefting Syndrome        |                                                             |                    |                    |    |   | Vilian et al., 2009 "Patient 2";<br>Simonis et al., 2013 |
| Hartsfield                                    | <i>FGFR1</i>                                                | 1921G>A            | D641N              | TK | F | Hong et al., 2016                                        |
| Hartsfield                                    | <i>FGFR1</i>                                                | 2174G>A            | C725Y              | TK | M | Vilian et al., 2009 "Patient 4";<br>Simonis et al., 2013 |
| Same condition as reported in Hartsfield 1984 | Balanced reciprocal translocation (46,XY,t(2:4)(q14.2,q35)) | N/A                | N/A                |    | M | Corona-Rivera et al., 2000                               |
| Hartsfield                                    | Unknown                                                     | No change detected | No change detected |    | F | Simonis et al., 2013                                     |
| Hartsfield                                    | Unknown                                                     | Not tested         | Not tested         |    | M | Hartsfield 1984                                          |
| Same condition as reported in Hartsfield 1984 | Unknown                                                     | Not tested         | Not tested         |    | M | Young et al., 1992                                       |
| Same condition as reported in Hartsfield 1984 | Unknown                                                     | Not tested         | Not tested         |    | M | Imaizumi et al., 1998                                    |
| Same condition as reported in Hartsfield 1984 | Unknown                                                     | Not tested         | Not tested         |    | M | Abdel-Meguid and Ashour 2001                             |
| Unknown                                       | Unknown                                                     | Not tested         | Not tested         |    | M | Koing et al., 2003                                       |
| Hartsfield                                    | Unknown                                                     | Not tested         | Not tested         |    | M | Vilian et al., 2009 "Patient 1"                          |
| Hartsfield                                    | Unknown                                                     | Not tested         | Not tested         |    | M | Zechi-Ceide et al., 2009                                 |
| Hartsfield                                    | Unknown                                                     | Not tested         | Not tested         |    | M | Metwalley Kalil et al., 2012                             |
| Hartsfield                                    | Unknown                                                     | Not tested         | Not tested         |    | F | Keaton et al., 2010                                      |
| Hartsfield                                    | Unknown                                                     | Not tested         | Not tested         |    | F | Keaton et al., 2010                                      |

\*\*indicates biallelic variants (IgII – immunoglobulin-like 2 domain; AB – acidic box; TK – tyrosine kinase domain)

**Appendix Table 2.** Detailed phenotypic description of all individuals with Hartsfield Syndrome and detected variants in *FGFR1*.

| Reference                                                                               | Sex | Nucleotide Change | Amino Acid Change | Protein Domain | HS             | CHH/KS | CL/P | Malformed Ears | Hearing Loss | Limb Defects   | ID/DD | CCA         | HPE |
|-----------------------------------------------------------------------------------------|-----|-------------------|-------------------|----------------|----------------|--------|------|----------------|--------------|----------------|-------|-------------|-----|
| Vilian et al., 2009 "Patient 3";<br>Simonis et al., 2013                                | M   | 494T>C            | L165S             | IgII           | x              | x      | x    |                |              | ECC (H/F)      | x     | x           | x   |
| Simonis et al., 2013                                                                    | M   | 572T>C            | L191S             | IgII           | x              |        |      |                |              | S;<br>ECC(H/F) | x     | x           | x   |
| Takagi et al., 2016                                                                     | M   | 758A>C            | H253P             | AB             | x              | x      | x    |                |              | ECC (H)        | mild  |             | x   |
| Villanueva et al., 2014                                                                 | M   | 1286T>A**         | V429E**           | TM             | x              | x      |      |                |              | ECC (H/F)      |       | hypoplastic |     |
| Dubourg et al., 2016                                                                    | ?   | 1454G>T           | G485V             | TK             | x <sup>1</sup> |        |      |                |              |                |       |             |     |
| Lansdon et al.                                                                          | M   | 1459G>T           | G487C             | TK             | x              | x      | x    | x              | x            | ECC (H/F)      | x     | x           | x   |
| Hong et al., 2016                                                                       | M   | 1460G>A           | G487D             | TK             | x              | x      | x    |                |              | ECC (F)        | x     | x           | x   |
| Vilian et al., 2009 "Patient 5";<br>Simonis et al., 2013                                | M   | 1468G>C           | G490R             | TK             | x              | x      | x    |                |              | ECC (H/F)      | x     |             | x   |
| Dubourg et al., 2016                                                                    | ?   | 1468G>C           | G490R             | TK             | x <sup>1</sup> |        |      |                |              |                |       |             |     |
| Simonis et al., 2013                                                                    | F   | 1867G>T           | D623Y             | TK             | x              | x      |      |                |              | ECC (H)        | mild  | x           | x   |
| Hong et al., 2016                                                                       | ?   | 1869C>G(A)        | D623E             | TK             | x              | x      |      |                |              | ECC (H/F)      |       |             | x   |
| Keaton et al., 2010 "Patient 13";<br>Dhamija et al., 2014 "Older brother"               | M   | 1880G>C           | R627T             | TK             | x              | x      | x    | x              |              | ECC            |       |             | x   |
| Dhamija et al., 2014 "Younger brother"                                                  | M   | 1880G>C           | R627T             | TK             | x              | x      | x    |                |              | ECC            |       |             | x   |
| Oliver et al., 2017 "Oldest son"                                                        | M   | 1880G>C           | R627T             | TK             | x              |        | x    | microtia       | x            | ECC (H/F)      | x     |             | x   |
| Oliver et al., 2017 "Middle son"                                                        | M   | 1880G>C           | R627T             | TK             | x              |        | x    | x              | x            | ECC (H/F)      |       |             | x   |
| Oliver et al., 2017 "Youngest son"                                                      | M   | 1880G>C           | R627T             | TK             | x              |        | x    | x              |              | ECC (H/F)      |       |             | x   |
| Prasad et al., 2016                                                                     | M   | 1883A>G           | N628S             | TK             | x              |        | x    | x              |              | C; ECC (H/F)   |       |             | x   |
| Van Maldergem et al., 1992;<br>Vilian et al., 2009 "Patient 2";<br>Simonis et al., 2013 | M   | 1884T>G           | N628K             | TK             | x              |        | x    |                |              | ECC (H/F)      | x     | x           | x   |
| Hong et al., 2016                                                                       | F   | 1921G>A           | D641N             | TK             | x              |        | x    | x              |              | S (H); O (F)   | x     |             | x   |
| Vilian et al., 2009 "Patient 4";<br>Simonis et al., 2013                                | M   | 2174G>A           | C725Y             | TK             | x              |        |      |                |              | ECC (H/F)      | mild  | x           | x   |

(HS – Hartsfield syndrome; CHH/KS – nonsomic congenital hypogonadotropic hypogonadism/Kallmann syndrome; CL/P – cleft lip and/or palate; ID/DD – intellectual disability/developmental delay; HPE – holoprosencephaly; ECC – ectrodactyly; S – syndactyly; O – oligodactyly; H/F – indicates hands (H) or feet (F) affected; <sup>1</sup>additional phenotypes not reported; ? – not reported; \*\* – biallelic; IgII – immunoglobulin-like 2 domain; AB – acidic box; TK – tyrosine kinase domain)

**Appendix Table 3.** Published PubMed variants of *FGFR1* and corresponding diseases.

| Nucleotide Change | Amino Acid (Domain) | Benign or VUS               | CADD Phred <sup>3</sup> | HS | PS/OGD | ECCL | SOD | CHH/KS | DA | CL/P | ME | HL | LD | CS | ID/DD | CCA | HPE | CR | CR + LD | Reference                          |
|-------------------|---------------------|-----------------------------|-------------------------|----|--------|------|-----|--------|----|------|----|----|----|----|-------|-----|-----|----|---------|------------------------------------|
| -1G>A             | ?                   |                             |                         |    |        |      |     | x      |    |      |    |    |    |    |       |     |     |    |         | (Marcos, Sarfati et al. 2014)      |
| 6G>A              | W2*<br>(SP)         |                             | 42                      |    |        |      |     | x      |    |      |    |    |    |    |       |     |     |    |         | (Akkus, Kotan et al. 2017)         |
| 11G>A             | W4*<br>(SP)         |                             | 43                      |    |        |      |     | x      |    |      |    |    |    |    |       |     |     |    |         | (Laitinen, Vaaralahti et al. 2011) |
| 12G>A             |                     |                             |                         |    |        |      |     | x      |    |      |    |    |    |    |       |     |     |    |         | C. Dodé, unpublished               |
| 12G>T             | W4C<br>(SP)         | dbSNP                       | 16.14                   |    |        |      |     | x      |    |      |    |    |    |    |       |     |     |    |         | (Goncalves, Bastos et al. 2015)    |
| 27delC            | Frameshift<br>(SP)  |                             |                         |    |        |      |     | x      |    |      |    |    |    |    |       |     |     |    |         | (Qin, Gong et al. 2014)            |
| 47C>G             | A16G<br>(SP)        |                             | 18.06                   |    |        |      |     | x      |    |      |    |    |    |    |       |     |     |    |         | C. Dodé, unpublished               |
| 64C>A             | R22S<br>(SP)        | dbSNP,<br>EVS, 1KG,<br>ExAC | 14.85                   |    |        |      |     | x      |    |      |    |    |    |    |       |     |     |    |         | (Nair, Jadhav et al. 2016)         |
| 92-1G>C           | Splice site<br>(SP) |                             |                         |    |        |      |     | x      |    |      |    |    |    |    |       |     |     |    |         | (Akkus, Kotan et al. 2017)         |

|              |                                    |                     |       |  |  |  |  |   |  |  |  |  |  |  |  |  |  |  |                                                                                                                       |
|--------------|------------------------------------|---------------------|-------|--|--|--|--|---|--|--|--|--|--|--|--|--|--|--|-----------------------------------------------------------------------------------------------------------------------|
| 95dupA       | Frameshift<br>(SP)                 |                     |       |  |  |  |  | x |  |  |  |  |  |  |  |  |  |  | (Goncalves, Bastos et al. 2015)                                                                                       |
| 142G>A       | G48S<br>(lgl)                      |                     | 36    |  |  |  |  | x |  |  |  |  |  |  |  |  |  |  | (Trarbach, Costa et al. 2006)                                                                                         |
| 165_171del   | Frameshift <sup>1</sup> .<br>(lgl) |                     |       |  |  |  |  | x |  |  |  |  |  |  |  |  |  |  | (Laitinen, Vaaralahti et al. 2011, Hero, Laitinen et al. 2015)                                                        |
| 201_215dup15 | R68_Q72dup<br>(lgl)                |                     |       |  |  |  |  | x |  |  |  |  |  |  |  |  |  |  | (Shaw, Seminara et al. 2011)<br><br>(Costa-Barbosa, Balasubramanian et al. 2013)                                      |
| 208G>C       | G70R<br>(lgl)                      | dbSNP,<br>EVS, ExAC | 18.33 |  |  |  |  | x |  |  |  |  |  |  |  |  |  |  | (Marcos, Sarfati et al. 2014)                                                                                         |
| 214C>T       | Q72* <sup>1</sup><br>(lgl)         |                     |       |  |  |  |  | x |  |  |  |  |  |  |  |  |  |  | (Quaynor, Bosley et al. 2016)                                                                                         |
| 231C>G       | N77K<br>(lgl)                      |                     | 17.15 |  |  |  |  | x |  |  |  |  |  |  |  |  |  |  | (Dode, Fouveaut et al. 2007)                                                                                          |
| 232C>G       | R78C<br>(lgl)                      |                     | 32    |  |  |  |  | x |  |  |  |  |  |  |  |  |  |  | (Pitteloud, Meysing et al. 2006)<br><br>(Sykiotis, Plummer et al. 2010)<br><br>(Costa-Barbosa, Balasubramanian et al. |

|              |                        |  |      |  |  |  |  |   |   |  |  |  |   |  |  |  |  |  |  |                                                                                                                                                          |
|--------------|------------------------|--|------|--|--|--|--|---|---|--|--|--|---|--|--|--|--|--|--|----------------------------------------------------------------------------------------------------------------------------------------------------------|
|              |                        |  |      |  |  |  |  |   |   |  |  |  |   |  |  |  |  |  |  | 2013)                                                                                                                                                    |
| 246_247delAG | Frameshift<br>(lgl)    |  |      |  |  |  |  | x | x |  |  |  |   |  |  |  |  |  |  | (Laitinen, Vaaralahti et al. 2011, Hero, Laitinen et al. 2015)<br><br>(Entrala-Bernal, Montes-Castillo et al. 2014)<br><br>(Marcos, Sarfati et al. 2014) |
| 286T>C       | S96P<br>(lgl)          |  | 22.8 |  |  |  |  | x |   |  |  |  |   |  |  |  |  |  |  | (Vizeneuve, Hilfiger et al. 2013)                                                                                                                        |
| 287C>G       | S96C<br>(lgl)          |  | 22.4 |  |  |  |  | x |   |  |  |  |   |  |  |  |  |  |  | (Goncalves, Bastos et al. 2015)                                                                                                                          |
| 289G>A       | G97S<br>(lgl)<br><br>1 |  | 35   |  |  |  |  | x | x |  |  |  | x |  |  |  |  |  |  | (Jarzabek, Wolczynski et al. 2012)<br><br>(Tommiska, Kansakoski et al. 2014)<br><br>(Ohtaka, Fujisawa et al. 2017)                                       |
| 290G>A       | G97D<br>(lgl)          |  | 32   |  |  |  |  | x |   |  |  |  |   |  |  |  |  |  |  | (Dode, Levilliers et al. 2003)                                                                                                                           |
| 296A>G       | Y99C<br>(lgl)          |  | 22.1 |  |  |  |  | x |   |  |  |  |   |  |  |  |  |  |  | (Dode, Levilliers et al. 2003)<br><br>(Raivio, Sidis et al. 2009, Raivio, Avbelj et al. 2012)                                                            |

|              |                     |                             |      |  |  |  |  |   |  |  |  |  |  |  |  |  |  |                                                         |
|--------------|---------------------|-----------------------------|------|--|--|--|--|---|--|--|--|--|--|--|--|--|--|---------------------------------------------------------|
|              |                     |                             |      |  |  |  |  | x |  |  |  |  |  |  |  |  |  | (Sykiotis, Plummer et al. 2010)                         |
|              |                     |                             |      |  |  |  |  | x |  |  |  |  |  |  |  |  |  | (Costa-Barbosa, Balasubramanian et al. 2013)            |
|              |                     |                             |      |  |  |  |  | x |  |  |  |  |  |  |  |  |  | (Zhu, Choa et al. 2015)                                 |
| 301T>G       | C101G<br>(lgl)      |                             | 21.2 |  |  |  |  | x |  |  |  |  |  |  |  |  |  | (Quaynor, Kim et al. 2011, Quaynor, Bosley et al. 2016) |
| 302G>T       | C101F<br>(lgl)      |                             | 21.2 |  |  |  |  | x |  |  |  |  |  |  |  |  |  | (Dode, Fouveaut et al. 2007)                            |
| 303C>A       | C101*<br>(lgl)      |                             | 19.2 |  |  |  |  | x |  |  |  |  |  |  |  |  |  | C. Dodé, unpublished                                    |
| 303-304insCC | Frameshift<br>(lgl) |                             |      |  |  |  |  | x |  |  |  |  |  |  |  |  |  | (Dode, Levilliers et al. 2003)                          |
| 304G>A       | V102I<br>(lgl)      | dbSNP,<br>EVS, 1KG,<br>ExAC |      |  |  |  |  | x |  |  |  |  |  |  |  |  |  | (Albuisson, Pecheux et al. 2005)                        |
|              |                     | dbSNP,<br>EVS, 1KG,<br>ExAC |      |  |  |  |  | x |  |  |  |  |  |  |  |  |  | (Pitteloud, Meysing et al. 2006)                        |
|              |                     | dbSNP,<br>EVS, 1KG,<br>ExAC |      |  |  |  |  | x |  |  |  |  |  |  |  |  |  | (Sykiotis, Plummer et al. 2010)                         |
|              |                     | dbSNP,<br>EVS, 1KG,<br>ExAC |      |  |  |  |  | x |  |  |  |  |  |  |  |  |  | (Fukami, Iso et al. 2013)                               |





|         |                        | ExAC                        |       |  |  |  |   |   |   |   |  |  |  |  |  |  |  |  |   | 2013)                                                            |
|---------|------------------------|-----------------------------|-------|--|--|--|---|---|---|---|--|--|--|--|--|--|--|--|---|------------------------------------------------------------------|
| 326dupG | Frameshift<br>(lgl)    |                             |       |  |  |  |   | x |   |   |  |  |  |  |  |  |  |  |   | C. Dodé, unpublished                                             |
| 327del  | Frameshift<br>(lgl)    |                             |       |  |  |  |   | x |   |   |  |  |  |  |  |  |  |  |   | C. Dodé, unpublished                                             |
| 336C>T  | Splice site<br>(AB)    | dbSNP,<br>EVS, 1KG,<br>ExAC |       |  |  |  | x |   |   |   |  |  |  |  |  |  |  |  | x | (Raivio, Falardeau et al. 2007)                                  |
| 346G>A  | V116I<br>(AB)          |                             | 13.92 |  |  |  |   | x |   |   |  |  |  |  |  |  |  |  |   | (Marcos, Sarfati et al. 2014)                                    |
| 347T>G  | V116G<br>(AB)          |                             | 22.1  |  |  |  |   | x |   |   |  |  |  |  |  |  |  |  |   | C. Dodé, unpublished                                             |
| 350A>G  | N117S<br>(AB)<br><br>1 |                             | 13.32 |  |  |  |   | x |   |   |  |  |  |  |  |  |  |  |   | (Raivio, Avbelj et al. 2012)<br><br>(Shaw, Seminara et al. 2011) |
| 358C>T  | R120C<br>(AB)          |                             | 32    |  |  |  |   | x | x | x |  |  |  |  |  |  |  |  |   | (Xu, Niu et al. 2015)                                            |
| 386A>C  | D129A<br>(AB)          |                             | 29.8  |  |  |  |   | x |   |   |  |  |  |  |  |  |  |  |   | (Albuisson, Pecheux et al. 2005)                                 |
| 407C>A  | S136*<br>(AB)          |                             | 42    |  |  |  |   | x |   |   |  |  |  |  |  |  |  |  |   | C. Dodé, unpublished                                             |

|            |                            |  |       |   |  |  |  |   |   |   |   |             |  |   |   |   |  |   |                                                             |
|------------|----------------------------|--|-------|---|--|--|--|---|---|---|---|-------------|--|---|---|---|--|---|-------------------------------------------------------------|
| 412G>T     | E138*<br>(AB)              |  | 42    |   |  |  |  | x |   |   |   |             |  |   |   |   |  |   | C. Dodé, unpublished                                        |
| 416A>G     | K139R<br>(AB)              |  | 15.03 |   |  |  |  | x |   |   |   |             |  |   |   |   |  |   | C. Dodé, unpublished                                        |
| 418G>T     | E140*<br>(AB)              |  | 42    |   |  |  |  | x |   |   |   |             |  |   |   |   |  |   | C. Dodé, unpublished                                        |
| 422C>G     | T141R<br>(AB)              |  | 14.69 |   |  |  |  | x |   |   |   |             |  |   |   |   |  |   | (Costa-Barbosa, Balasubramanian et al. 2013)                |
| 424_427del | Frameshift<br>(AB)         |  |       |   |  |  |  | x |   |   |   |             |  |   |   |   |  |   | (Sarfati, Fouveaut et al. 2013)<br><br>C. Dodé, unpublished |
| 443G>A     | R148H<br>(AB)              |  | 22.4  |   |  |  |  | x |   |   |   |             |  |   |   |   |  |   | (Nair, Jadhav et al. 2016)                                  |
| 454G>A     | A152T <sup>1</sup><br>(AB) |  |       |   |  |  |  |   | x | x |   |             |  |   |   |   |  | x | (Hong, Hu et al. 2016)                                      |
| 482T>C     | M161T<br>(IgII)            |  | 17.05 |   |  |  |  | x |   |   |   |             |  |   |   |   |  |   | (Jarzabek, Wolczynski et al. 2012)                          |
| 494T>C     | L165S<br>(IgII)            |  | 24    | x |  |  |  |   |   | x |   | EC<br>(H/F) |  | x | x | x |  |   | (Simonis, Migeotte et al. 2013)                             |
| 499G>T     | A167S**                    |  | 27.6  |   |  |  |  | x |   | x | x | S           |  |   | x |   |  |   | (Dode, Levilliers et al. 2003)                              |

|        |                   |  |       |   |  |  |  |   |   |   |   |   |                |  |   |   |   |  |  |                                                                     |
|--------|-------------------|--|-------|---|--|--|--|---|---|---|---|---|----------------|--|---|---|---|--|--|---------------------------------------------------------------------|
|        | (IgII)            |  |       |   |  |  |  | x |   |   |   |   |                |  |   |   |   |  |  | (Thurman, Kathir et al. 2012)<br>(Jarzabek, Wolczynski et al. 2012) |
| 506C>T | P169L**<br>(IgII) |  | 29.2  |   |  |  |  | x |   |   |   |   |                |  |   |   |   |  |  | (Costa-Barbosa, Balasubramanian et al. 2013)                        |
| 521T>C | V174A<br>(IgII)   |  | 25.1  |   |  |  |  | x |   |   |   |   |                |  |   |   |   |  |  | (Marcos, Sarfati et al. 2014)                                       |
| 535G>C | C178S<br>(IgII)   |  | 33    |   |  |  |  | x | x | x | x | x |                |  |   |   |   |  |  | (Zenaty, Bretones et al. 2006)                                      |
| 565C>T | R189C<br>(IgII)   |  | 22.6  |   |  |  |  | x |   |   |   |   |                |  |   |   |   |  |  | C. Dodé, unpublished                                                |
| 570G>A | W190*<br>(IgII)   |  | 42    |   |  |  |  | x |   |   |   |   |                |  |   |   |   |  |  | (Costa-Barbosa, Balasubramanian et al. 2013)                        |
| 572T>C | L191S<br>(IgII)   |  | 21.2  | x |  |  |  |   |   |   |   |   | S; EC<br>(H/F) |  | x | x | x |  |  | (Simonis, Migeotte et al. 2013)                                     |
| 591C>A | F197L<br>(IgII)   |  | 17.02 |   |  |  |  | x |   |   |   |   |                |  |   |   |   |  |  | (Sykiotis, Plummer et al. 2010)                                     |
| 625C>T | R209C<br>(IgII)   |  | 32    |   |  |  |  | x |   |   |   |   |                |  |   |   |   |  |  | (Tommiska, Kansakoski et al. 2014)                                  |

|        |                 |                |       |  |  |  |  |   |  |  |  |  |  |  |  |  |  |  |  |                                              |
|--------|-----------------|----------------|-------|--|--|--|--|---|--|--|--|--|--|--|--|--|--|--|--|----------------------------------------------|
|        |                 |                |       |  |  |  |  | x |  |  |  |  |  |  |  |  |  |  |  | (Xu, Niu et al. 2015)                        |
|        |                 |                |       |  |  |  |  | x |  |  |  |  |  |  |  |  |  |  |  | (Akkus, Kotan et al. 2017)                   |
|        |                 |                |       |  |  |  |  | x |  |  |  |  |  |  |  |  |  |  |  | C. Dodé, unpublished                         |
| 626G>A | R209H<br>(IgII) |                | 34    |  |  |  |  | x |  |  |  |  |  |  |  |  |  |  |  | (Laitinen, Tommiska et al. 2010)             |
| 646A>G | I216V<br>(IgII) | dbSNP,<br>ExAC | 13.43 |  |  |  |  | x |  |  |  |  |  |  |  |  |  |  |  | (Nair, Jadhav et al. 2016)                   |
| 650T>C | M217T<br>(IgII) |                | 22.3  |  |  |  |  | x |  |  |  |  |  |  |  |  |  |  |  | C. Dodé, unpublished                         |
| 670G>C | D224H<br>(IgII) |                | 34    |  |  |  |  | x |  |  |  |  |  |  |  |  |  |  |  | (Pitteloud, Meysing et al. 2006)             |
|        |                 |                |       |  |  |  |  | x |  |  |  |  |  |  |  |  |  |  |  | (Costa-Barbosa, Balasubramanian et al. 2013) |
| 672C>G | D224E<br>(IgII) |                | 34    |  |  |  |  | x |  |  |  |  |  |  |  |  |  |  |  | C. Dodé, unpublished                         |
| 682T>G | Y228D<br>(IgII) |                | 31    |  |  |  |  | x |  |  |  |  |  |  |  |  |  |  |  | (Raivio, Sidis et al. 2009)                  |
|        |                 |                |       |  |  |  |  | x |  |  |  |  |  |  |  |  |  |  |  | (Shaw, Seminara et al. 2011)                 |
| 709G>A | G237S<br>(IgII) |                | 32    |  |  |  |  | x |  |  |  |  |  |  |  |  |  |  |  | (Pitteloud, Acierno et al. 2006)             |

|             |                              |  |       |  |  |  |  |   |   |  |  |  |   |   |  |  |  |                                              |
|-------------|------------------------------|--|-------|--|--|--|--|---|---|--|--|--|---|---|--|--|--|----------------------------------------------|
|             |                              |  |       |  |  |  |  | x |   |  |  |  |   |   |  |  |  | (Costa-Barbosa, Balasubramanian et al. 2013) |
|             |                              |  |       |  |  |  |  | x |   |  |  |  |   |   |  |  |  | (Zhu, Choa et al. 2015)                      |
| 710G>A      | G237D<br>(IgII)              |  | 33    |  |  |  |  | x |   |  |  |  |   |   |  |  |  | (Pitteloud, Meysing et al. 2006)             |
| 716T>C      | I239T <sup>1</sup><br>(IgII) |  |       |  |  |  |  | x |   |  |  |  |   |   |  |  |  | (Raivio, Sidis et al. 2009)                  |
|             | 1                            |  |       |  |  |  |  | x |   |  |  |  |   |   |  |  |  | (Sykiotis, Plummer et al. 2010)              |
|             |                              |  |       |  |  |  |  | x |   |  |  |  |   |   |  |  |  | (Shaw, Seminara et al. 2011)                 |
| 730_732insG | Frameshift<br>(IgII)         |  |       |  |  |  |  |   |   |  |  |  | x |   |  |  |  | (Ye, Guilmatre et al. 2016)                  |
| 734T>C      | L245P<br>(IgII)              |  | 19.37 |  |  |  |  | x | x |  |  |  |   |   |  |  |  | (Trarbach, Costa et al. 2006)                |
| 748C>T      | R250W<br>(IgII-IgIII)        |  | 25.3  |  |  |  |  | x |   |  |  |  |   | x |  |  |  | (Trarbach, Costa et al. 2006)                |
|             |                              |  |       |  |  |  |  | x | x |  |  |  |   |   |  |  |  | (Dode, Fouveau et al. 2007)                  |
|             |                              |  |       |  |  |  |  | x |   |  |  |  |   |   |  |  |  | (Gu, Li et al. 2016)                         |
| 749G>A      | R250Q<br>(IgII-IgIII)        |  | 37    |  |  |  |  | x |   |  |  |  |   |   |  |  |  | (Falardeau, Chung et al. 2008)               |

|        |                       |  |    |  |   |  |   |  |  |   |  |  |  |   |   |   |  |  |                                                                                                                                                                                                                                                                                     |
|--------|-----------------------|--|----|--|---|--|---|--|--|---|--|--|--|---|---|---|--|--|-------------------------------------------------------------------------------------------------------------------------------------------------------------------------------------------------------------------------------------------------------------------------------------|
|        | 1                     |  |    |  |   |  | x |  |  |   |  |  |  |   |   |   |  |  | (Raivio, Sidis et al. 2009)<br>(Sykiotis, Plummer et al. 2010)<br>(Marcos, Sarfati et al. 2014)<br>(Choi, Balasubramanian et al. 2015)<br><br>(Costa-Barbosa, Balasubramanian et al. 2013)                                                                                          |
| 749G>C | R250P<br>(IgII-IgIII) |  | 34 |  |   |  | x |  |  | x |  |  |  |   | x | x |  |  | (Dubourg, Carre et al. 2016)                                                                                                                                                                                                                                                        |
| 755C>G | P252R<br>(IgII-IgIII) |  | 32 |  | x |  |   |  |  |   |  |  |  | x |   |   |  |  | (Chokdeemboon, Mahatumarat et al. 2013)<br><br>Ma et al., 1998<br>(Roscioli, Flanagan et al. 2000)<br><br>(Bessenyei, Tihanyi et al. 2014, Bessenyei, Nagy et al. 2015)<br><br>(Lajeunie, Heuertz et al. 2006)<br>(Muenke, Schell et al. 1994)<br><br>(Bellus, Gaudenz et al. 1996) |





|        |                  |  |    |  |  |  |  |   |   |  |  |  |   |  |  |  |  |  |                                              |
|--------|------------------|--|----|--|--|--|--|---|---|--|--|--|---|--|--|--|--|--|----------------------------------------------|
|        |                  |  |    |  |  |  |  | x |   |  |  |  |   |  |  |  |  |  | (Sykiotis, Plummer et al. 2010)              |
|        |                  |  |    |  |  |  |  | x |   |  |  |  |   |  |  |  |  |  | (Costa-Barbosa, Balasubramanian et al. 2013) |
| 776G>A | G259E<br>(IgIII) |  | 35 |  |  |  |  | x | x |  |  |  |   |  |  |  |  |  | (Xu, Niu et al. 2015)                        |
| 779G>A | G260E<br>(IgIII) |  |    |  |  |  |  |   |   |  |  |  |   |  |  |  |  |  | (Caronia, Martin et al. 2011)                |
| 790A>C | N264H<br>(IgIII) |  | 32 |  |  |  |  | x |   |  |  |  | C |  |  |  |  |  | (Nair, Jadhav et al. 2016)                   |
| 809G>A | G270D<br>(IgIII) |  | 36 |  |  |  |  | x |   |  |  |  |   |  |  |  |  |  | (Dode, Fouveaut et al. 2007)                 |
|        |                  |  |    |  |  |  |  | x |   |  |  |  |   |  |  |  |  |  | (Jarzabek, Wolczynski et al. 2012)           |
| 817G>A | V273M<br>(IgIII) |  | 35 |  |  |  |  | x | x |  |  |  |   |  |  |  |  |  | (Albuisson, Pecheux et al. 2005)             |
|        |                  |  |    |  |  |  |  | x |   |  |  |  |   |  |  |  |  |  | (Pitteloud, Meysing et al. 2006)             |
|        |                  |  |    |  |  |  |  | x |   |  |  |  |   |  |  |  |  |  | (Sykiotis, Plummer et al. 2010)              |
|        |                  |  |    |  |  |  |  | x |   |  |  |  |   |  |  |  |  |  | (Costa-Barbosa, Balasubramanian et al. 2013) |

|            |                         |  |      |  |  |  |  |   |   |   |  |  |  |  |  |  |  |  |  |                                                                                                                                                            |
|------------|-------------------------|--|------|--|--|--|--|---|---|---|--|--|--|--|--|--|--|--|--|------------------------------------------------------------------------------------------------------------------------------------------------------------|
| 821A>G     | E274G<br>(IgIII)        |  | 28.1 |  |  |  |  | x |   | x |  |  |  |  |  |  |  |  |  | (Pitteloud, Meysing et al. 2006)<br><br>(Sykiotis, Plummer et al. 2010)<br><br>(Costa-Barbosa, Balasubramanian et al. 2013)<br><br>(Zhu, Choa et al. 2015) |
| 830G>A     | C277Y<br>(IgIII)        |  | 34   |  |  |  |  | x |   |   |  |  |  |  |  |  |  |  |  | (Dode, Levilliers et al. 2003, Dode, Fouveaut et al. 2007)                                                                                                 |
| 837_838del | Frameshift<br>(IgIII)   |  |      |  |  |  |  | x |   |   |  |  |  |  |  |  |  |  |  | (Marcos, Sarfati et al. 2014)                                                                                                                              |
| 841A>G     | S281G<br>(IgIII)        |  | 32   |  |  |  |  | x |   |   |  |  |  |  |  |  |  |  |  | (Costa-Barbosa, Balasubramanian et al. 2013)                                                                                                               |
| 841_846del | S281-D282del<br>(IgIII) |  |      |  |  |  |  | x | x |   |  |  |  |  |  |  |  |  |  | (Bailleul-Forestier, Gros et al. 2010)                                                                                                                     |
| 848C>G     | P283R<br>(IgIII)        |  | 22.1 |  |  |  |  | x | x |   |  |  |  |  |  |  |  |  |  | (Dode, Fouveaut et al. 2007)<br><br>(Costa-Barbosa, Balasubramanian et al. 2013)                                                                           |
| 854C>G     | P285R                   |  | 20.3 |  |  |  |  | x |   |   |  |  |  |  |  |  |  |  |  | (Sykiotis, Plummer et al.                                                                                                                                  |

|            |                               |                     |       |  |  |  |  |   |   |  |  |  |  |   |  |   |  |  |                                                                                           |
|------------|-------------------------------|---------------------|-------|--|--|--|--|---|---|--|--|--|--|---|--|---|--|--|-------------------------------------------------------------------------------------------|
|            | (IgIII)<br>1                  |                     |       |  |  |  |  | x |   |  |  |  |  |   |  |   |  |  | 2010)<br>(Shaw, Seminara et al. 2011)<br><br>(Costa-Barbosa, Balasubramanian et al. 2013) |
| 858_866del | Frameshift<br>(IgIII)         |                     |       |  |  |  |  | x |   |  |  |  |  |   |  |   |  |  | C. Dodé, unpublished                                                                      |
| 867G>A     | W289*<br>(IgIII)              |                     | 44    |  |  |  |  | x |   |  |  |  |  |   |  |   |  |  | (Luo, Zheng et al. 2017)                                                                  |
| 880G>A     | E294K <sup>1</sup><br>(IgIII) | dbSNP,<br>1KG, ExAC |       |  |  |  |  |   |   |  |  |  |  | x |  | x |  |  | (Hong, Hu et al. 2016)                                                                    |
| 887A>T     | N296I<br>(IgIII)              |                     | 32    |  |  |  |  | x |   |  |  |  |  |   |  |   |  |  | (Costa-Barbosa, Balasubramanian et al. 2013)                                              |
| 891del     | Frameshift<br>(IgIII)         |                     |       |  |  |  |  | x |   |  |  |  |  |   |  |   |  |  | C. Dodé, unpublished                                                                      |
| 899T>C     | I300T<br>(IgIII)              |                     | 15.48 |  |  |  |  |   |   |  |  |  |  |   |  |   |  |  | (Roscioli, Elakis et al. 2013)                                                            |
| 925C>T     | Q309*<br>(IgIII)              |                     | 43    |  |  |  |  | x |   |  |  |  |  |   |  |   |  |  | (Costa-Barbosa, Balasubramanian et al. 2013)                                              |
| 936G>A     | Splice site                   |                     |       |  |  |  |  | x | x |  |  |  |  |   |  |   |  |  | (Dode, Fouveaut et al. 2007)                                                              |

|              |                       |  |       |  |  |  |  |   |  |   |  |  |  |  |  |  |  |  |   |                                                                                            |
|--------------|-----------------------|--|-------|--|--|--|--|---|--|---|--|--|--|--|--|--|--|--|---|--------------------------------------------------------------------------------------------|
|              | (IgIII)               |  |       |  |  |  |  |   |  |   |  |  |  |  |  |  |  |  |   |                                                                                            |
| 937C>T       | H313Y<br>(IgIII)      |  | 19.13 |  |  |  |  | x |  |   |  |  |  |  |  |  |  |  |   | (Costa-Barbosa, Balasubramanian et al. 2013)                                               |
| 1054G>A      | A352T<br>(IgIII)      |  | 19.55 |  |  |  |  | x |  |   |  |  |  |  |  |  |  |  |   | (Goncalves, Bastos et al. 2015)                                                            |
| 1070C>T      | T357I<br>(IgIII)      |  | 33    |  |  |  |  | x |  |   |  |  |  |  |  |  |  |  |   | (Miura, Miura et al. 2010)<br><br>(Costa-Barbosa, Balasubramanian et al. 2013)             |
| 961_962delAA | Frameshift<br>(IgIII) |  |       |  |  |  |  | x |  |   |  |  |  |  |  |  |  |  |   | (Laitinen, Vaaralahti et al. 2011, Hero, Laitinen et al. 2015)<br><br>C. Dodé, unpublished |
| 961_964del   | Frameshift<br>(IgIII) |  |       |  |  |  |  | x |  |   |  |  |  |  |  |  |  |  |   | C. Dodé, unpublished                                                                       |
| 962_963delAA | Frameshift<br>(IgIII) |  |       |  |  |  |  | x |  |   |  |  |  |  |  |  |  |  |   | (Vizeneuve, Hilfiger et al. 2013)                                                          |
| 967G>T       | E324*<br>(IgIII)      |  | 34    |  |  |  |  | x |  | x |  |  |  |  |  |  |  |  |   | (Dode, Fouveaut et al. 2007)                                                               |
| 989T>A       | N330I<br>(IgIII)      |  | 28.1  |  |  |  |  |   |  |   |  |  |  |  |  |  |  |  | x | (White, Cabral et al. 2005)                                                                |

|         |                               |  |      |  |   |  |  |   |   |  |  |  |    |   |  |  |  |  |                                                                                                                             |
|---------|-------------------------------|--|------|--|---|--|--|---|---|--|--|--|----|---|--|--|--|--|-----------------------------------------------------------------------------------------------------------------------------|
|         |                               |  |      |  | x |  |  |   |   |  |  |  | EC | x |  |  |  |  | (Farrow, Davis et al. 2006)                                                                                                 |
| 995C>G  | S332C<br>(IgIII)              |  | 22.8 |  |   |  |  | x |   |  |  |  |    |   |  |  |  |  | (Dode, Fouveaut et al. 2007)                                                                                                |
| 1004A>T | D335V<br>(IgIII)              |  | 23   |  |   |  |  | x |   |  |  |  |    |   |  |  |  |  | C. Dodé, unpublished                                                                                                        |
| 1016A>G | Y339C<br>(IgIII)              |  | 24.4 |  |   |  |  | x |   |  |  |  |    |   |  |  |  |  | (Pitteloud, Meysing et al. 2006)<br><br>(Sykiotis, Plummer et al. 2010)<br><br>(Costa-Barbosa, Balasubramanian et al. 2013) |
| 1018A>G | T340A<br>(IgIII)              |  | 19.3 |  |   |  |  | x |   |  |  |  |    |   |  |  |  |  | C. Dodé, unpublished                                                                                                        |
| 1019C>T | T340M<br>(IgIII)              |  | 27.4 |  |   |  |  | x |   |  |  |  |    |   |  |  |  |  | (Sarfati, Fouveaut et al. 2013)<br><br>C. Dodé, unpublished                                                                 |
| 1023C>G | C341W<br>(IgIII)              |  | 24.2 |  |   |  |  | x | x |  |  |  |    |   |  |  |  |  | (Bailleul-Forestier, Gros et al. 2010)                                                                                      |
| 1025T>C | L342S <sup>1</sup><br>(IgIII) |  |      |  |   |  |  | x |   |  |  |  | C  |   |  |  |  |  | (Pitteloud, Quinton et al. 2007)<br><br>(Sykiotis, Plummer et al.                                                           |

|              |                       |  |       |  |  |  |  |   |  |  |  |  |  |  |  |  |  |  |  |                                                                                     |
|--------------|-----------------------|--|-------|--|--|--|--|---|--|--|--|--|--|--|--|--|--|--|--|-------------------------------------------------------------------------------------|
|              |                       |  |       |  |  |  |  |   |  |  |  |  |  |  |  |  |  |  |  | 2010)                                                                               |
| 1028C>T      | A343V<br>(IgIII)      |  | 19.55 |  |  |  |  | x |  |  |  |  |  |  |  |  |  |  |  | (Trarbach, Costa et al. 2006)                                                       |
| 1037C>G      | S346C<br>(IgIII)      |  | 32    |  |  |  |  | x |  |  |  |  |  |  |  |  |  |  |  | (Pitteloud, Meysing et al. 2006)                                                    |
| 1037_1038del | Frameshift<br>(IgIII) |  |       |  |  |  |  | x |  |  |  |  |  |  |  |  |  |  |  | (Costa-Barbosa, Balasubramanian et al. 2013)                                        |
| 1038dupT     | Frameshift<br>(IgIII) |  |       |  |  |  |  | x |  |  |  |  |  |  |  |  |  |  |  | (Sykiotis, Plummer et al. 2010)                                                     |
| 1038T[3]     | Frameshift<br>(IgIII) |  |       |  |  |  |  | x |  |  |  |  |  |  |  |  |  |  |  | C. Dodé, unpublished                                                                |
| 1037delCT    | Frameshift<br>(IgIII) |  |       |  |  |  |  | x |  |  |  |  |  |  |  |  |  |  |  | (Costa-Barbosa, Balasubramanian et al. 2013)<br><br>(Zhu, Choa et al. 2015)         |
| 1039insT     | Frameshift<br>(IgIII) |  |       |  |  |  |  | x |  |  |  |  |  |  |  |  |  |  |  | (Sykiotis, Plummer et al. 2010)<br><br>(Costa-Barbosa, Balasubramanian et al. 2013) |
| 1040dupT     | Frameshift<br>(IgIII) |  |       |  |  |  |  | x |  |  |  |  |  |  |  |  |  |  |  | (Costa-Barbosa, Balasubramanian et al. 2013)                                        |

|                |                    |  |       |  |  |  |  |   |   |   |  |  |  |  |  |  |  |  |  |                                                                                                                                                                                   |
|----------------|--------------------|--|-------|--|--|--|--|---|---|---|--|--|--|--|--|--|--|--|--|-----------------------------------------------------------------------------------------------------------------------------------------------------------------------------------|
| 1042G>A        | G348R<br>(IgIII)   |  | 32    |  |  |  |  | x | x | x |  |  |  |  |  |  |  |  |  | (Bailleul-Forestier, Gros et al. 2010)<br><br>(Costa-Barbosa, Balasubramanian et al. 2013)<br><br>(Marcos, Sarfati et al. 2014)<br><br>(Villanueva, Jacobson-Dickman et al. 2015) |
| 1043G>A        | G348E<br>(IgIII)   |  | 33    |  |  |  |  | x |   |   |  |  |  |  |  |  |  |  |  | (Xu, Niu et al. 2015)                                                                                                                                                             |
| 1057G>A        | S353T<br>(IgIII)   |  | 17.23 |  |  |  |  | x |   |   |  |  |  |  |  |  |  |  |  | (Goncalves, Bastos et al. 2015)                                                                                                                                                   |
| 1063T>C        | W355R<br>(IgIII)   |  | 25.5  |  |  |  |  | x |   |   |  |  |  |  |  |  |  |  |  | (Costa-Barbosa, Balasubramanian et al. 2013)                                                                                                                                      |
| 1081G>C        | A361P<br>(JM)      |  | 16.32 |  |  |  |  | x |   |   |  |  |  |  |  |  |  |  |  | (Dode, Fouveaut et al. 2007)                                                                                                                                                      |
| 1088_1089insAG | Frameshift<br>(JM) |  |       |  |  |  |  | x |   |   |  |  |  |  |  |  |  |  |  | C. Dodé, unpublished                                                                                                                                                              |
| 1093_1094delAG | Frameshift<br>(JM) |  |       |  |  |  |  | x | x |   |  |  |  |  |  |  |  |  |  | (Albuisson, Pecheux et al. 2005)                                                                                                                                                  |
| 1097C>T        | P366L<br>(JM)      |  | 16.29 |  |  |  |  | x |   |   |  |  |  |  |  |  |  |  |  | (Trarbach, Costa et al. 2006)                                                                                                                                                     |

|              |                     |  |       |  |   |  |  |   |   |   |  |  |   |  |  |  |  |                                              |
|--------------|---------------------|--|-------|--|---|--|--|---|---|---|--|--|---|--|--|--|--|----------------------------------------------|
|              |                     |  |       |  |   |  |  | x |   |   |  |  |   |  |  |  |  | (Costa-Barbosa, Balasubramanian et al. 2013) |
|              |                     |  |       |  |   |  |  | x |   |   |  |  |   |  |  |  |  | (Zhu, Choa et al. 2015)                      |
| 1107G>T(C,A) | M369I<br>(JM)       |  | 15.06 |  |   |  |  |   |   | x |  |  |   |  |  |  |  | (Riley, Mansilla et al. 2007)                |
| 1115G>A      | Y372C<br>(JM)       |  | 26.1  |  | x |  |  |   |   |   |  |  |   |  |  |  |  | (White, Cabral et al. 2005)                  |
| 1122C>A      | Y374*<br>(JM)       |  | 44    |  |   |  |  | x |   |   |  |  |   |  |  |  |  | C. Dodé, unpublished                         |
| 1135T>C      | C379R<br>(JM)       |  | 26.4  |  | x |  |  |   |   |   |  |  |   |  |  |  |  | (White, Cabral et al. 2005)                  |
| 1141T>C      | C381R<br>(JM)       |  | 26.4  |  | x |  |  |   | x |   |  |  |   |  |  |  |  | (Farrow, Davis et al. 2006)                  |
|              |                     |  |       |  | x |  |  |   |   |   |  |  | S |  |  |  |  | (Sow, Ramli et al. 2010)                     |
| 1151C>A      | A384D<br>(TM)       |  | 19.58 |  |   |  |  | x |   |   |  |  |   |  |  |  |  | C. Dodé, unpublished                         |
| 1279G>T      | V427L<br>(TM)       |  | 25.2  |  |   |  |  | x |   |   |  |  |   |  |  |  |  | (Sykiotis, Plummer et al. 2010)              |
| 1285-2A>G    | Splice site<br>(TM) |  |       |  |   |  |  | x |   |   |  |  |   |  |  |  |  | (Costa-Barbosa, Balasubramanian et al. 2013) |





|          |                    |  |       |  |  |  |   |  |   |  |   |  |  |  |  |  |  |  |  |                                              |
|----------|--------------------|--|-------|--|--|--|---|--|---|--|---|--|--|--|--|--|--|--|--|----------------------------------------------|
|          | (ID)               |  |       |  |  |  |   |  |   |  |   |  |  |  |  |  |  |  |  |                                              |
| 1383T[3] | Frameshift<br>(ID) |  |       |  |  |  | x |  |   |  |   |  |  |  |  |  |  |  |  | C. Dodé, unpublished                         |
| 1399G>A  | E467K<br>(ID)      |  | 16.01 |  |  |  |   |  | x |  |   |  |  |  |  |  |  |  |  | (Riley, Mansilla et al. 2007)                |
| 1409G>T  | R470L<br>(ID)      |  | 16.58 |  |  |  | x |  |   |  |   |  |  |  |  |  |  |  |  | (Pitteloud, Quinton et al. 2007)             |
|          | 1                  |  |       |  |  |  | x |  |   |  |   |  |  |  |  |  |  |  |  | (Raivio, Sidis et al. 2009)                  |
|          | 1                  |  |       |  |  |  | x |  |   |  |   |  |  |  |  |  |  |  |  | (Sykiotis, Plummer et al. 2010)              |
|          | 1                  |  |       |  |  |  | x |  |   |  |   |  |  |  |  |  |  |  |  | (Shaw, Seminara et al. 2011)                 |
|          |                    |  |       |  |  |  | x |  |   |  |   |  |  |  |  |  |  |  |  | (Abel, Shaw et al. 2013)                     |
| 1423C>T  | R475W<br>(ID)      |  | 19.96 |  |  |  | x |  |   |  |   |  |  |  |  |  |  |  |  | C. Dodé, unpublished                         |
| 1424G>A  | R475Q<br>(ID)      |  | 36    |  |  |  | x |  |   |  |   |  |  |  |  |  |  |  |  | C. Dodé, unpublished                         |
| 1428C>G  | D476E<br>(ID)      |  | 15.32 |  |  |  | x |  | x |  | x |  |  |  |  |  |  |  |  | (Wang, Wang et al. 2014)                     |
| 1447C>A  | P483T<br>(TK)      |  | 27.2  |  |  |  | x |  |   |  |   |  |  |  |  |  |  |  |  | (Costa-Barbosa, Balasubramanian et al. 2013) |

|           |               |  |       |   |  |  |   |   |   |   |   |   |             |   |   |   |  |  |  |                                                                        |
|-----------|---------------|--|-------|---|--|--|---|---|---|---|---|---|-------------|---|---|---|--|--|--|------------------------------------------------------------------------|
| 1447C>T   | P483S<br>(TK) |  | 29.8  |   |  |  | x |   |   | x |   |   |             |   |   |   |  |  |  | (Raivio, Avbelj et al. 2012)                                           |
| 1453G>A   | G485R<br>(TK) |  | 36    |   |  |  |   | x | x | x |   |   | EC<br>(F)   |   |   |   |  |  |  | (Villanueva, Jacobson-Dickman et al. 2015)                             |
| 1454G>T   | G485V<br>(TK) |  | 34    | x |  |  |   |   |   |   |   |   |             |   |   |   |  |  |  | (Dubourg, Carre et al. 2016)                                           |
| 1459G>T   | G487C<br>(TK) |  | 35    | x |  |  |   | x | x | x | x | x | EC<br>(H/F) | x | x | x |  |  |  | Lansdon et al.                                                         |
| 1460G>A   | G487D<br>(TK) |  | 36    | x |  |  |   |   |   | x |   |   | EC<br>(F)   | x | x | x |  |  |  | (Hong, Hu et al. 2016)<br><br>(Nair, Jadhav et al. 2016)               |
| 1468G>C   | G490R<br>(TK) |  | 36    | x |  |  |   |   |   | x |   |   | EC<br>(H/F) | x |   | x |  |  |  | (Simonis, Migeotte et al. 2013)<br><br>(Dubourg, Carre et al. 2016)    |
| 1474G>A   | V492M<br>(TK) |  | 18.33 |   |  |  |   | x |   |   |   |   |             |   |   |   |  |  |  | (Costa-Barbosa, Balasubramanian et al. 2013)                           |
| 1535C>T   | A512V<br>(TK) |  | 36    |   |  |  |   | x |   | x |   |   |             |   |   |   |  |  |  | (Tommiska, Kansakoski et al. 2014)<br><br>(Shaw, Seminara et al. 2011) |
| 1553-2A>G | 1             |  |       |   |  |  |   | x |   |   |   |   |             |   |   |   |  |  |  | (Sykiotis, Plummer et al.                                              |

|           |                     |                |       |  |  |  |   |   |   |   |  |  |  |  |              |  |  |  |  |                                                                                      |
|-----------|---------------------|----------------|-------|--|--|--|---|---|---|---|--|--|--|--|--------------|--|--|--|--|--------------------------------------------------------------------------------------|
|           |                     |                |       |  |  |  |   |   |   |   |  |  |  |  |              |  |  |  |  | 2010)                                                                                |
| 1561G>A   | A520T<br>(TK)       |                | 36    |  |  |  |   | x |   |   |  |  |  |  |              |  |  |  |  | (Albuisson, Pecheux et al. 2005)                                                     |
| 1604T>A   | M535K<br>(TK)       |                | 33    |  |  |  |   |   | x | x |  |  |  |  |              |  |  |  |  | (Hong, Hu et al. 2016)                                                               |
| 1609A>G   | M537V<br>(TK)       | dbSNP,<br>ExAC | 17.65 |  |  |  |   | x |   |   |  |  |  |  |              |  |  |  |  | (Sykiotis, Plummer et al. 2010)                                                      |
| 1612A>G   | I538V<br>(TK)       |                | 19.69 |  |  |  |   | x |   |   |  |  |  |  |              |  |  |  |  | (Pitteloud, Meysing et al. 2006)<br><br>(Costa-Barbosa, Balasubramanian et al. 2013) |
| 1614C>T   | Splice site<br>(TK) |                |       |  |  |  |   | x |   |   |  |  |  |  |              |  |  |  |  | (Tommiska, Kansakoski et al. 2014)                                                   |
| 1638C>A   | N546K<br>(TK)       |                | 23.4  |  |  |  | x |   |   |   |  |  |  |  |              |  |  |  |  | (Bennett, Tan et al. 2016)                                                           |
| 1663+1G>T | Splice site<br>(TK) |                |       |  |  |  |   | x |   |   |  |  |  |  | P; EC<br>(H) |  |  |  |  | (Ohtaka, Fujisawa et al. 2017)                                                       |
| 1664-2A>G | Splice site<br>(TK) |                |       |  |  |  |   | x |   |   |  |  |  |  |              |  |  |  |  | (Sarfati, Fouveaut et al. 2013)<br><br>(Marcos, Sarfati et al. 2014)                 |

|               |               |  |      |  |  |  |  |   |  |  |  |  |             |  |  |  |  |  |                                                                                                                                          |
|---------------|---------------|--|------|--|--|--|--|---|--|--|--|--|-------------|--|--|--|--|--|------------------------------------------------------------------------------------------------------------------------------------------|
| 1708C>T       | R570W<br>(TK) |  | 24.6 |  |  |  |  | x |  |  |  |  |             |  |  |  |  |  | (Izumi, Suzuki et al. 2014)                                                                                                              |
| 1755T>A       | Y585*<br>(TK) |  | 44   |  |  |  |  | x |  |  |  |  |             |  |  |  |  |  | (Pitteloud, Acierno et al. 2006)<br><br>(Sykiotis, Plummer et al. 2010)                                                                  |
| 1780C>T       | Q594*<br>(TK) |  | 45   |  |  |  |  | x |  |  |  |  | EC<br>(H/F) |  |  |  |  |  | (Villanueva, Jacobson-Dickman et al. 2015)                                                                                               |
| 1810G>A       | A604T<br>(TK) |  | 26.6 |  |  |  |  | x |  |  |  |  |             |  |  |  |  |  | (Sarfati, Fouveaut et al. 2013, Sarfati, Bouvattier et al. 2015)                                                                         |
| 1819G>A       | V607M<br>(TK) |  | 34   |  |  |  |  | x |  |  |  |  |             |  |  |  |  |  | (Dode, Fouveaut et al. 2007)<br>(Dode, Levilliers et al. 2003)                                                                           |
| 1825C>T       | R609*<br>(TK) |  | 45   |  |  |  |  |   |  |  |  |  |             |  |  |  |  |  | (Riley, Mansilla et al. 2007)<br><br>(Laitinen, Vaaralahti et al. 2011, Hero, Laitinen et al. 2015)<br><br>(Marcos, Sarfati et al. 2014) |
| 1835A>G       | E612G<br>(TK) |  | 27.2 |  |  |  |  | x |  |  |  |  |             |  |  |  |  |  | (Costa-Barbosa, Balasubramanian et al. 2013)                                                                                             |
| 1836_1837insT | Frameshift    |  |      |  |  |  |  | x |  |  |  |  |             |  |  |  |  |  | (Albuisson, Pecheux et al. 2005)                                                                                                         |

|                |                        |      |  |  |  |  |  |   |   |   |   |  |   |  |  |  |  |   |  |                                                                                                                                                                                                                                                                                                  |
|----------------|------------------------|------|--|--|--|--|--|---|---|---|---|--|---|--|--|--|--|---|--|--------------------------------------------------------------------------------------------------------------------------------------------------------------------------------------------------------------------------------------------------------------------------------------------------|
|                | (TK)                   |      |  |  |  |  |  |   |   |   |   |  |   |  |  |  |  |   |  |                                                                                                                                                                                                                                                                                                  |
| 1852_1853delAA | Frameshift<br>(TK)     |      |  |  |  |  |  | x |   |   |   |  |   |  |  |  |  |   |  | (Trarbach, Costa et al. 2006)                                                                                                                                                                                                                                                                    |
| 1854G>T        | K618N<br>(TK)<br><br>1 | 33   |  |  |  |  |  | x |   |   |   |  |   |  |  |  |  |   |  | (Raivio, Sidis et al. 2009)<br><br>(Sykiotis, Plummer et al. 2010)                                                                                                                                                                                                                               |
| 1862A>G        | H621R<br>(TK)          | 30   |  |  |  |  |  | x |   | x |   |  | P |  |  |  |  | x |  | (Dode, Fouveaut et al. 2007)                                                                                                                                                                                                                                                                     |
| 1864C>T        | R622*<br>(TK)<br><br>1 | 44   |  |  |  |  |  | x |   | x |   |  |   |  |  |  |  |   |  | (Dode, Levilliers et al. 2003,<br>Dode, Fouveaut et al. 2007)<br><br>(Pitteloud, Acierno et al. 2005)<br>(Pitteloud, Meysing et al. 2006)<br><br>(Sykiotis, Plummer et al. 2010)<br><br>(Xu, Niu et al. 2015)<br><br>(Costa-Barbosa, Balasubramanian et al. 2013)<br><br>(Zhu, Choa et al. 2015) |
| 1864C>G        | R622G<br>(TK)          | 21.1 |  |  |  |  |  | x | x |   | x |  | S |  |  |  |  |   |  | (Zenaty, Bretones et al. 2006)                                                                                                                                                                                                                                                                   |



|                |                         |  |      |   |  |   |  |   |   |   |   |                 |  |   |  |   |  |                                                       |
|----------------|-------------------------|--|------|---|--|---|--|---|---|---|---|-----------------|--|---|--|---|--|-------------------------------------------------------|
|                |                         |  |      |   |  |   |  | x |   |   |   |                 |  |   |  |   |  | (Costa-Barbosa, Balasubramanian et al. 2013)          |
|                |                         |  |      |   |  |   |  | x |   |   |   |                 |  |   |  |   |  | (Xu, Niu et al. 2015)                                 |
| 1907_1908del   | Frameshift (TK)         |  |      |   |  |   |  | x |   |   |   |                 |  |   |  |   |  | Sarfati et al., 2013<br>(Marcos, Sarfati et al. 2014) |
| 1916T>C        | I639T (TK)              |  | 28.6 |   |  |   |  | x |   |   |   |                 |  |   |  |   |  | (Zhu, Choa et al. 2015)                               |
| 1921G>A        | D641N (TK)              |  | 36   | x |  |   |  |   |   | x | x | S (H);<br>O (F) |  | x |  | x |  | (Hong, Hu et al. 2016)                                |
| 1928G>A        | G643D (TK)              |  | 35   |   |  |   |  |   | x |   |   |                 |  | x |  | x |  | (Dubourg, Carre et al. 2016)                          |
| 1936C>T        | R646W (TK)              |  | 22   |   |  |   |  | x | x | x |   |                 |  |   |  |   |  | (Tommiska, Kansakoski et al. 2014)                    |
| 1961dupA       | Y654* (TK)              |  | 43   |   |  |   |  | x |   |   |   |                 |  |   |  |   |  | (Goncalves, Bastos et al. 2015)                       |
| 1966A>G        | K656E <sup>2</sup> (TK) |  | 27.3 |   |  | x |  |   |   |   |   |                 |  |   |  |   |  | (Bennett, Tan et al. 2016)                            |
| 1970_1971delCA | Frameshift (TK)         |  |      |   |  |   |  | x |   |   |   |                 |  |   |  |   |  | (Dode, Fouveaut et al. 2007)                          |



|           |                              |  |      |  |  |  |  |   |  |   |  |  |  |  |  |  |  |  |                                                                                                                                     |
|-----------|------------------------------|--|------|--|--|--|--|---|--|---|--|--|--|--|--|--|--|--|-------------------------------------------------------------------------------------------------------------------------------------|
| 1977+1G>A | Splice site<br>(TK)<br><br>1 |  |      |  |  |  |  | x |  |   |  |  |  |  |  |  |  |  | (Sarfati, Fouveaut et al. 2013)<br><br>(Dallago, Abech et al. 2008)<br>(Dode, Fouveaut et al. 2007)<br>(Dubourg, Carre et al. 2016) |
| 1981C>T   | R661*<br>(TK)                |  | 44   |  |  |  |  | x |  |   |  |  |  |  |  |  |  |  | (Dode, Fouveaut et al. 2007)                                                                                                        |
| 1987C>T   | P663S<br>(TK)                |  | 34   |  |  |  |  | x |  |   |  |  |  |  |  |  |  |  | C. Dodé, unpublished                                                                                                                |
| 1996T>A   | W666R<br>(TK)                |  | 27.5 |  |  |  |  | x |  |   |  |  |  |  |  |  |  |  | (Dode, Levilliers et al. 2003,<br>Dode, Fouveaut et al. 2007)                                                                       |
| 2008G>A   | E670K<br>(TK)                |  | 36   |  |  |  |  | x |  |   |  |  |  |  |  |  |  |  | (Costa-Barbosa,<br>Balasubramanian et al. 2013)                                                                                     |
| 2009A>C   | E670A<br>(TK)                |  | 32   |  |  |  |  | x |  | x |  |  |  |  |  |  |  |  | (Laitinen, Vaaralahti et al. 2011)<br><br>(Villanueva, Jacobson-Dickman et al. 2015)                                                |
| 2011G>C   | A671P<br>(TK)                |  | 36   |  |  |  |  | x |  |   |  |  |  |  |  |  |  |  | (Raivio, Sidis et al. 2009)<br><br>(Sykiotis, Plummer et al. 2010)                                                                  |



|         |               |  |      |  |  |  |  |   |   |   |  |  |  |  |  |  |  |   |                                                                                                                                                                                                                       |
|---------|---------------|--|------|--|--|--|--|---|---|---|--|--|--|--|--|--|--|---|-----------------------------------------------------------------------------------------------------------------------------------------------------------------------------------------------------------------------|
|         |               |  |      |  |  |  |  | x |   |   |  |  |  |  |  |  |  |   | (Quaynor, Kim et al. 2011)<br>(Quaynor, Bosley et al. 2016)<br><br>C. Dodé, unpublished<br><br>(Zhu, Choa et al. 2015)<br><br>(Choi, Balasubramanian et al. 2015)<br><br>(Costa-Barbosa, Balasubramanian et al. 2013) |
| 2062G>T | V688L<br>(TK) |  | 24.3 |  |  |  |  | x |   | x |  |  |  |  |  |  |  |   | EC<br>(F)<br><br>(Villanueva, Jacobson-Dickman et al. 2015)                                                                                                                                                           |
| 2069T>G | L690P<br>(TK) |  | 23.1 |  |  |  |  | x | x |   |  |  |  |  |  |  |  |   | (Bailleul-Forestier, Gros et al. 2010)                                                                                                                                                                                |
| 2074G>A | E692K<br>(TK) |  | 35   |  |  |  |  |   |   | x |  |  |  |  |  |  |  | x | (Dubourg, Carre et al. 2016)<br><br>C. Dodé, unpublished                                                                                                                                                              |
| 2075A>G | E692G<br>(TK) |  | 27.2 |  |  |  |  | x |   |   |  |  |  |  |  |  |  |   | (Costa-Barbosa, Balasubramanian et al. 2013)                                                                                                                                                                          |
| 2077A>T | I693F<br>(TK) |  | 28   |  |  |  |  | x |   |   |  |  |  |  |  |  |  |   | (Dode, Fouveaut et al. 2007)                                                                                                                                                                                          |
| 2084C>T | T695I         |  | 28   |  |  |  |  | x | x |   |  |  |  |  |  |  |  |   | (Nair, Jadhav et al. 2016)                                                                                                                                                                                            |

|         |               |  |       |  |  |  |  |   |  |  |  |  |           |  |  |  |  |  |                                                                                                                             |
|---------|---------------|--|-------|--|--|--|--|---|--|--|--|--|-----------|--|--|--|--|--|-----------------------------------------------------------------------------------------------------------------------------|
|         | (TK)          |  |       |  |  |  |  |   |  |  |  |  |           |  |  |  |  |  |                                                                                                                             |
| 2099C>T | P700L<br>(TK) |  | 26    |  |  |  |  | x |  |  |  |  |           |  |  |  |  |  | (Sykiotis, Plummer et al. 2010)                                                                                             |
| 2107G>C | G703R<br>(TK) |  | 23.7  |  |  |  |  | x |  |  |  |  |           |  |  |  |  |  | (Pitteloud, Meysing et al. 2006)<br><br>(Sykiotis, Plummer et al. 2010)<br><br>(Costa-Barbosa, Balasubramanian et al. 2013) |
| 2107G>A | G703S<br>(TK) |  | 17.39 |  |  |  |  | x |  |  |  |  |           |  |  |  |  |  | (Pitteloud, Meysing et al. 2006)                                                                                            |
| 2135T>C | L712P<br>(TK) |  |       |  |  |  |  | x |  |  |  |  | EC<br>(F) |  |  |  |  |  | (Villanueva, Jacobson-Dickman et al. 2015)                                                                                  |
| 2146G>T | G716C<br>(TK) |  | 27.1  |  |  |  |  | x |  |  |  |  |           |  |  |  |  |  | (Costa-Barbosa, Balasubramanian et al. 2013)                                                                                |
| 2152C>T | R718C<br>(TK) |  | 21    |  |  |  |  | x |  |  |  |  |           |  |  |  |  |  | (Costa-Barbosa, Balasubramanian et al. 2013)                                                                                |
| 2155A>G | M719V<br>(TK) |  | 21.6  |  |  |  |  | x |  |  |  |  |           |  |  |  |  |  | (Goncalves, Bastos et al. 2015)                                                                                             |
| 2156T>G | M719R         |  | 21.6  |  |  |  |  | x |  |  |  |  |           |  |  |  |  |  | (Dode, Levilliers et al. 2003, Dode, Fouveaut et al. 2007)                                                                  |

|                       |                                 |  |      |   |  |  |  |   |   |   |  |  |             |  |   |   |   |  |  |  |                                                                                                                                 |
|-----------------------|---------------------------------|--|------|---|--|--|--|---|---|---|--|--|-------------|--|---|---|---|--|--|--|---------------------------------------------------------------------------------------------------------------------------------|
|                       | (TK)                            |  |      |   |  |  |  |   |   |   |  |  |             |  |   |   |   |  |  |  |                                                                                                                                 |
| 2164C>T               | P722S<br>(TK)<br><br>1<br><br>1 |  | 29.1 |   |  |  |  | x |   | x |  |  |             |  |   |   |   |  |  |  | (Trarbach, Costa et al. 2006)<br><br>(Dode, Levilliers et al. 2003)<br><br>(Hong, Hu et al. 2016)<br><br>(Hong, Hu et al. 2016) |
| [2165C>A;<br>2172C>G] | [P722H;<br>N724K]<br>(TK)       |  |      |   |  |  |  | x | x |   |  |  |             |  |   |   |   |  |  |  | (Pitteloud, Acierno et al. 2006)                                                                                                |
| 2174G>A               | C725Y<br>(TK)                   |  | 23.9 | x |  |  |  |   |   |   |  |  | EC<br>(H/F) |  | x | x | x |  |  |  | (Simonis, Migeotte et al. 2013)                                                                                                 |
| 2180+3insT            | (TK)                            |  |      |   |  |  |  | x |   |   |  |  |             |  |   |   |   |  |  |  | (Quaynor, Bosley et al. 2016)                                                                                                   |
| 2188-5C>A             | Splice site<br>(TK)             |  |      |   |  |  |  | x |   |   |  |  |             |  |   |   |   |  |  |  | (Sykiotis, Plummer et al. 2010)                                                                                                 |
| 2190C>G               | Y730*<br>(TK)                   |  | 45   |   |  |  |  | x |   |   |  |  |             |  |   |   |   |  |  |  | (Albuisson, Pecheux et al. 2005)                                                                                                |
| 2203del               | Frameshift<br>(TK)              |  |      |   |  |  |  | x |   |   |  |  |             |  |   |   |   |  |  |  | C. Dodé, unpublished                                                                                                            |
| 2209T>C               | W737R<br>(TK)                   |  | 22.1 |   |  |  |  | x |   |   |  |  |             |  |   |   |   |  |  |  | (Costa-Barbosa, Balasubramanian et al. 2013)                                                                                    |

|           |                                 |  |       |  |  |  |  |   |  |  |  |  |  |  |  |  |  |  |  |                         |                                                                                                                                                      |
|-----------|---------------------------------|--|-------|--|--|--|--|---|--|--|--|--|--|--|--|--|--|--|--|-------------------------|------------------------------------------------------------------------------------------------------------------------------------------------------|
|           |                                 |  |       |  |  |  |  | x |  |  |  |  |  |  |  |  |  |  |  | (Zhu, Choa et al. 2015) |                                                                                                                                                      |
| 2231G>C   | R744T<br>(TK)                   |  | 23.6  |  |  |  |  | x |  |  |  |  |  |  |  |  |  |  |  | EC<br>(H/F)             | (Ohtaka, Fujisawa et al. 2017)                                                                                                                       |
| 2233C>T   | P745S<br>(TK)<br><br>1          |  | 25.5  |  |  |  |  | x |  |  |  |  |  |  |  |  |  |  |  |                         | (Sato, Katsumata et al. 2004, Sato, Hasegawa et al. 2005)<br><br>(Sykiotis, Plummer et al. 2010)<br><br>(Costa-Barbosa, Balasubramanian et al. 2013) |
| 2241C>A   | F747L<br>(TK)                   |  | 19.91 |  |  |  |  | x |  |  |  |  |  |  |  |  |  |  |  |                         | (Sykiotis, Plummer et al. 2010)                                                                                                                      |
| 2254delG  | Frameshift <sup>1</sup><br>(TK) |  |       |  |  |  |  | x |  |  |  |  |  |  |  |  |  |  |  |                         | (Quaynor, Bosley et al. 2016)                                                                                                                        |
| 2267G>A   | R756H<br>(TK)                   |  |       |  |  |  |  |   |  |  |  |  |  |  |  |  |  |  |  |                         | (Caronia, Martin et al. 2011)                                                                                                                        |
| 2292+3A>G | Splice site<br>(TK)             |  |       |  |  |  |  | x |  |  |  |  |  |  |  |  |  |  |  |                         | (Costa-Barbosa, Balasubramanian et al. 2013)                                                                                                         |
| 2292G>T   | Q764H <sup>1</sup><br>(TK)      |  |       |  |  |  |  | x |  |  |  |  |  |  |  |  |  |  |  |                         | (Sykiotis, Plummer et al. 2010)                                                                                                                      |
| 2302G>C   | D768H <sup>1</sup><br>(TK)      |  |       |  |  |  |  | x |  |  |  |  |  |  |  |  |  |  |  |                         | (Sykiotis, Plummer et al. 2010)                                                                                                                      |

|                          |                            |                             |       |  |  |  |   |   |   |   |  |  |  |   |  |   |  |                               |                                                               |                                |
|--------------------------|----------------------------|-----------------------------|-------|--|--|--|---|---|---|---|--|--|--|---|--|---|--|-------------------------------|---------------------------------------------------------------|--------------------------------|
|                          |                            |                             |       |  |  |  |   | x |   |   |  |  |  |   |  |   |  |                               | (Quaynor et al., 2011)                                        |                                |
| 2302G>T                  | D768Y <sup>1</sup><br>(TK) |                             | 23.5  |  |  |  |   | x |   |   |  |  |  |   |  |   |  |                               | (Sykiotis, Plummer et al. 2010)                               |                                |
| 2314C>T                  | P772S<br>(CT)              | dbSNP,<br>EVS, 1KG,<br>ExAC | 16.89 |  |  |  |   | x |   |   |  |  |  |   |  |   |  |                               | (Dode, Levilliers et al. 2003,<br>Dode, Fouveaut et al. 2007) |                                |
|                          |                            | dbSNP,<br>EVS, 1KG,<br>ExAC |       |  |  |  |   | x |   |   |  |  |  |   |  |   |  |                               | (Sykiotis, Plummer et al. 2010)                               |                                |
|                          |                            | dbSNP,<br>EVS, 1KG,<br>ExAC |       |  |  |  |   |   | x | x |  |  |  | x |  | x |  |                               |                                                               | (Hong, Hu et al. 2016)         |
|                          |                            | dbSNP,<br>EVS, 1KG,<br>ExAC |       |  |  |  |   | x |   |   |  |  |  |   |  |   |  |                               |                                                               | (Correa, Trarbach et al. 2015) |
| 2383G>A                  | V795I<br>(CT)              |                             | 23.7  |  |  |  | x |   |   |   |  |  |  |   |  |   |  | (Trarbach, Costa et al. 2006) |                                                               |                                |
| 2399C>T                  | P800L<br>(CT)              |                             | 22.3  |  |  |  |   | x |   |   |  |  |  |   |  |   |  |                               | Sarfati et al., 2013                                          |                                |
|                          |                            |                             |       |  |  |  | x |   |   |   |  |  |  |   |  |   |  |                               | C. Dodé, unpublished                                          |                                |
| 2464C>T                  | R822C<br>(CT)              |                             | 22.6  |  |  |  |   | x |   |   |  |  |  |   |  |   |  |                               | (Dode, Fouveaut et al. 2007)                                  |                                |
| [2292G>T (+)<br>2302G>T] | [Q764H (+)<br>D768Y]       |                             |       |  |  |  |   | x |   |   |  |  |  |   |  |   |  |                               | (Falardeau, Chung et al. 2008)                                |                                |

|  |      |  |  |  |  |  |  |  |  |  |  |  |  |  |  |  |  |  |  |
|--|------|--|--|--|--|--|--|--|--|--|--|--|--|--|--|--|--|--|--|
|  | (CT) |  |  |  |  |  |  |  |  |  |  |  |  |  |  |  |  |  |  |
|--|------|--|--|--|--|--|--|--|--|--|--|--|--|--|--|--|--|--|--|

X's indicate the published syndromes and phenotypes for the individual. (\*\*biallelic; <sup>1</sup>variant identified in second gene; <sup>2</sup>mosaic; <sup>3</sup>CADD Phred scores are annotated for exonic, non-benign/VUS variants when no variants in additional genes were reported for the individual. The variants with CADD Phred scores appear in protein model figures and were used in the statistical analysis; SP – signal peptide, Igl – immunoglobulin-like 1 domain, AB – acidic box, IgII – immunoglobulin-like 2 domain, IgII-IgIII – IgII/IgIII linker, IgIII – immunoglobulin-like 3 domain, JM – juxtamembrane domain, TM – transmembrane domain, ID – intramembrane domain, TK – tyrosine kinase domain, CT – C terminus; HS – Hartsfield syndrome, PS/OGD – Pfeiffer syndrome/osteoglophonic dysplasia, ECCL – encephalocraniocutaneous lipomatosis, SOD – septo-optic dysplasia, CHH/KS – normosomic congenital hypogonadotropic hypogonadism/Kallmann syndrome, DA – dental agenesis, CL/P – cleft lip and/or palate, ME – malformed ears, HL – hearing loss, LD – limb defects, CS – craniosynostosis, ID/DD – intellectual disability/developmental delay, CCA – corpus callosum agenesis, HPE – holoprosencephaly, CR – craniofacial defects, CR + LD – craniofacial defects and limb defects).



**Appendix Table 4.** Benign, likely benign and variants of unknown significance of *FGFR1* identified in control databases.

| Protein Domain | Nucleotide Change | Amino Acid Change | Reference                    | CADD Phred | Pathogenicity        |
|----------------|-------------------|-------------------|------------------------------|------------|----------------------|
| SP             | 8G>A              | S3N               | dbSNP, ExAC                  | 16.85      | Unknown significance |
| SP             | 12G>C             | W4C               | dbSNP                        | 15.92      | Unknown significance |
| SP             | 15C>T             | T5T               | dbSNP, ExAC                  | Moderate   | Unknown significance |
| SP             | 16C>T             | R6W               | dbSNP, ExAC                  | 6.675      | Likely benign        |
| SP             | 16C>G             | R6G               | dbSNP, ExAC                  | 0.007      | Likely benign        |
| SP             | 17G>C             | R6P               | dbSNP, ExAC                  | 0.755      | Likely benign        |
| SP             | 17G>A             | R6Q               | dbSNP, ExAC                  | 1.652      | Likely benign        |
| SP             | 20T>G             | L7R               | dbSNP, 1K Genomes, ExAC      | 16.9       | Unknown significance |
| SP             | 24C>T             | F8F               | dbSNP, ExAC                  | Moderate   | Unknown significance |
| SP             | 24C>A             | L8L               | dbSNP, 1K Genomes, ExAC      | Moderate   | Unknown significance |
| SP             | 25T>A             | F9I               | dbSNP, ExAC                  | 16.67      | Unknown significance |
| SP             | 25G>A             | G9S               | dbSNP, ExAC                  | 0.202      | Likely benign        |
| SP             | 27G>A             | R9R               | dbSNP, ExAC                  | Moderate   | Unknown significance |
| SP             | 29G>A             | R10K              | dbSNP, ExAC                  | 5.667      | Likely benign        |
| SP             | 31G>A             | A11T              | dbSNP, ExAC                  | 20.2       | Unknown significance |
| SP             | 32C>T             | A11V              | dbSNP, ExAC                  | 9.842      | Unknown significance |
| SP             | 33T>C             | A11A              | dbSNP, EVS, 1K Genomes, ExAC | Moderate   | Unknown significance |
| SP             | 34G>A             | E12K              | dbSNP, 1K Genomes, ExAC      | 6.525      | Likely benign        |
| SP             | 38T>C             | L13P              | dbSNP, ExAC                  | 1.342      | Unknown significance |
| SP             | 39G>A             | L13L              | dbSNP, ExAC                  | Moderate   | Unknown significance |
| SP             | 47G>T             | G16V              | dbSNP, ExAC                  | 0.091      | Likely benign        |
| SP             | 47C>T             | A16V              | dbSNP, ExAC                  | 19.68      | Unknown significance |
| SP             | 48G>A             | E16E              | dbSNP, ExAC                  | Moderate   | Unknown significance |
| SP             | 49C>T             | R17W              | dbSNP, ExAC                  | 3.941      | Unknown significance |
| SP             | 51T>C             | Y17Y              | dbSNP, ExAC                  | Moderate   | Unknown significance |
| SP             | 52C>T             | L18F              | dbSNP, ExAC                  | 17.45      | Unknown significance |

|     |        |      |                              |          |                      |
|-----|--------|------|------------------------------|----------|----------------------|
| SP  | 54C>T  | V18V | dbSNP, ExAC                  | Moderate | Unknown significance |
| SP  | 56G>C  | C19S | dbSNP, ExAC                  | 7.798    | Unknown significance |
| SP  | 60C>T  | T20T | dbSNP, ExAC                  | Moderate | Unknown significance |
| SP  | 62C>G  | A21G | dbSNP, ExAC                  | 17.22    | Likely benign        |
| SP  | 63C>T  | A21A | dbSNP, ExAC                  | Moderate | Unknown significance |
| SP  | 63C>G  | A21A | dbSNP, 1K Genomes, ExAC      | Moderate | Unknown significance |
| SP  | 64G>A  | G22R | dbSNP, 1K Genomes, ExAC      | 12.26    | Likely benign        |
| SP  | 64A>G  | R22G | dbSNP, EVS, ExAC             | 15.1     | Unknown significance |
| SP  | 66G>C  | R22S | dbSNP, EVS, 1K Genomes, ExAC | 14.85    | Benign               |
| SP  | 68C>T  | P23L | dbSNP, EVS, ExAC             | 16.88    | Unknown significance |
| SP  | 69G>A  | P23P | dbSNP, EVS, 1K Genomes, ExAC | Moderate | Benign               |
| SP  | 74C>T  | S25L | dbSNP, ExAC                  | 8.274    | Unknown significance |
| SP  | 75G>A  | P25P | dbSNP, EVS, ExAC             | Moderate | Unknown significance |
| SP  | 75A>C  | S25S | dbSNP, ExAC                  | Moderate | Unknown significance |
| SP  | 77C>T  | P26L | dbSNP, ExAC                  | 10.36    | Likely benign        |
| SP  | 79A>T  | T27S | dbSNP, 1K Genomes, ExAC      | 10.9     | Benign               |
| SP  | 79A>G  | T27A | dbSNP, 1K Genomes, ExAC      | 12.5     | Benign               |
| SP  | 83C>T  | P28L | dbSNP, EVS, ExAC             | 12.41    | Unknown significance |
| SP  | 85A>G  | N29D | dbSNP, EVS                   | 13.11    | Unknown significance |
| SP  | 86A>G  | E29G | dbSNP, ExAC                  | 15.12    | Unknown significance |
| SP  | 90C>T  | C30C | dbSNP, ExAC                  | Moderate | Unknown significance |
| SP  | 93C>T  | A31A | dbSNP, ExAC                  | Moderate | Unknown significance |
| SP  | 103G>A | G35R | dbSNP, ExAC                  | 12.05    | Likely benign        |
| SP  | 108C>T | A36A | dbSNP                        | Moderate | Unknown significance |
| SP  | 112G>A | V38M | dbSNP, EVS, ExAC             | 13.54    | Likely benign        |
| lgl | 130C>T | L44L | dbSNP, ExAC                  | Moderate | Unknown significance |
| lgl | 132G>A | L44L | dbSNP, ExAC                  | Moderate | Unknown significance |
| lgl | 136C>T | H46Y | dbSNP, ExAC                  | 8.721    | Unknown significance |
| lgl | 140C>T | P47L | dbSNP, ExAC                  | 14.82    | Unknown significance |
| lgl | 141C>T | P47P | dbSNP, ExAC                  | Moderate | Unknown significance |

|     |        |      |                         |          |                      |
|-----|--------|------|-------------------------|----------|----------------------|
| lgl | 141C>G | P47P | dbSNP, ExAC             | Moderate | Unknown significance |
| lgl | 153G>A | L51L | dbSNP, ExAC             | Moderate | Unknown significance |
| lgl | 160C>T | R54C | dbSNP, ExAC             | 20.3     | Unknown significance |
| lgl | 161G>A | R54H | dbSNP, 1K Genomes, ExAC | 20.6     | Unknown significance |
| lgl | 162C>G | R54R | dbSNP, ExAC             | Moderate | Unknown significance |
| lgl | 167G>A | R56Q | dbSNP, ExAC             | 13.78    | Unknown significance |
| lgl | 168G>T | R56R | dbSNP, ExAC             | Moderate | Unknown significance |
| lgl | 168G>A | R56R | dbSNP, EVS, ExAC        | Moderate | Unknown significance |
| lgl | 173G>A | R58Q | dbSNP, 1K Genomes, ExAC | 17.75    | Unknown significance |
| lgl | 174G>A | R58R | dbSNP                   | Moderate | Unknown significance |
| lgl | 174C>T | N58N | dbSNP, ExAC             | Moderate | Unknown significance |
| lgl | 175C>T | R59C | dbSNP, ExAC             | Moderate | Unknown significance |
| lgl | 176A>T | D59V | dbSNP, 1K Genomes, ExAC | 26.5     | Unknown significance |
| lgl | 176A>G | D59G | dbSNP, ExAC             | 21.6     | Unknown significance |
| lgl | 177C>T | D59D | dbSNP, EVS, ExAC        | Moderate | Unknown significance |
| lgl | 181G>A | V61M | dbSNP, ExAC             | 18.72    | Unknown significance |
| lgl | 182T>C | V61A | dbSNP, ExAC             | 8.293    | Unknown significance |
| lgl | 193A>C | N65H | dbSNP, ExAC             | 14.4     | Unknown significance |
| lgl | 194A>G | N65S | dbSNP, EVS, ExAC        | 4.235    | Unknown significance |
| lgl | 202C>T | R68W | dbSNP, ExAC             | 25.9     | Unknown significance |
| lgl | 207C>T | D69D | dbSNP, EVS, ExAC        | Moderate | Unknown significance |
| lgl | 208G>A | G70R | dbSNP, EVS, ExAC        | 18.91    | Unknown significance |
| lgl | 211G>T | V71L | dbSNP, 1K Genomes, ExAC | 18.32    | Unknown significance |
| lgl | 221C>T | A74V | dbSNP, EVS, ExAC        | 10.27    | Likely benign        |
| lgl | 222G>C | A74A | dbSNP, ExAC             | Moderate | Unknown significance |
| lgl | 226A>G | S76G | dbSNP, ExAC             | 9.352    | Unknown significance |
| lgl | 227G>C | S76T | dbSNP, ExAC             | 12.76    | Unknown significance |
| lgl | 230A>G | N77S | dbSNP, ExAC             | 20.6     | Unknown significance |
| lgl | 233G>A | R78H | dbSNP, ExAC             | 17.2     | Unknown significance |
| lgl | 238C>T | R80C | dbSNP, ExAC             | 28.1     | Unknown significance |

|     |        |       |                              |          |                      |
|-----|--------|-------|------------------------------|----------|----------------------|
| lgl | 239G>A | R80H  | dbSNP, 1K Genomes, ExAC      | 18.22    | Unknown significance |
| lgl | 240C>T | R80R  | dbSNP, ExAC                  | Moderate | Unknown significance |
| lgl | 241A>G | I81V  | dbSNP, EVS, ExAC             | 11.78    | Unknown significance |
| lgl | 243C>T | I81I  | dbSNP, ExAC                  | Moderate | Unknown significance |
| lgl | 245C>G | T82R  | dbSNP, ExAC                  | 13.59    | Unknown significance |
| lgl | 248G>A | G83E  | dbSNP, ExAC                  | 16.75    | Unknown significance |
| lgl | 262G>T | V88L  | dbSNP, EVS, ExAC             | 6.666    | Unknown significance |
| lgl | 264G>T | V88V  | dbSNP, ExAC                  | Moderate | Unknown significance |
| lgl | 266A>G | Q89R  | dbSNP, ExAC                  | 8.945    | Likely benign        |
| lgl | 268G>T | D90Y  | dbSNP, ExAC                  | 22.5     | Unknown significance |
| lgl | 273C>T | S91S  | dbSNP, EVS, 1K Genomes, ExAC | Moderate | Unknown significance |
| lgl | 273C>A | S91S  | dbSNP, ExAC                  | Moderate | Unknown significance |
| lgl | 274G>A | V92M  | dbSNP, ExAC                  | 19.9     | Unknown significance |
| lgl | 277C>T | P93S  | dbSNP, EVS, ExAC             | 13.55    | Unknown significance |
| lgl | 279C>T | P93P  | dbSNP, ExAC                  | Moderate | Unknown significance |
| lgl | 280G>T | A94S  | dbSNP, ExAC                  | 13.18    | Likely benign        |
| lgl | 280G>A | A94T  | dbSNP, ExAC                  | 14.35    | Likely benign        |
| lgl | 281C>A | A94E  | dbSNP, EVS                   | 1.97     | Likely benign        |
| lgl | 282A>C | A94A  | dbSNP, ExAC                  | Moderate | Unknown significance |
| lgl | 288C>T | S96S  | dbSNP, ExAC                  | Moderate | Unknown significance |
| lgl | 297T>C | Y99Y  | dbSNP, 1K Genomes, ExAC      | Moderate | Unknown significance |
| lgl | 303C>T | C101C | dbSNP, EVS, 1K Genomes, ExAC | Moderate | Unknown significance |
| lgl | 304G>A | V102I | dbSNP, EVS, 1K Genomes, ExAC | 10.95    | Benign               |
| lgl | 311G>A | S104N | dbSNP, ExAC                  | 6.568    | Likely benign        |
| lgl | 320C>T | S107L | dbSNP, EVS, 1K Genomes, ExAC | 4.294    | Benign               |
| lgl | 321G>A | S107S | dbSNP, EVS, 1K Genomes, ExAC | Moderate | Unknown significance |
| lgl | 332C>T | T111I | dbSNP, ExAC                  | 14.66    | Unknown significance |
| lgl | 333C>T | T111T | dbSNP, ExAC                  | Moderate | Unknown significance |
| lgl | 336C>T | T112T | dbSNP, EVS, 1K Genomes, ExAC | Moderate | Benign               |
| lgl | 342C>T | F114F | dbSNP, ExAC                  | Moderate | Unknown significance |

|      |        |       |                              |          |                      |
|------|--------|-------|------------------------------|----------|----------------------|
| IgI  | 345C>T | S115S | dbSNP, EVS, 1K Genomes, ExAC | Moderate | Benign               |
| AB   | 359A>G | D120G | dbSNP, ExAC                  | 20.7     | Unknown significance |
| AB   | 374C>T | S125L | dbSNP, ExAC                  | 19.09    | Unknown significance |
| AB   | 375G>A | S125S | dbSNP, 1K Genomes, ExAC      | Moderate | Benign               |
| AB   | 378G>T | E126D | dbSNP, ExAC                  | 9.827    | Unknown significance |
| AB   | 381T>G | D127E | dbSNP, ExAC                  | 20.4     | Unknown significance |
| AB   | 383A>C | D128A | dbSNP                        | 22.5     | Unknown significance |
| AB   | 388G>A | D130N | dbSNP, ExAC                  | 21       | Unknown significance |
| AB   | 394G>T | D132Y | dbSNP, ExAC                  | 28       | Unknown significance |
| AB   | 394G>C | D132H | dbSNP                        | 28.9     | Unknown significance |
| AB   | 394G>A | D132N | dbSNP, ExAC                  | 32       | Unknown significance |
| AB   | 401C>T | S134F | dbSNP, ExAC                  | 27.1     | Unknown significance |
| AB   | 403T>A | S135T | dbSNP, ExAC                  | 22.9     | Unknown significance |
| AB   | 404C>T | S135F | dbSNP, ExAC                  | 26.4     | Unknown significance |
| AB   | 405T>C | S135S | dbSNP, EVS, ExAC             | Moderate | Unknown significance |
| AB   | 414G>A | E138E | dbSNP                        | Moderate | Unknown significance |
| AB   | 415A>G | K139E | dbSNP, ExAC                  | 9.381    | Unknown significance |
| AB   | 430A>G | T144A | dbSNP, ExAC                  | 14.38    | Unknown significance |
| AB   | 431C>A | T144N | dbSNP, ExAC                  | 11.53    | Unknown significance |
| AB   | 448C>T | R150C | dbSNP, ExAC                  | 21.1     | Unknown significance |
| AB   | 449C>A | A150D | dbSNP, ExAC                  | 21.4     | Unknown significance |
| AB   | 450C>T | A150A | dbSNP, ExAC                  | Moderate | Unknown significance |
| AB   | 451G>A | V151I | dbSNP, ExAC                  | 12.68    | Unknown significance |
| AB   | 456T>C | A152A | dbSNP, EVS, ExAC             | Moderate | Unknown significance |
| AB   | 468A>T | T156T | dbSNP, ExAC                  | Moderate | Unknown significance |
| AB   | 471C>T | S157S | dbSNP, EVS                   | Moderate | Unknown significance |
| AB   | 473C>T | P158L | dbSNP, ExAC                  | 34       | Unknown significance |
| AB   | 476A>G | E159G | dbSNP, ExAC                  | 20.3     | Unknown significance |
| IgII | 496C>T | H166Y | dbSNP, ExAC                  | 16.51    | Unknown significance |
| IgII | 501A>G | A167A | dbSNP, ExAC                  | Moderate | Unknown significance |

|            |        |       |                              |          |                      |
|------------|--------|-------|------------------------------|----------|----------------------|
| IgII       | 501A>C | A167A | dbSNP, ExAC                  | Moderate | Unknown significance |
| IgII       | 507G>A | P169P | dbSNP, EVS, 1K Genomes, ExAC | Moderate | Unknown significance |
| IgII       | 540C>T | S180S | dbSNP, ExAC                  | Moderate | Unknown significance |
| IgII       | 566G>A | R189H | dbSNP, ExAC                  | 23.8     | Unknown significance |
| IgII       | 584A>G | K195R | dbSNP, ExAC                  | 14.47    | Unknown significance |
| IgII       | 600C>T | D200D | dbSNP, EVS, 1K Genomes, ExAC | Moderate | Benign               |
| IgII       | 613G>A | G205S | dbSNP                        | 36       | Unknown significance |
| IgII       | 615C>T | G205G | dbSNP, ExAC                  | Moderate | Unknown significance |
| IgII       | 636C>G | T212T | dbSNP, ExAC                  | Moderate | Unknown significance |
| IgII       | 637T>G | W213G | dbSNP                        | 25.4     | Unknown significance |
| IgII       | 645C>T | I215I | dbSNP                        | Moderate | Unknown significance |
| IgII       | 646A>G | I216V | dbSNP, ExAC                  | 13.43    | Unknown significance |
| IgII       | 648A>C | I216I | dbSNP, ExAC                  | Moderate | Unknown significance |
| IgII       | 660G>A | V220V | dbSNP, ExAC                  | Moderate | Unknown significance |
| IgII       | 663G>T | V221V | dbSNP, ExAC                  | Moderate | Unknown significance |
| IgII       | 678C>T | G226G | dbSNP                        | Moderate | Unknown significance |
| IgII       | 680A>G | N227S | dbSNP, ExAC                  | 29.2     | Unknown significance |
| IgII       | 684C>T | Y228Y | dbSNP, ExAC                  | Moderate | Unknown significance |
| IgII       | 694G>T | V232L | dbSNP, ExAC                  | 36       | Unknown significance |
| IgII       | 708C>T | Y236Y | dbSNP                        | Moderate | Unknown significance |
| IgII       | 713G>A | S238N | dbSNP, ExAC                  | 16.99    | Unknown significance |
| IgII       | 715A>G | I239V | dbSNP, ExAC                  | 16.07    | Unknown significance |
| IgII       | 719A>G | N240S | dbSNP, ExAC                  | 20.2     | Unknown significance |
| IgII       | 723C>T | H241H | dbSNP, ExAC                  | Moderate | Unknown significance |
| IgII       | 726A>G | T242T | dbSNP, ExAC                  | Moderate | Unknown significance |
| IgII       | 737A>G | D246G | dbSNP, ExAC                  | 21.7     | Unknown significance |
| IgII       | 741C>T | V247V | dbSNP, ExAC                  | Moderate | Unknown significance |
| IgII-IgIII | 742G>A | V248M | dbSNP, EVS, 1K Genomes, ExAC | 20.7     | Unknown significance |
| IgII-IgIII | 754C>A | P252T | dbSNP                        | 32       | Unknown significance |
| IgII-IgIII | 762G>C | R254R | dbSNP                        | Moderate | Unknown significance |

|       |         |       |                         |          |                      |
|-------|---------|-------|-------------------------|----------|----------------------|
| IgIII | 783G>C  | L261F | dbSNP                   | 21.2     | Unknown significance |
| IgIII | 786C>T  | P262P | dbSNP, ExAC             | Moderate | Unknown significance |
| IgIII | 787G>A  | A263T | dbSNP, ExAC             | 36       | Unknown significance |
| IgIII | 789C>T  | A263A | dbSNP, ExAC             | Moderate | Unknown significance |
| IgIII | 793A>C  | K265Q | dbSNP, ExAC             | 11.37    | Unknown significance |
| IgIII | 798A>G  | T266T | dbSNP, ExAC             | Moderate | Unknown significance |
| IgIII | 819G>C  | V273V | dbSNP, ExAC             | Moderate | Unknown significance |
| IgIII | 834G>A  | K278K | dbSNP, 1K Genomes, ExAC | Moderate | Unknown significance |
| IgIII | 837G>A  | V279V | dbSNP, ExAC             | Moderate | Unknown significance |
| IgIII | 840C>T  | Y280Y | dbSNP, ExAC             | Moderate | Unknown significance |
| IgIII | 849G>A  | P283P | dbSNP, EVS, ExAC        | Moderate | Unknown significance |
| IgIII | 854C>T  | P285L | dbSNP                   | 26.1     | Unknown significance |
| IgIII | 855G>A  | P285P | dbSNP, 1K Genomes, ExAC | Moderate | Unknown significance |
| IgIII | 870A>G  | L290L | dbSNP                   | Moderate | Unknown significance |
| IgIII | 877A>G  | I293V | dbSNP, ExAC             | 6.565    | Unknown significance |
| IgIII | 880G>A  | E294K | dbSNP, 1K Genomes, ExAC | 27.7     | Unknown significance |
| IgIII | 891G>A  | G297G | dbSNP, ExAC             | Moderate | Unknown significance |
| IgIII | 902G>A  | G301D | dbSNP, ExAC             | 31       | Unknown significance |
| IgIII | 912C>T  | N304N | dbSNP, ExAC             | Moderate | Unknown significance |
| IgIII | 921T>C  | Y307Y | dbSNP, EVS, ExAC        | Moderate | Unknown significance |
| IgIII | 923T>C  | V308A | dbSNP                   | 21.3     | Unknown significance |
| IgIII | 941C>T  | A314V | dbSNP, ExAC             | 23.4     | Unknown significance |
| IgIII | 954C>T  | T318T | dbSNP, ExAC             | Moderate | Unknown significance |
| IgIII | 957C>T  | T319T | dbSNP, ExAC             | Moderate | Unknown significance |
| IgIII | 979C>T  | H327Y | dbSNP, ExAC             | 14.87    | Unknown significance |
| IgIII | 1011G>A | G337G | dbSNP, ExAC             | Moderate | Unknown significance |
| IgIII | 1020G>C | T340T | dbSNP, ExAC             | Moderate | Unknown significance |
| IgIII | 1020G>A | T340T | dbSNP, ExAC             | Moderate | Unknown significance |
| IgIII | 1044A>C | G348G | dbSNP, ExAC             | Moderate | Unknown significance |
| IgIII | 1048T>A | S350T | dbSNP, ExAC             | 13.88    | Unknown significance |

|       |         |       |                              |          |                      |
|-------|---------|-------|------------------------------|----------|----------------------|
| IgIII | 1059T>C | S353S | dbSNP, 1K Genomes, ExAC      | Moderate | Unknown significance |
| IgIII | 1062A>G | A354A | dbSNP, ExAC                  | Moderate | Unknown significance |
| IgIII | 1068G>A | L356L | dbSNP, ExAC                  | Moderate | Unknown significance |
| IgIII | 1071C>T | T357T | dbSNP, ExAC                  | Moderate | Unknown significance |
| IgIII | 1072G>A | V358I | dbSNP, ExAC                  | 34       | Unknown significance |
| JM    | 1077G>A | L359L | dbSNP, ExAC                  | Moderate | Unknown significance |
| JM    | 1082C>A | A361D | dbSNP, ExAC                  | 16.21    | Unknown significance |
| JM    | 1085T>C | L362P | dbSNP, ExAC                  | 8.711    | Unknown significance |
| JM    | 1089A>G | E363E | dbSNP, ExAC                  | Moderate | Unknown significance |
| JM    | 1092G>A | E364E | dbSNP, EVS, ExAC             | Moderate | Unknown significance |
| JM    | 1096C>T | P366S | dbSNP, ExAC                  | 17.41    | Unknown significance |
| JM    | 1098G>A | P366P | dbSNP, EVS, 1K Genomes, ExAC | Moderate | Unknown significance |
| JM    | 1099G>T | A367S | dbSNP, ExAC                  | 10.09    | Unknown significance |
| JM    | 1106T>C | M369T | dbSNP, ExAC                  | 2.817    | Unknown significance |
| JM    | 1110C>T | T370T | dbSNP, ExAC                  | Moderate | Unknown significance |
| JM    | 1113G>A | S371S | dbSNP, ExAC                  | Moderate | Unknown significance |
| JM    | 1114C>T | P372S | dbSNP, EVS, ExAC             | 16.54    | Unknown significance |
| JM    | 1136T>C | I379T | dbSNP, EVS, ExAC             | 23.5     | Unknown significance |
| JM    | 1137C>T | I379I | dbSNP, ExAC                  | Moderate | Unknown significance |
| JM    | 1139A>G | Y380C | dbSNP, ExAC                  | 20.5     | Unknown significance |
| JM    | 1143C>T | C381C | dbSNP, ExAC                  | Moderate | Unknown significance |
| TM    | 1156C>T | L386F | dbSNP, ExAC                  | 14.83    | Unknown significance |
| TM    | 1159A>G | I387V | dbSNP, ExAC                  | 11.56    | Unknown significance |
| TM    | 1163C>T | S388F | dbSNP, EVS, ExAC             | 10.69    | Unknown significance |
| TM    | 1168A>G | M390V | dbSNP, EVS, ExAC             | 11.11    | Unknown significance |
| TM    | 1171G>A | V391M | dbSNP                        | 15.58    | Unknown significance |
| TM    | 1172T>C | V391A | dbSNP, 1K Genomes, ExAC      | 15.33    | Unknown significance |
| TM    | 1176G>A | G392G | dbSNP, EVS, 1K Genomes, ExAC | Moderate | Unknown significance |
| TM    | 1178C>T | S393L | dbSNP, EVS, ExAC             | 5.28     | Unknown significance |
| TM    | 1179G>A | S393S | dbSNP, EVS, ExAC             | Moderate | Unknown significance |



|    |         |       |                              |          |                      |
|----|---------|-------|------------------------------|----------|----------------------|
| TM | 1185C>T | I395I | dbSNP, ExAC                  | Moderate | Unknown significance |
| TM | 1186G>A | V396I | dbSNP, ExAC                  | 8.074    | Likely benign        |
| TM | 1218T>C | S406S | dbSNP, ExAC                  | Moderate | Unknown significance |
| TM | 1224C>G | F408L | dbSNP                        | 21.8     | Unknown significance |
| TM | 1227C>G | H409Q | dbSNP, ExAC                  | 10.36    | Unknown significance |
| TM | 1229G>A | S410N | dbSNP, ExAC                  | 16.06    | Unknown significance |
| TM | 1234A>G | M412V | dbSNP, ExAC                  | 3.843    | Unknown significance |
| TM | 1249C>T | L417L | dbSNP, ExAC                  | Moderate | Unknown significance |
| TM | 1257G>A | K419K | dbSNP, ExAC                  | Moderate | Unknown significance |
| TM | 1269G>A | L423L | dbSNP, EVS, 1K Genomes, ExAC | Moderate | Unknown significance |
| TM | 1270C>T | R424C | dbSNP, EVS, ExAC             | 22       | Unknown significance |
| TM | 1271G>A | R424H | dbSNP, 1K Genomes, ExAC      | 15.35    | Unknown significance |
| TM | 1274G>T | R425I | dbSNP, ExAC                  | 28       | Unknown significance |
| TM | 1287G>A | V429V | dbSNP, ExAC                  | Moderate | Unknown significance |
| TM | 1300A>G | S434G | dbSNP, EVS                   | 15.81    | Unknown significance |
| TM | 1302T>G | S434R | dbSNP, ExAC                  | 21.8     | Unknown significance |
| ID | 1304C>T | A435V | dbSNP, ExAC                  | 21.9     | Unknown significance |
| ID | 1307C>G | S436C | dbSNP, ExAC                  | 26.9     | Unknown significance |
| ID | 1308C>T | S436S | dbSNP, 1K Genomes, ExAC      | Moderate | Unknown significance |
| ID | 1316C>G | S439C | dbSNP, ExAC                  | 22.5     | Unknown significance |
| ID | 1319G>A | G440E | dbSNP, EVS, ExAC             | 18.35    | Unknown significance |
| ID | 1321G>A | V441I | dbSNP, ExAC                  | 13.22    | Unknown significance |
| ID | 1323T>G | V441V | dbSNP, ExAC                  | Moderate | Unknown significance |
| ID | 1324C>T | L442F | dbSNP, ExAC                  | 13.3     | Unknown significance |
| ID | 1324C>G | L442V | dbSNP, ExAC                  | 6.691    | Unknown significance |
| ID | 1328T>C | L443P | dbSNP, ExAC                  | 21.7     | Unknown significance |
| ID | 1329G>A | L443L | dbSNP, ExAC                  | Moderate | Unknown significance |
| ID | 1333C>T | R445W | dbSNP, ExAC                  | 19.77    | Unknown significance |
| ID | 1334G>A | R445Q | dbSNP, EVS, ExAC             | 32       | Unknown significance |
| ID | 1336C>T | P446S | dbSNP, ExAC                  | 11.09    | Unknown significance |

|    |         |       |                              |          |                      |
|----|---------|-------|------------------------------|----------|----------------------|
| ID | 1337C>T | P446L | dbSNP, ExAC                  | 14.49    | Unknown significance |
| ID | 1341A>C | S447S | dbSNP, ExAC                  | Moderate | Unknown significance |
| ID | 1343G>A | R448Q | dbSNP, ExAC                  | 27.3     | Unknown significance |
| ID | 1352C>G | S451C | dbSNP, EVS                   | 32       | Unknown significance |
| ID | 1359G>T | G453G | dbSNP, ExAC                  | Moderate | Unknown significance |
| ID | 1363C>G | P455A | dbSNP, 1K Genomes, ExAC      | 23.1     | Unknown significance |
| ID | 1366A>G | M456V | dbSNP, ExAC                  | 14.35    | Unknown significance |
| ID | 1378G>T | V460F | dbSNP, ExAC                  | 22.7     | Unknown significance |
| ID | 1385A>G | E462G | dbSNP, EVS, ExAC             | 32       | Unknown significance |
| ID | 1386G>A | E462E | dbSNP, EVS, ExAC             | Moderate | Unknown significance |
| ID | 1388A>G | Y463C | dbSNP, ExAC                  | 15.2     | Unknown significance |
| ID | 1398C>T | P466P | dbSNP, EVS, 1K Genomes, ExAC | Moderate | Unknown significance |
| ID | 1408C>T | R470C | dbSNP, ExAC                  | 17.41    | Unknown significance |
| ID | 1409G>A | R470H | dbSNP, ExAC                  | 24.9     | Unknown significance |
| ID | 1410C>T | R470R | dbSNP, ExAC                  | Moderate | Unknown significance |
| ID | 1417C>G | L473V | dbSNP, ExAC                  | 12.06    | Unknown significance |
| ID | 1420C>G | P474A | dbSNP, 1K Genomes, ExAC      | 16.86    | Unknown significance |
| ID | 1425G>A | R475R | dbSNP, EVS                   | Moderate | Unknown significance |
| ID | 1441G>A | G481S | dbSNP, ExAC                  | 36       | Unknown significance |
| TK | 1448C>G | P483R | dbSNP, ExAC                  | 26.9     | Unknown significance |
| TK | 1449C>T | P483P | dbSNP, ExAC                  | Moderate | Unknown significance |
| TK | 1449C>A | P483P | dbSNP, ExAC                  | Moderate | Unknown significance |
| TK | 1477G>A | V493M | dbSNP, ExAC                  | 18.33    | Unknown significance |
| TK | 1482G>A | L494L | dbSNP                        | Moderate | Unknown significance |
| TK | 1492A>G | I498V | dbSNP, ExAC                  | 2.903    | Likely benign        |
| TK | 1495G>A | G499R | dbSNP, ExAC                  | 34       | Unknown significance |
| TK | 1509C>T | D503D | dbSNP, ExAC                  | Moderate | Unknown significance |
| TK | 1509C>G | D503E | dbSNP, EVS, ExAC             | 13.35    | Unknown significance |
| TK | 1517A>G | N506S | dbSNP, 1K Genomes, ExAC      | 12.72    | Unknown significance |
| TK | 1519C>A | R507S | dbSNP, ExAC                  | 16.85    | Unknown significance |

|    |         |       |                         |          |                      |
|----|---------|-------|-------------------------|----------|----------------------|
| TK | 1520G>A | R507H | dbSNP, EVS, ExAC        | 21.5     | Unknown significance |
| TK | 1533G>C | V511V | dbSNP, EVS, ExAC        | Moderate | Unknown significance |
| TK | 1538T>G | V513G | dbSNP, ExAC             | 22.7     | Unknown significance |
| TK | 1538T>C | V513A | dbSNP, ExAC             | 25.7     | Unknown significance |
| TK | 1540A>G | K514E | dbSNP                   | 33       | Unknown significance |
| TK | 1544T>C | M515T | dbSNP, ExAC             | 24.3     | Unknown significance |
| TK | 1548G>A | L516L | dbSNP, ExAC             | Moderate | Unknown significance |
| TK | 1551G>A | K517K | dbSNP, ExAC             | Moderate | Unknown significance |
| TK | 1553C>T | A518V | dbSNP, ExAC             | 36       | Unknown significance |
| TK | 1554G>A | A518A | dbSNP, ExAC             | Moderate | Unknown significance |
| TK | 1595T>C | M532T | dbSNP, ExAC             | 25.5     | Unknown significance |
| TK | 1600A>G | M534V | dbSNP, 1K Genomes       | 19.43    | Unknown significance |
| TK | 1609A>G | M537V | dbSNP, ExAC             | 17.65    | Unknown significance |
| TK | 1615G>A | G539R | dbSNP                   | 36       | Unknown significance |
| TK | 1616G>A | G539E | dbSNP, ExAC             | 35       | Unknown significance |
| TK | 1621C>T | H541Y | dbSNP, 1K Genomes, ExAC | 35       | Unknown significance |
| TK | 1626G>A | K542K | dbSNP, 1K Genomes, ExAC | Moderate | Unknown significance |
| TK | 1638C>T | N546N | dbSNP, ExAC             | Moderate | Unknown significance |
| TK | 1639C>G | L547V | dbSNP, ExAC             | 24.7     | Unknown significance |
| TK | 1642C>T | L548L | dbSNP, ExAC             | Moderate | Unknown significance |
| TK | 1652G>C | C551S | dbSNP, ExAC             | 33       | Unknown significance |
| TK | 1655C>T | T552M | dbSNP, ExAC             | 34       | Unknown significance |
| TK | 1656G>A | T552T | dbSNP, 1K Genomes, ExAC | Moderate | Unknown significance |
| TK | 1669T>C | L557L | dbSNP, ExAC             | Moderate | Unknown significance |
| TK | 1677C>A | V559V | dbSNP, ExAC             | Moderate | Unknown significance |
| TK | 1679T>C | I560T | dbSNP, ExAC             | 28.9     | Unknown significance |
| TK | 1686G>A | E562E | dbSNP, ExAC             | Moderate | Unknown significance |
| TK | 1694C>G | S565C | dbSNP, ExAC             | 25.6     | Unknown significance |
| TK | 1697A>G | K566R | dbSNP, 1K Genomes       | 34       | Unknown significance |
| TK | 1701C>T | G567G | dbSNP, ExAC             | Moderate | Unknown significance |

|    |         |       |                         |          |                      |
|----|---------|-------|-------------------------|----------|----------------------|
| TK | 1710G>T | R570R | dbSNP, ExAC             | Moderate | Unknown significance |
| TK | 1711G>A | E571K | dbSNP, ExAC             | 37       | Unknown significance |
| TK | 1752C>G | C584W | dbSNP, ExAC             | 14.7     | Unknown significance |
| TK | 1757A>T | N586I | dbSNP, ExAC             | 28.9     | Unknown significance |
| TK | 1757A>C | N586T | dbSNP, ExAC             | 19.74    | Unknown significance |
| TK | 1764C>T | S588S | dbSNP, ExAC             | Moderate | Unknown significance |
| TK | 1772C>T | P591L | dbSNP, ExAC             | 25.7     | Unknown significance |
| TK | 1774G>A | E592K | dbSNP, ExAC             | 20.5     | Unknown significance |
| TK | 1775A>G | E592G | dbSNP, ExAC             | 16.34    | Unknown significance |
| TK | 1809C>T | C603C | dbSNP, EVS, ExAC        | Moderate | Unknown significance |
| TK | 1812C>G | A604A | dbSNP, ExAC             | Moderate | Unknown significance |
| TK | 1815C>T | Y605Y | dbSNP, EVS, ExAC        | Moderate | Unknown significance |
| TK | 1826G>A | R609Q | dbSNP, ExAC             | 37       | Unknown significance |
| TK | 1836G>A | E612E | dbSNP, EVS, ExAC        | Moderate | Unknown significance |
| TK | 1843G>T | A615S | dbSNP, ExAC             | 23.9     | Unknown significance |
| TK | 1845C>T | A615A | dbSNP, ExAC             | Moderate | Unknown significance |
| TK | 1845C>A | A615A | dbSNP, ExAC             | Moderate | Unknown significance |
| TK | 1869C>T | D623D | dbSNP, ExAC             | Moderate | Unknown significance |
| TK | 1875A>G | A625A | dbSNP, ExAC             | Moderate | Unknown significance |
| TK | 1888C>T | L630L | dbSNP, ExAC             | Moderate | Unknown significance |
| TK | 1904A>T | N635I | dbSNP, 1K Genomes, ExAC | 25.3     | Unknown significance |
| TK | 1904A>G | N635S | dbSNP, ExAC             | 17.22    | Unknown significance |
| TK | 1905T>C | N635N | dbSNP, ExAC             | Moderate | Unknown significance |
| TK | 1920A>G | A640A | dbSNP, ExAC             | Moderate | Unknown significance |
| TK | 1932C>T | L644L | dbSNP, ExAC             | Moderate | Unknown significance |
| TK | 1936C>A | R646R | dbSNP, ExAC             | Moderate | Unknown significance |
| TK | 1944T>C | I648I | dbSNP, ExAC             | Moderate | Unknown significance |
| TK | 1953C>T | I651I | dbSNP, EVS, ExAC        | Moderate | Unknown significance |
| TK | 1954G>A | D652N | dbSNP, ExAC             | 37       | Unknown significance |
| TK | 1956C>G | D652E | dbSNP                   | 23.5     | Unknown significance |

|    |         |       |                         |          |                      |
|----|---------|-------|-------------------------|----------|----------------------|
| TK | 1958A>G | Y653C | dbSNP, 1K Genomes, ExAC | 25.5     | Unknown significance |
| TK | 1981C>G | R661G | dbSNP, ExAC             | 23.4     | Unknown significance |
| TK | 2007C>T | P669P | dbSNP, ExAC             | Moderate | Unknown significance |
| TK | 2007C>G | P669P | dbSNP, ExAC             | Moderate | Unknown significance |
| TK | 2023C>T | R675W | dbSNP, EVS, ExAC        | 25.1     | Unknown significance |
| TK | 2024G>C | R675P | dbSNP, ExAC             | 35       | Unknown significance |
| TK | 2046T>C | D682D | dbSNP, ExAC             | Moderate | Unknown significance |
| TK | 2067C>T | L689L | dbSNP, ExAC             | Moderate | Unknown significance |
| TK | 2077A>G | I693V | dbSNP, ExAC             | 24.5     | Unknown significance |
| TK | 2091C>T | G697G | dbSNP, ExAC             | Moderate | Unknown significance |
| TK | 2094C>G | G698G | dbSNP, ExAC             | Moderate | Unknown significance |
| TK | 2097C>T | S699S | dbSNP, ExAC             | Moderate | Unknown significance |
| TK | 2106C>T | P702P | dbSNP, ExAC             | Moderate | Unknown significance |
| TK | 2121G>A | E707E | dbSNP, ExAC             | Moderate | Unknown significance |
| TK | 2127T>G | L709L | dbSNP, ExAC             | Moderate | Unknown significance |
| TK | 2130C>T | F710F | dbSNP, ExAC             | Moderate | Unknown significance |
| TK | 2141A>G | K714R | dbSNP, ExAC             | 13.72    | Unknown significance |
| TK | 2145G>T | E715D | dbSNP, ExAC             | 17.48    | Unknown significance |
| TK | 2160C>T | D720D | dbSNP, ExAC             | Moderate | Unknown significance |
| TK | 2161A>C | K721Q | dbSNP, ExAC             | 16.31    | Unknown significance |
| TK | 2163G>A | K721K | dbSNP, EVS, ExAC        | Moderate | Unknown significance |
| TK | 2165C>A | P722H | dbSNP                   | 26.9     | Unknown significance |
| TK | 2168G>A | S723N | dbSNP, ExAC             | 16.49    | Unknown significance |
| TK | 2172C>T | N724N | dbSNP, ExAC             | Moderate | Unknown significance |
| TK | 2181C>T | N727N | dbSNP, ExAC             | Moderate | Unknown significance |
| TK | 2182G>A | E728K | dbSNP, ExAC             | 27.3     | Unknown significance |
| TK | 2191A>G | M731V | dbSNP, 1K Genomes       | 15.3     | Unknown significance |
| TK | 2201G>A | R734Q | dbSNP, ExAC             | 21.2     | Unknown significance |
| TK | 2202G>T | R734R | dbSNP, ExAC             | Moderate | Unknown significance |
| TK | 2220G>A | V740V | dbSNP, ExAC             | Moderate | Unknown significance |

|    |         |       |                              |          |                      |
|----|---------|-------|------------------------------|----------|----------------------|
| TK | 2237C>A | T746N | dbSNP, ExAC                  | 22.5     | Unknown significance |
| TK | 2238C>T | T746T | dbSNP, ExAC                  | Moderate | Unknown significance |
| TK | 2259C>T | D753D | dbSNP, ExAC                  | Moderate | Unknown significance |
| TK | 2262G>A | L754L | dbSNP, EVS, 1K Genomes, ExAC | Moderate | Benign               |
| TK | 2271C>T | I757I | dbSNP, ExAC                  | Moderate | Unknown significance |
| TK | 2272G>A | V758M | dbSNP, 1K Genomes, ExAC      | 18.9     | Unknown significance |
| TK | 2277C>G | A759A | dbSNP, EVS, ExAC             | Moderate | Unknown significance |
| TK | 2278T>C | L760L | dbSNP, EVS, ExAC             | Moderate | Unknown significance |
| TK | 2288A>G | N763S | dbSNP                        | 14.91    | Unknown significance |
| TK | 2289C>G | N763K | dbSNP, ExAC                  | 16.55    | Unknown significance |
| CT | 2298C>T | Y766Y | dbSNP, EVS, ExAC             | Moderate | Unknown significance |
| CT | 2300T>G | L767R | dbSNP                        | 22.6     | Unknown significance |
| CT | 2305C>G | L769V | dbSNP                        | 18.75    | Unknown significance |
| CT | 2309C>T | S770F | dbSNP, ExAC                  | 27.2     | Unknown significance |
| CT | 2314C>T | P772S | dbSNP, EVS, 1K Genomes, ExAC | 16.89    | Benign               |
| CT | 2331C>G | S777S | dbSNP, ExAC                  | Moderate | Unknown significance |
| CT | 2337C>T | S779S | dbSNP, ExAC                  | Moderate | Unknown significance |
| CT | 2339T>C | F780S | dbSNP, ExAC                  | 12.46    | Unknown significance |
| CT | 2343C>T | P781P | dbSNP, EVS, ExAC             | Moderate | Unknown significance |
| CT | 2344G>A | D782N | dbSNP, ExAC                  | 21.4     | Unknown significance |
| CT | 2346C>T | D782D | dbSNP, 1K Genomes, ExAC      | Moderate | Unknown significance |
| CT | 2350C>T | R784W | dbSNP, EVS                   | 21.3     | Unknown significance |
| CT | 2351G>A | R784Q | dbSNP, ExAC                  | 23.1     | Unknown significance |
| CT | 2357C>G | S786C | dbSNP, ExAC                  | 21.5     | Unknown significance |
| CT | 2358T>C | S786S | dbSNP, ExAC                  | Moderate | Unknown significance |
| CT | 2360C>T | T787M | dbSNP, 1K Genomes, ExAC      | 23.5     | Unknown significance |
| CT | 2361G>A | T787T | dbSNP, EVS, ExAC             | Moderate | Unknown significance |
| CT | 2367C>T | S789S | dbSNP, ExAC                  | Moderate | Unknown significance |
| CT | 2382C>T | S794S | dbSNP, EVS, 1K Genomes, ExAC | Moderate | Unknown significance |
| CT | 2393A>G | H798R | dbSNP, ExAC                  | 17.36    | Unknown significance |

|    |         |       |                         |          |                      |
|----|---------|-------|-------------------------|----------|----------------------|
| CT | 2400G>A | P800P | dbSNP, ExAC             | Moderate | Unknown significance |
| CT | 2406C>T | P802P | dbSNP, ExAC             | Moderate | Unknown significance |
| CT | 2406C>A | P802P | dbSNP, 1K Genomes, ExAC | Moderate | Unknown significance |
| CT | 2407G>T | E803* | dbSNP, ExAC             | 45       | Unknown significance |
| CT | 2415C>T | P805P | dbSNP, ExAC             | Moderate | Unknown significance |
| CT | 2417G>A | C806Y | dbSNP, ExAC             | 25.9     | Unknown significance |
| CT | 2418C>A | C806* | dbSNP, ExAC             | 44       | Unknown significance |
| CT | 2424C>G | P808P | dbSNP, EVS, ExAC        | Moderate | Unknown significance |
| CT | 2425C>T | R809* | dbSNP, ExAC             | 45       | Unknown significance |
| CT | 2426G>A | R809Q | dbSNP, ExAC             | 9.862    | Unknown significance |
| CT | 2428C>A | H810N | dbSNP, ExAC             | 14.66    | Unknown significance |
| CT | 2432C>G | P811R | dbSNP, ExAC             | 25.6     | Unknown significance |
| CT | 2433A>G | P811P | dbSNP, ExAC             | Moderate | Unknown significance |
| CT | 2439G>A | Q813Q | dbSNP, ExAC             | Moderate | Unknown significance |
| CT | 2452G>A | G818R | dbSNP                   | 29.5     | Unknown significance |
| CT | 2457C>T | L819L | dbSNP, ExAC             | Moderate | Unknown significance |
| CT | 2461C>T | R821C | dbSNP, ExAC             | 19.82    | Unknown significance |
| CT | 2462G>A | R821H | dbSNP, ExAC             | 19.11    | Unknown significance |
| CT | 2465G>A | R822H | dbSNP, ExAC             | 23       | Unknown significance |

These variants were identified in the ExAC, dbSNP, 1000 Genomes (1K Genomes) and EVS databases and scored as non-pathogenic using the Deafness Variation Database strategy (see methods). These variants were used in the statistical analysis to compare locations of non-pathogenic variants to those identified in individuals with a disease phenotype. “Moderate” CADD Phred scores indicate synonymous changes. (Igl – immunoglobulin-like 1 domain, IgII – immunoglobulin-like 2 domain, IgIII – immunoglobulin-like 3 domain, TM – transmembrane domain, TK – tyrosine kinase domain)

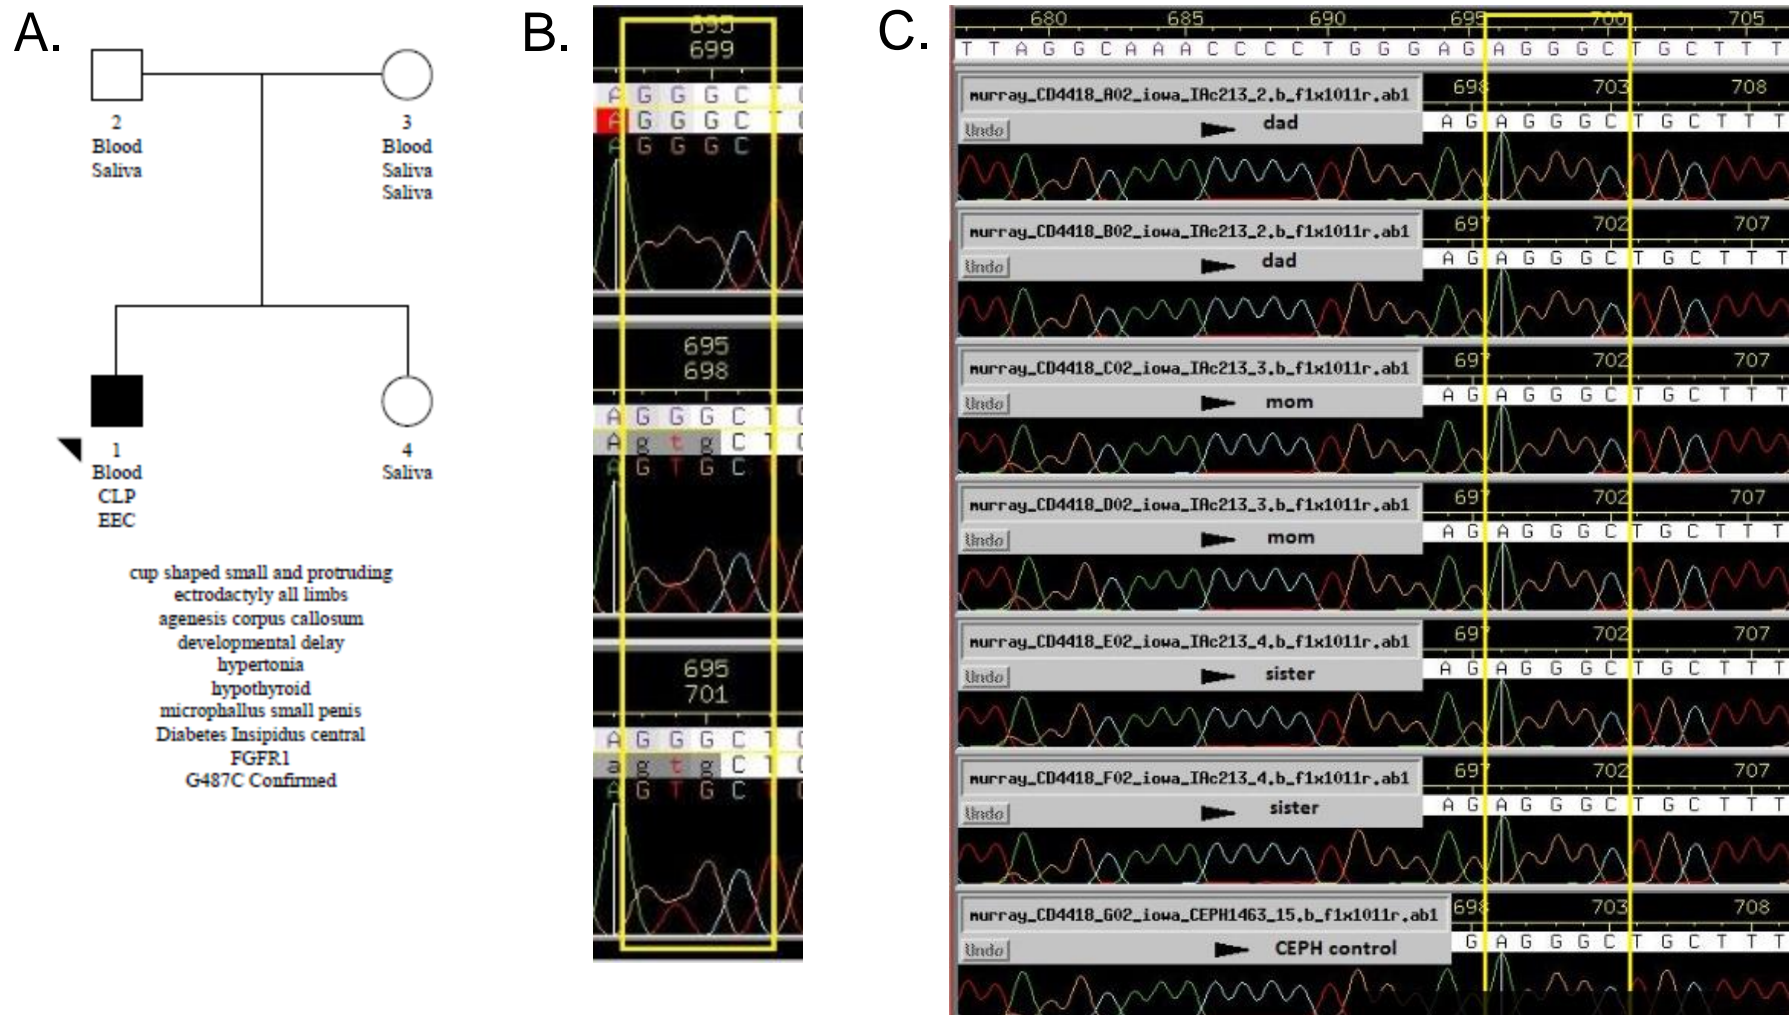

**Appendix Figure 1.** Pedigree and chromatograms of the proband with Hartsfield syndrome. A. Pedigree showing sample types and nuclear family of proband with a phenotypic summary. B. Chromatogram showing the control sequence (top sequence; GGG) followed by the detected 1459G>T (G487C) in two sequence reads of the proband's DNA. C. Chromatograms showing the presence of the consensus sequence in unaffected dad, mom and sister compared to a control sample (CEPH) all wildtype at nucleotide.



**Appendix Figure 2a: Hartsfield Syndrome**

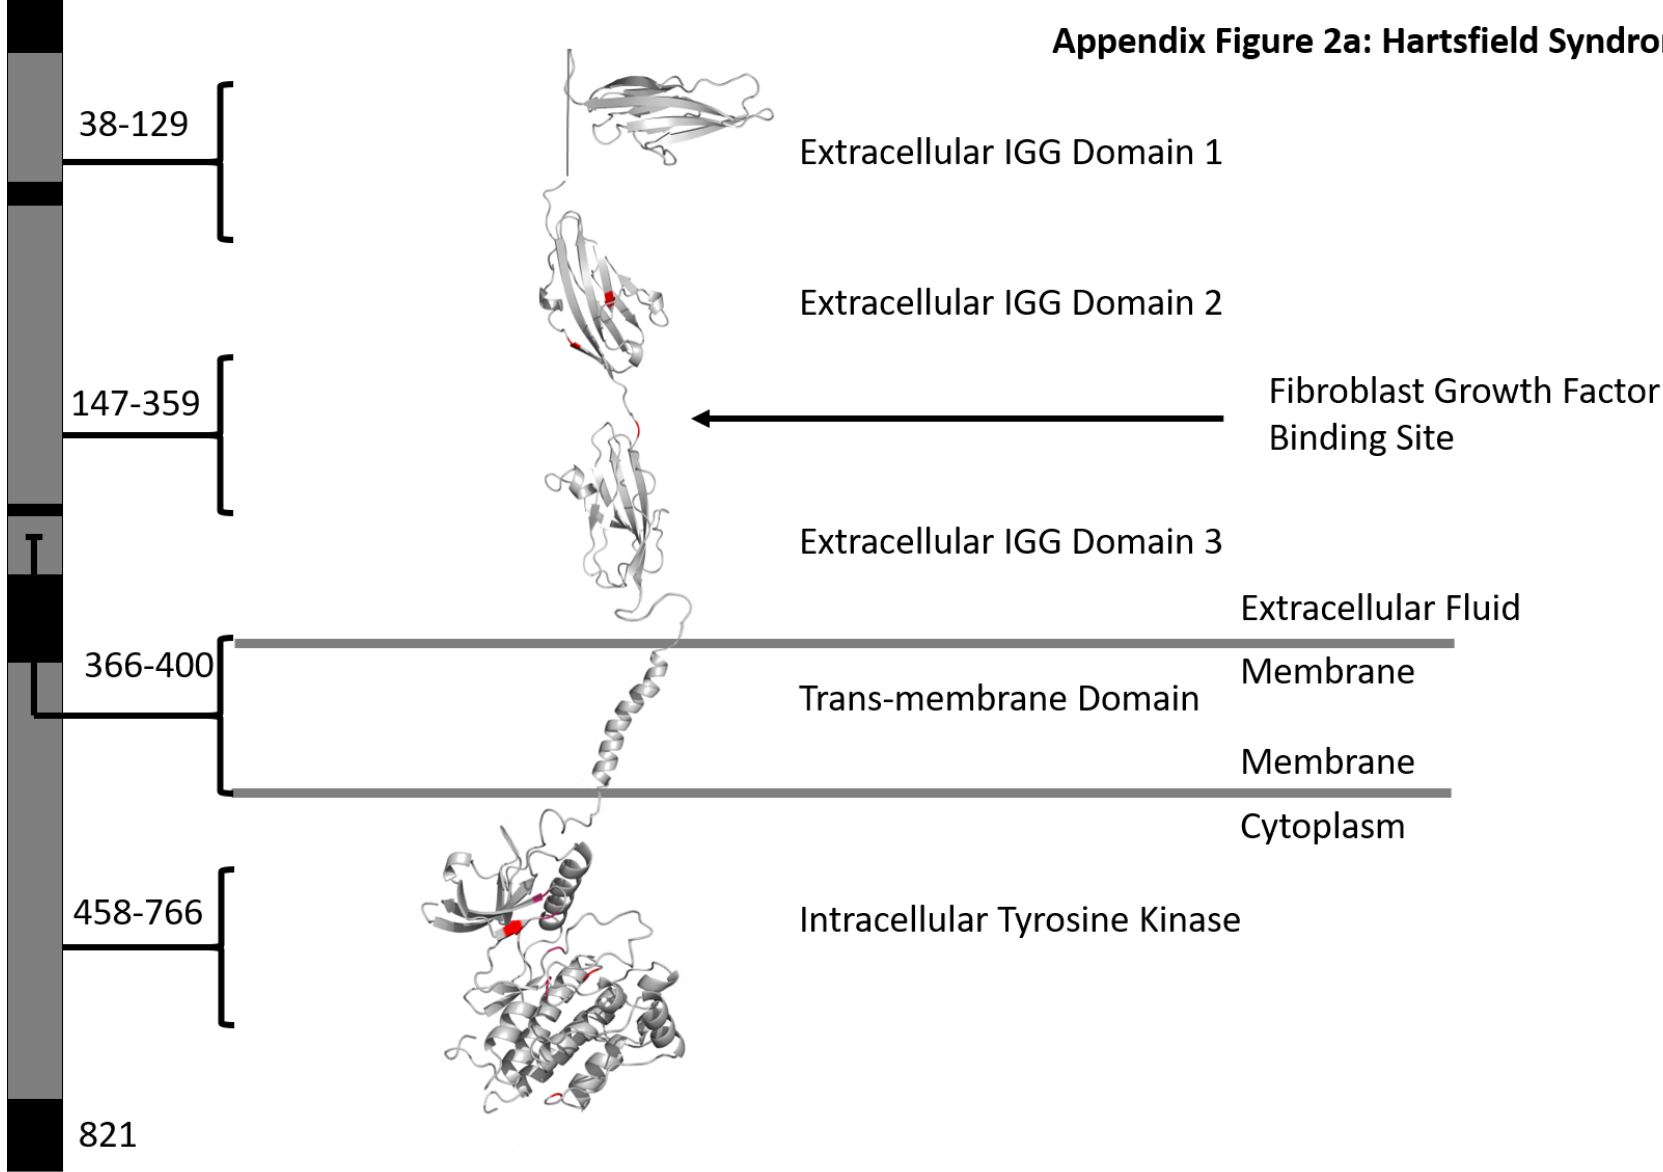

# Appendix Figure 2b: Pfeiffer Syndrome/Osteoglophonic Dysplasia

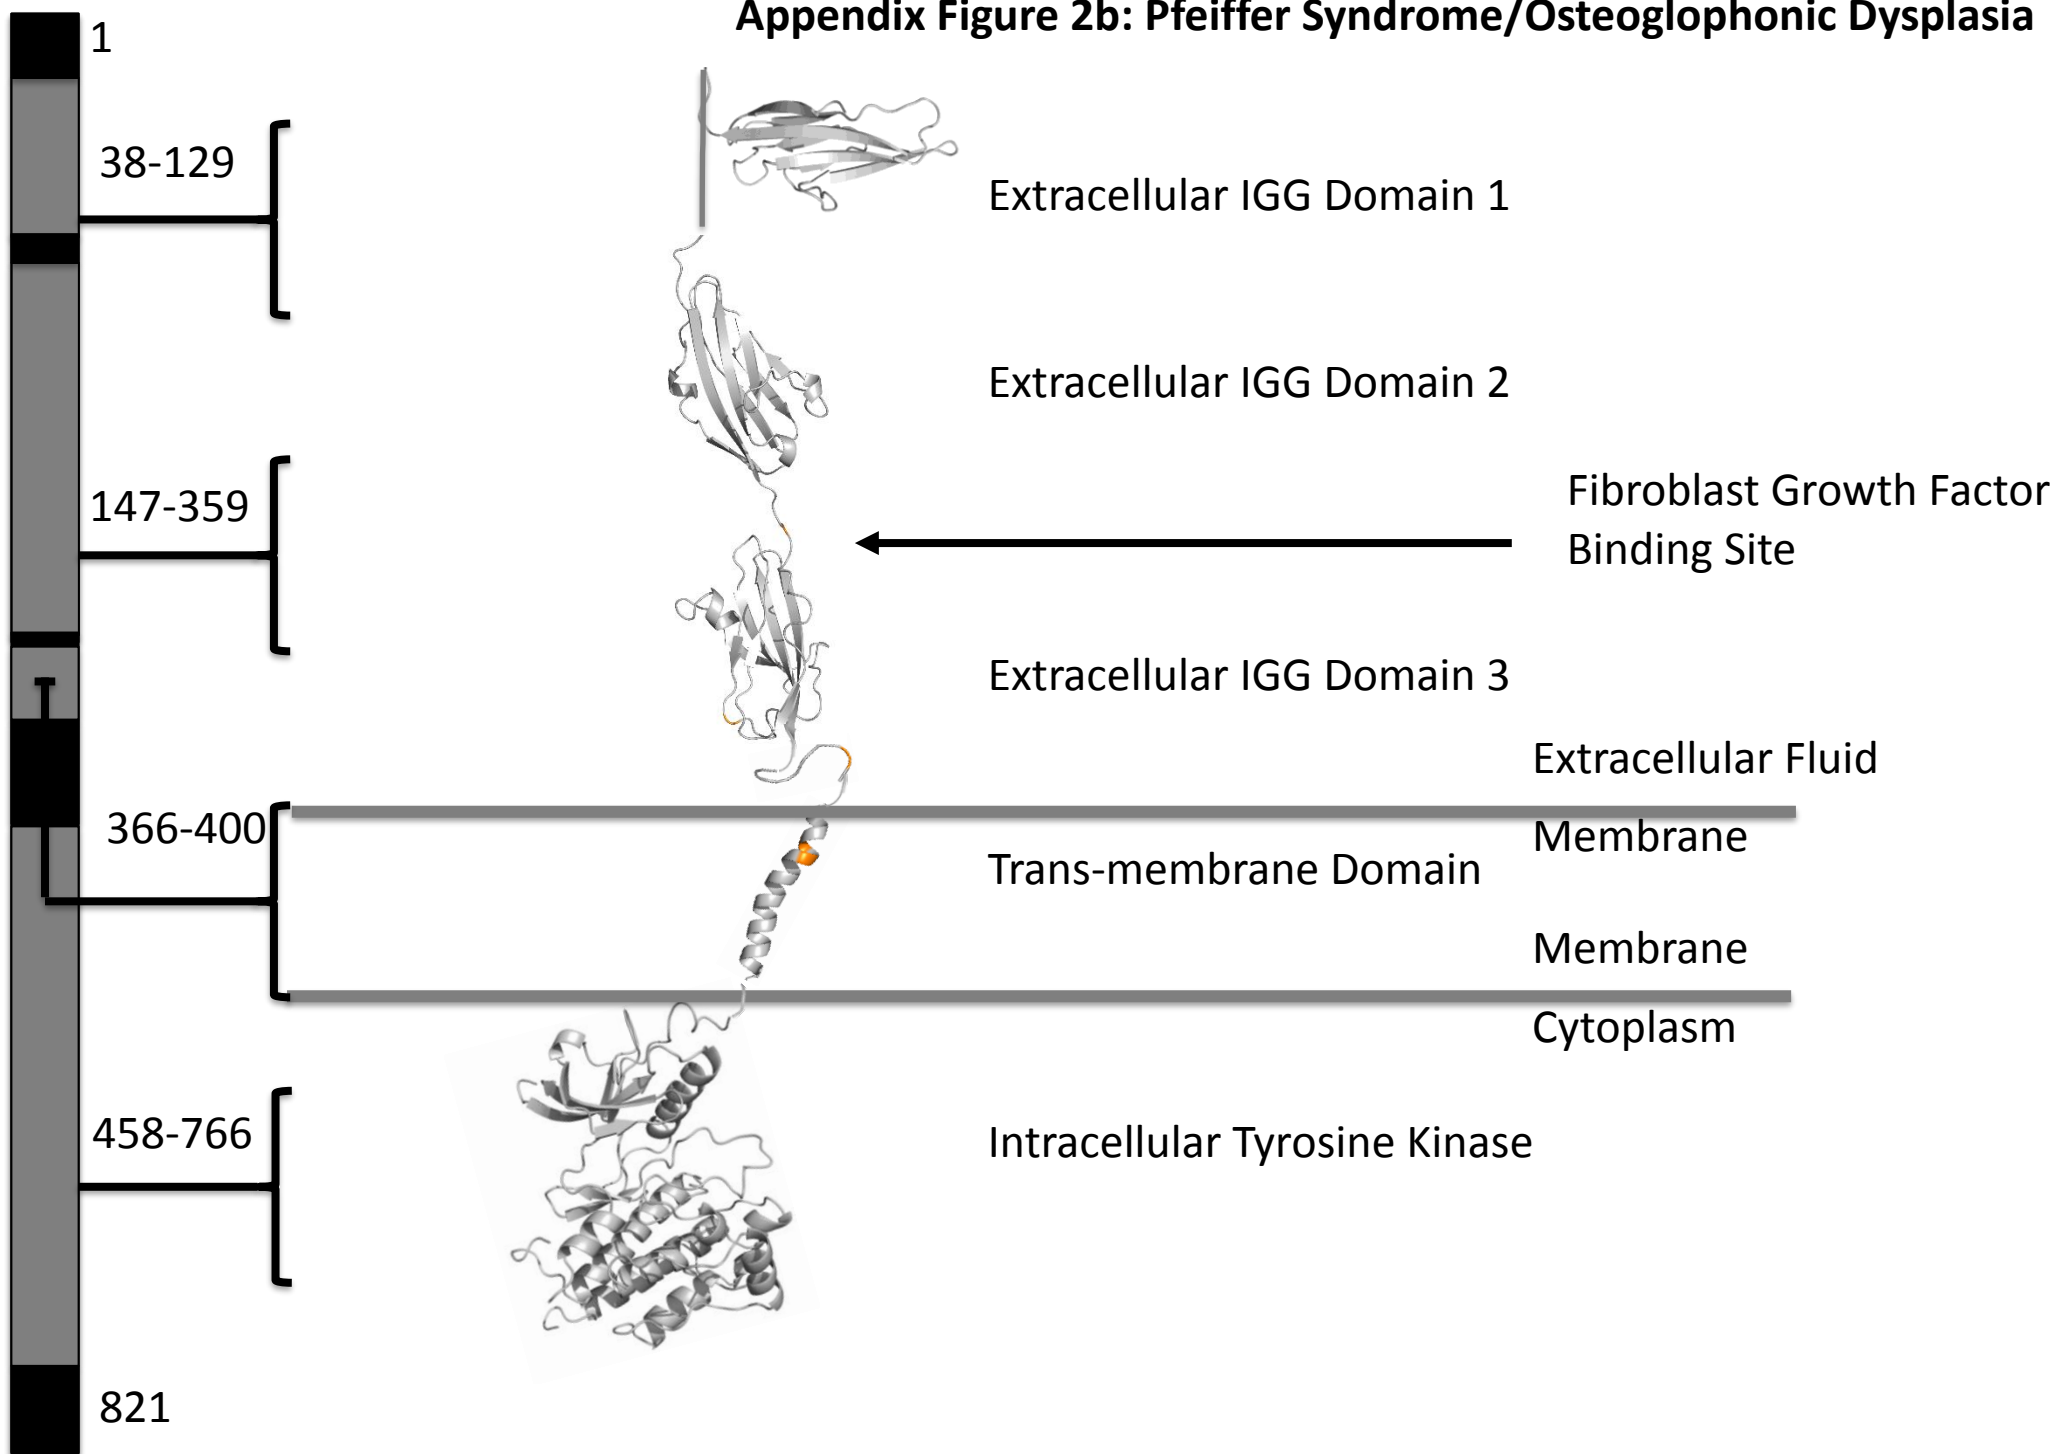

**Appendix Figure 2c: Encephalocraniocutaneous Lipomatosis**

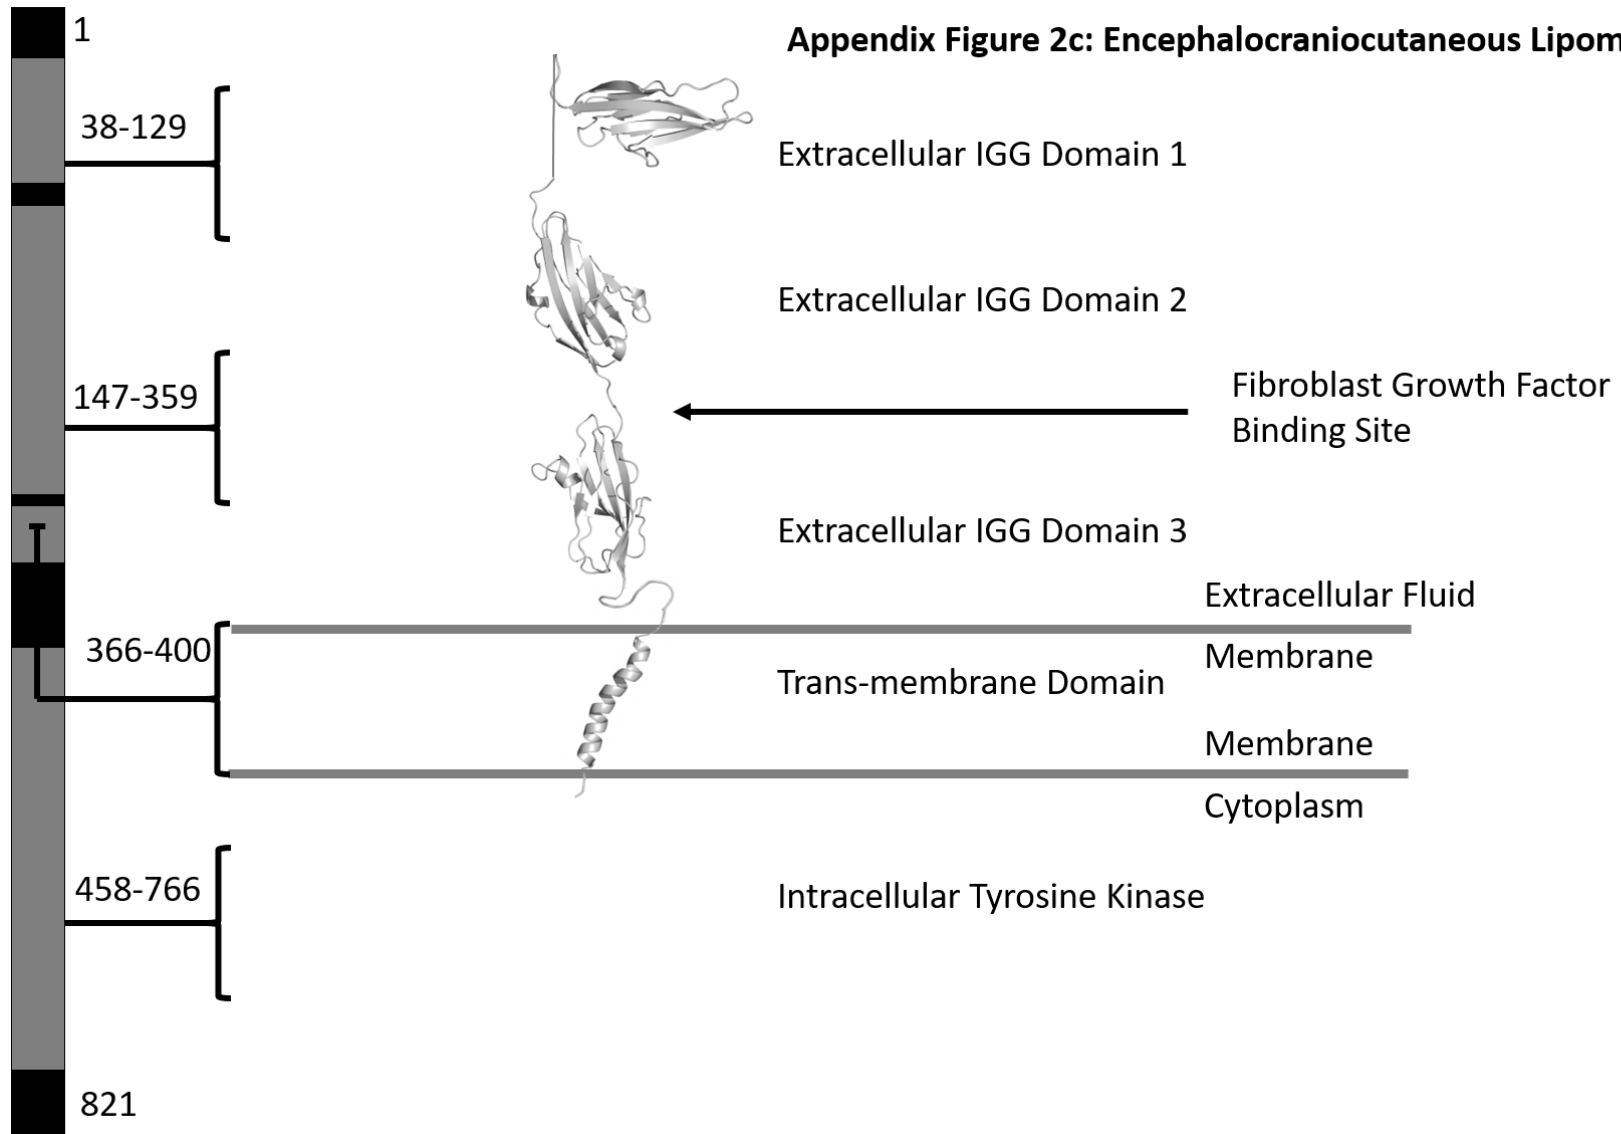

**Appendix Figure 2d: Septo-optic Dysplasia**

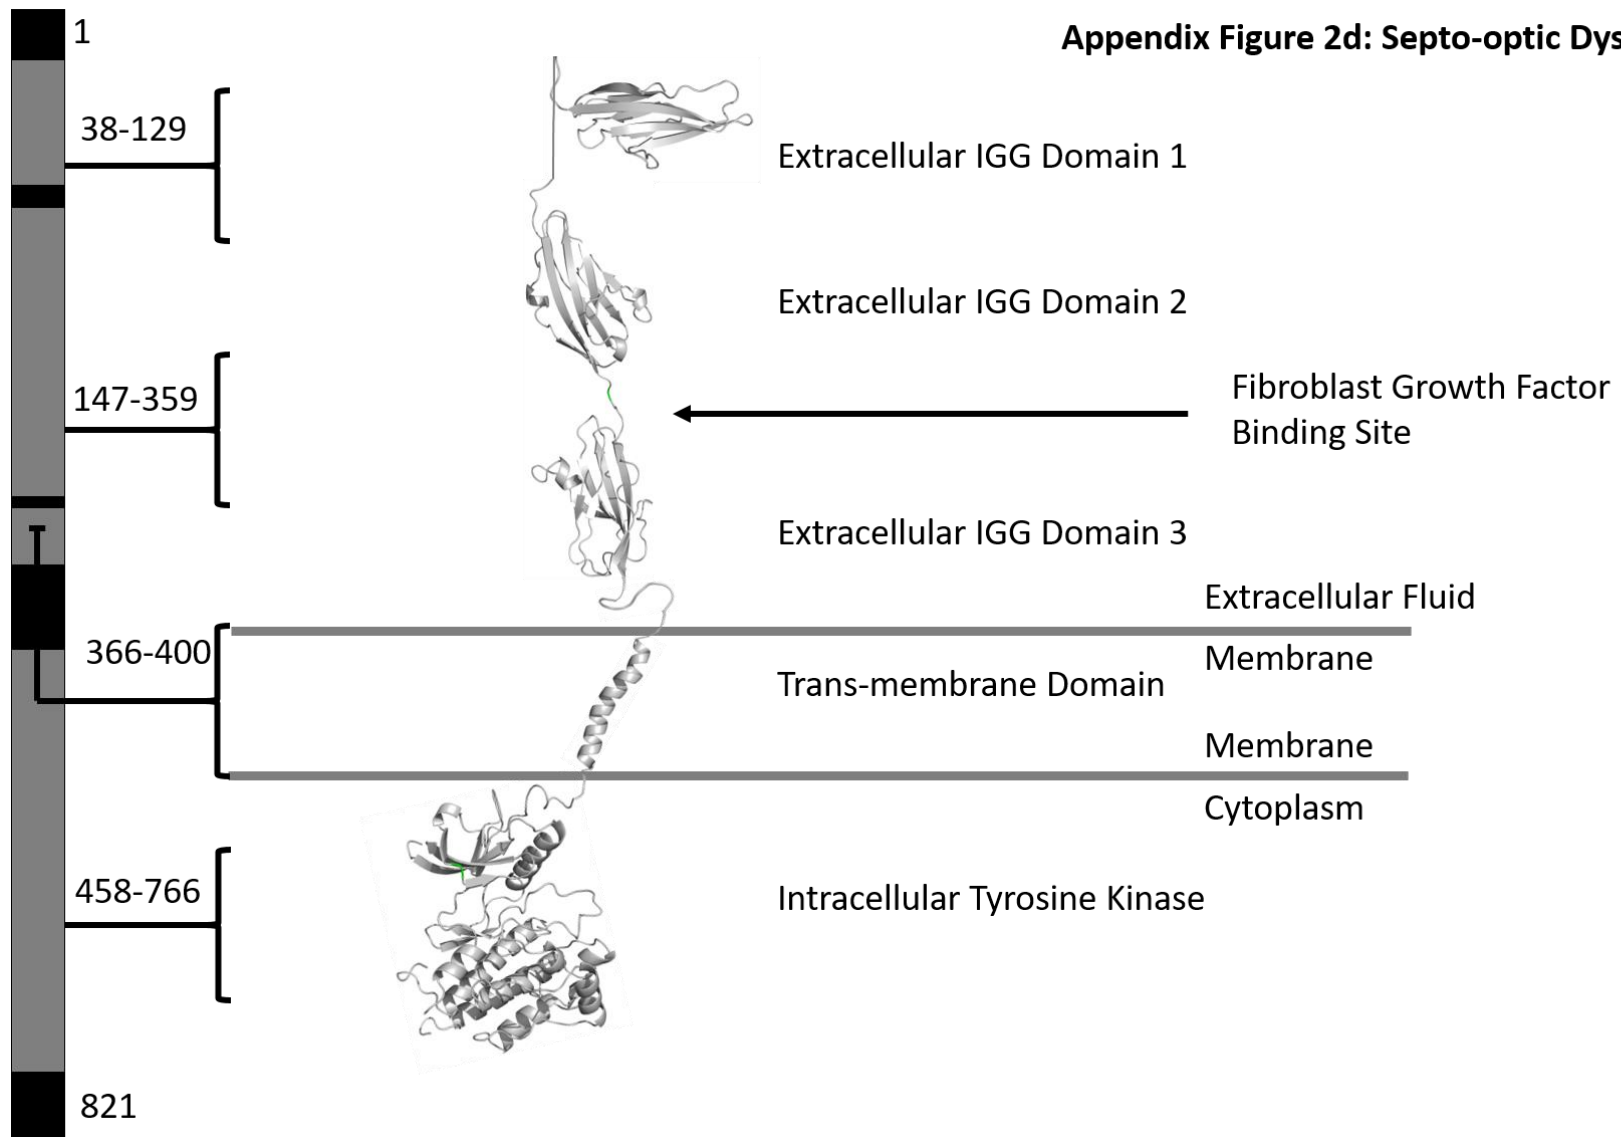

1 **Appendix Figure 2e: Normosomic Congenital Hypogonadotropic Hypogonadism/Kallmann Syndrome**

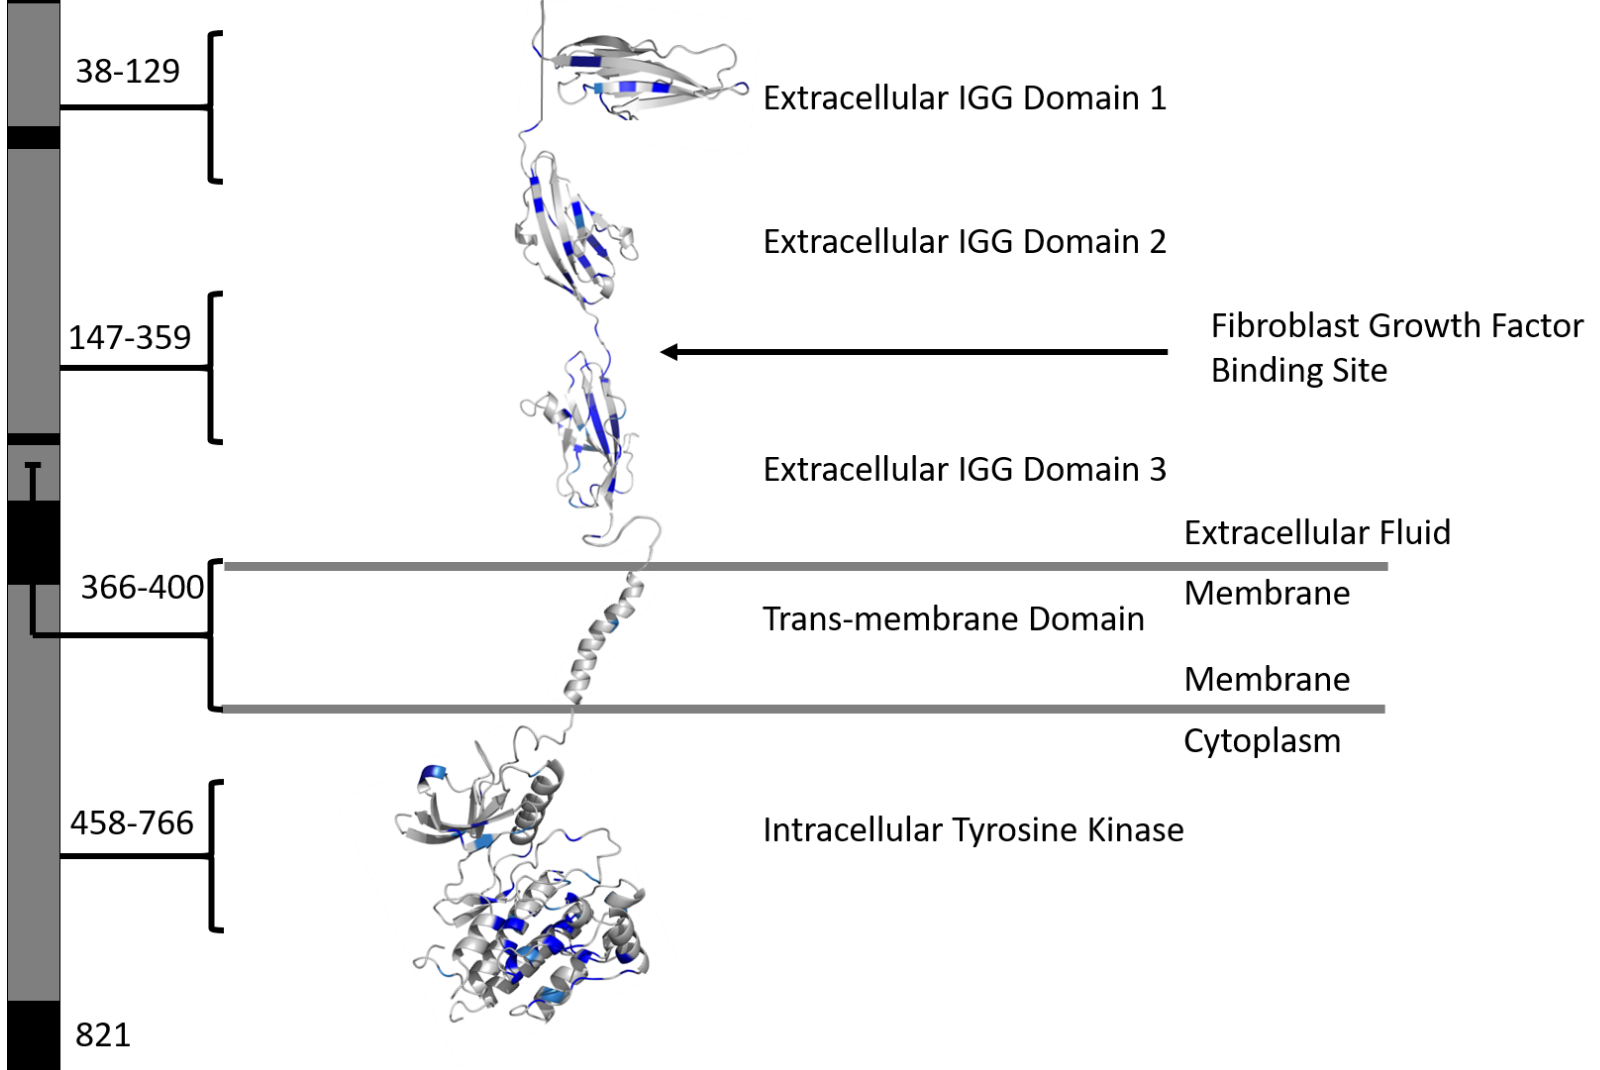

**Appendix Figure 2f: Dental Agnesis**

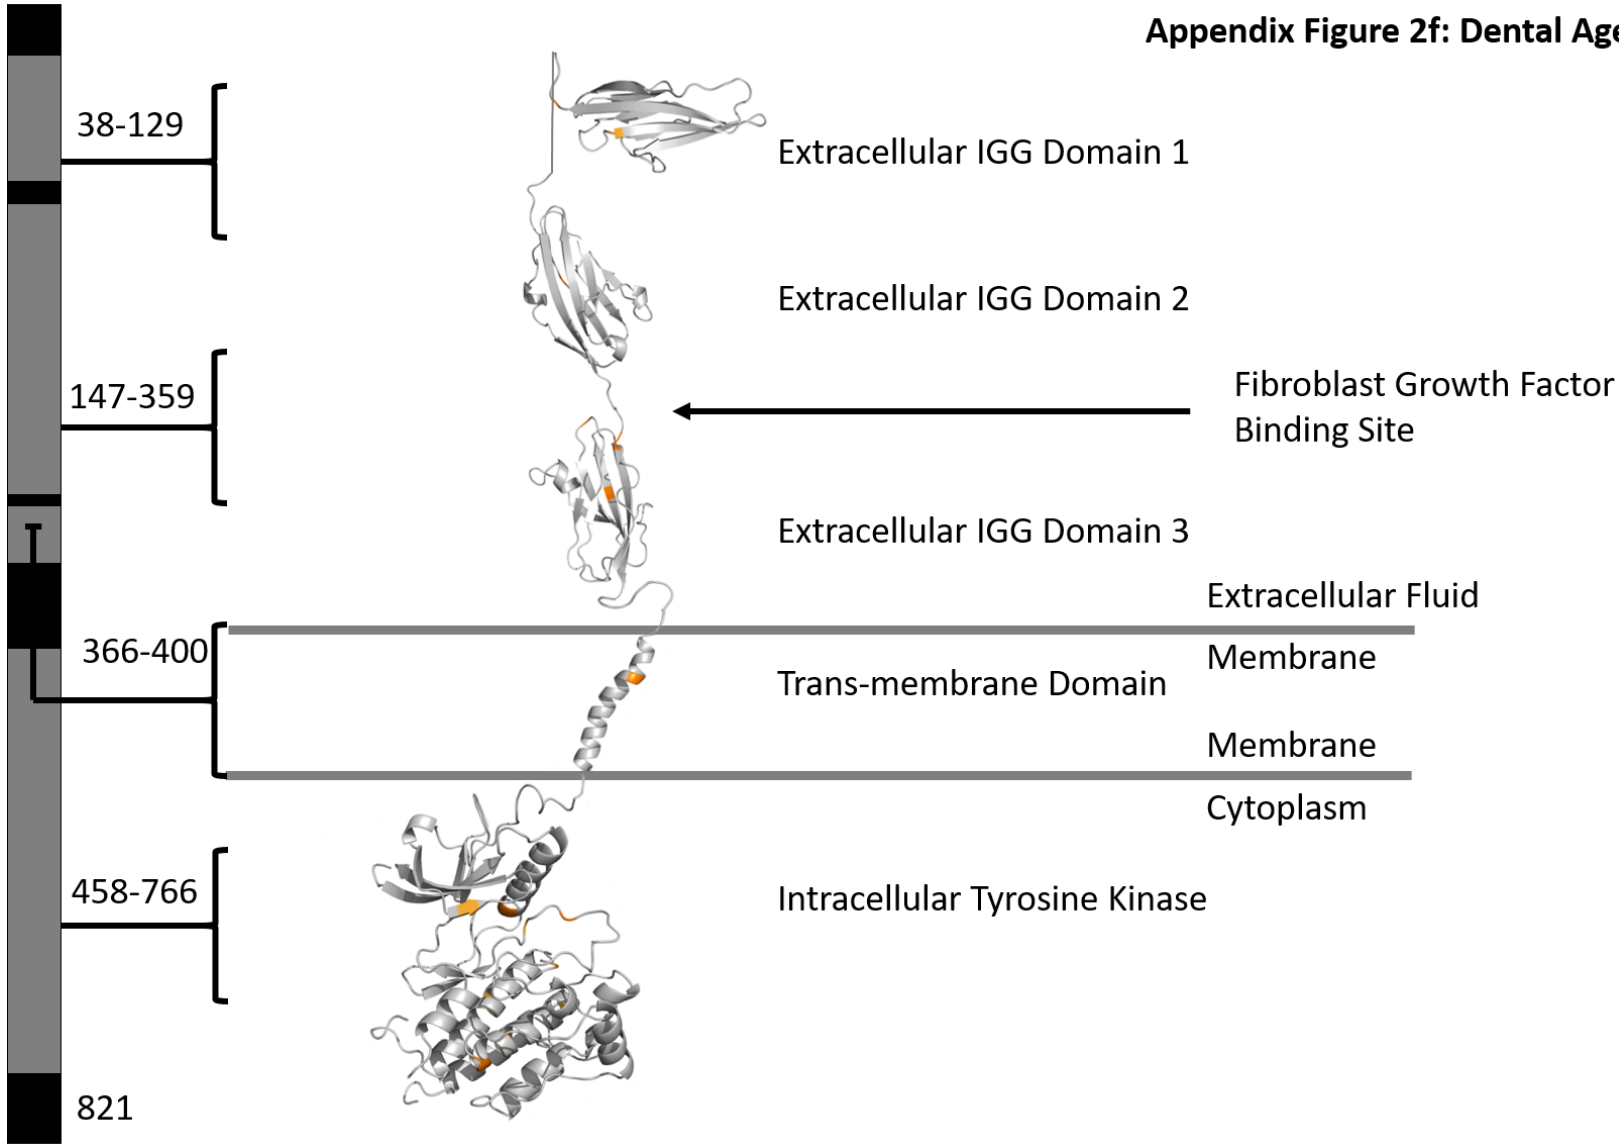

**Appendix Figure 2g: Cleft Lip and/or Palate**

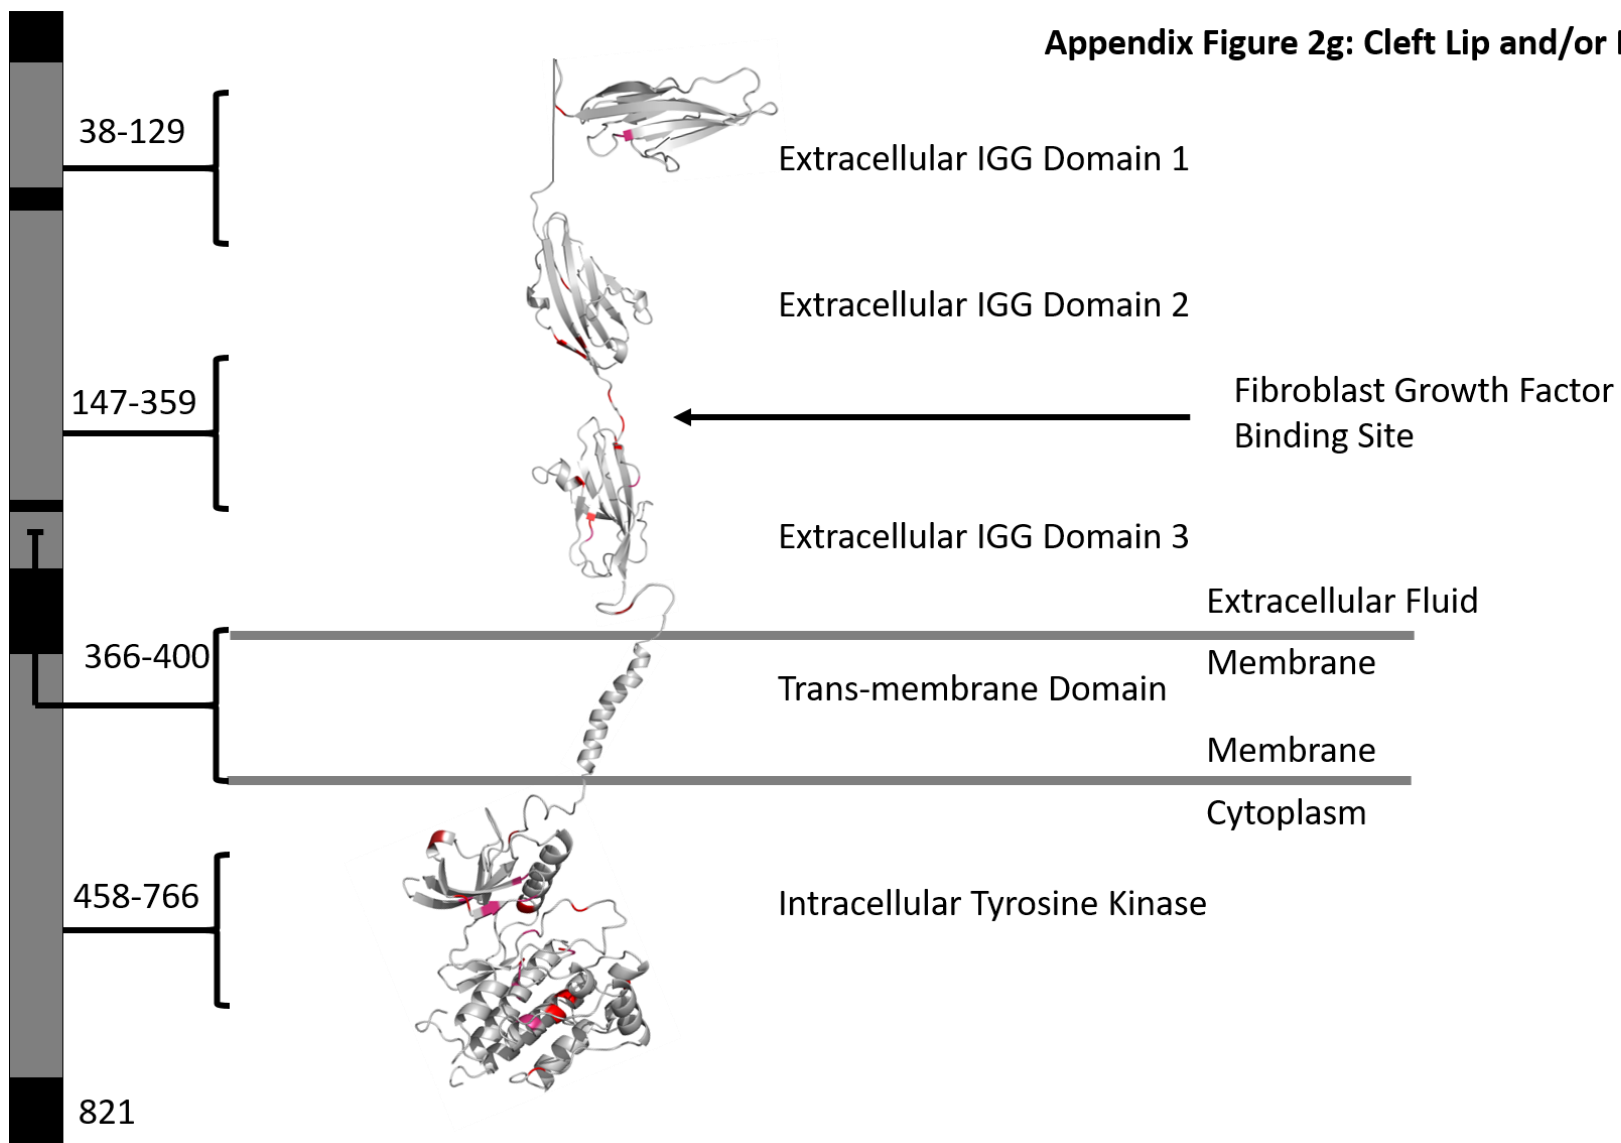

**Appendix Figure 2h: Malformed Ears**

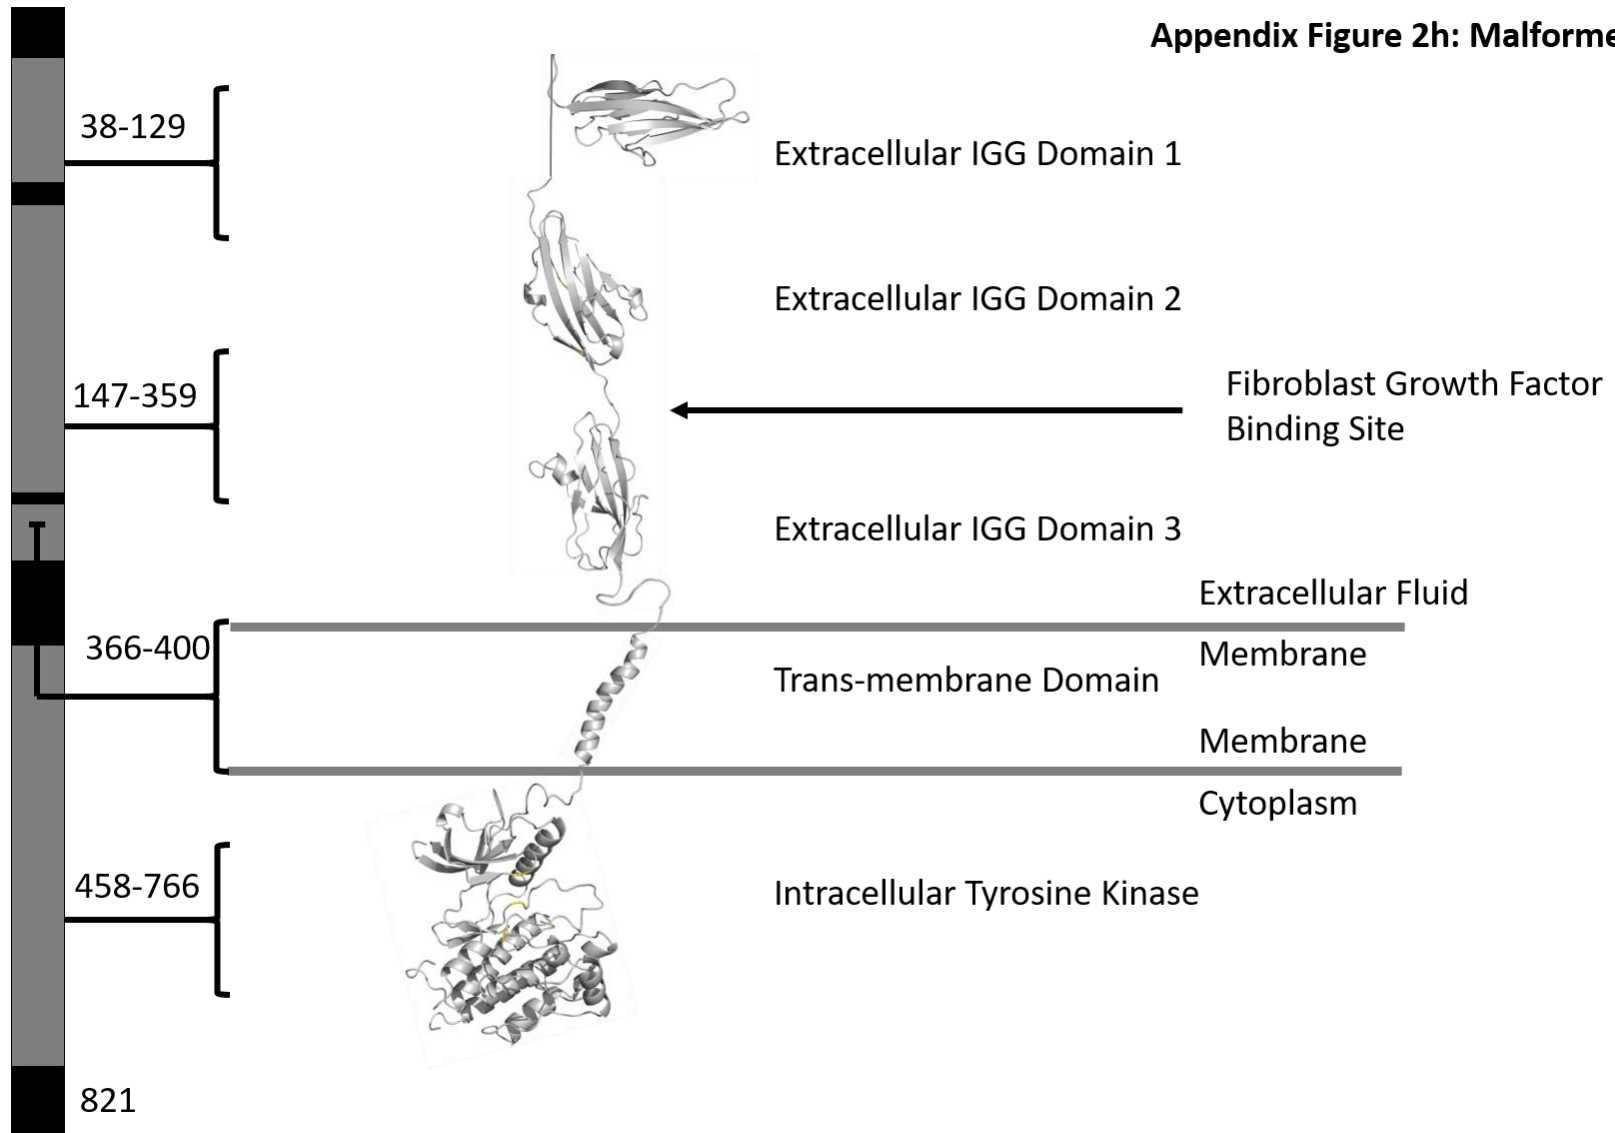



Appendix Figure 2i: Hearing Loss

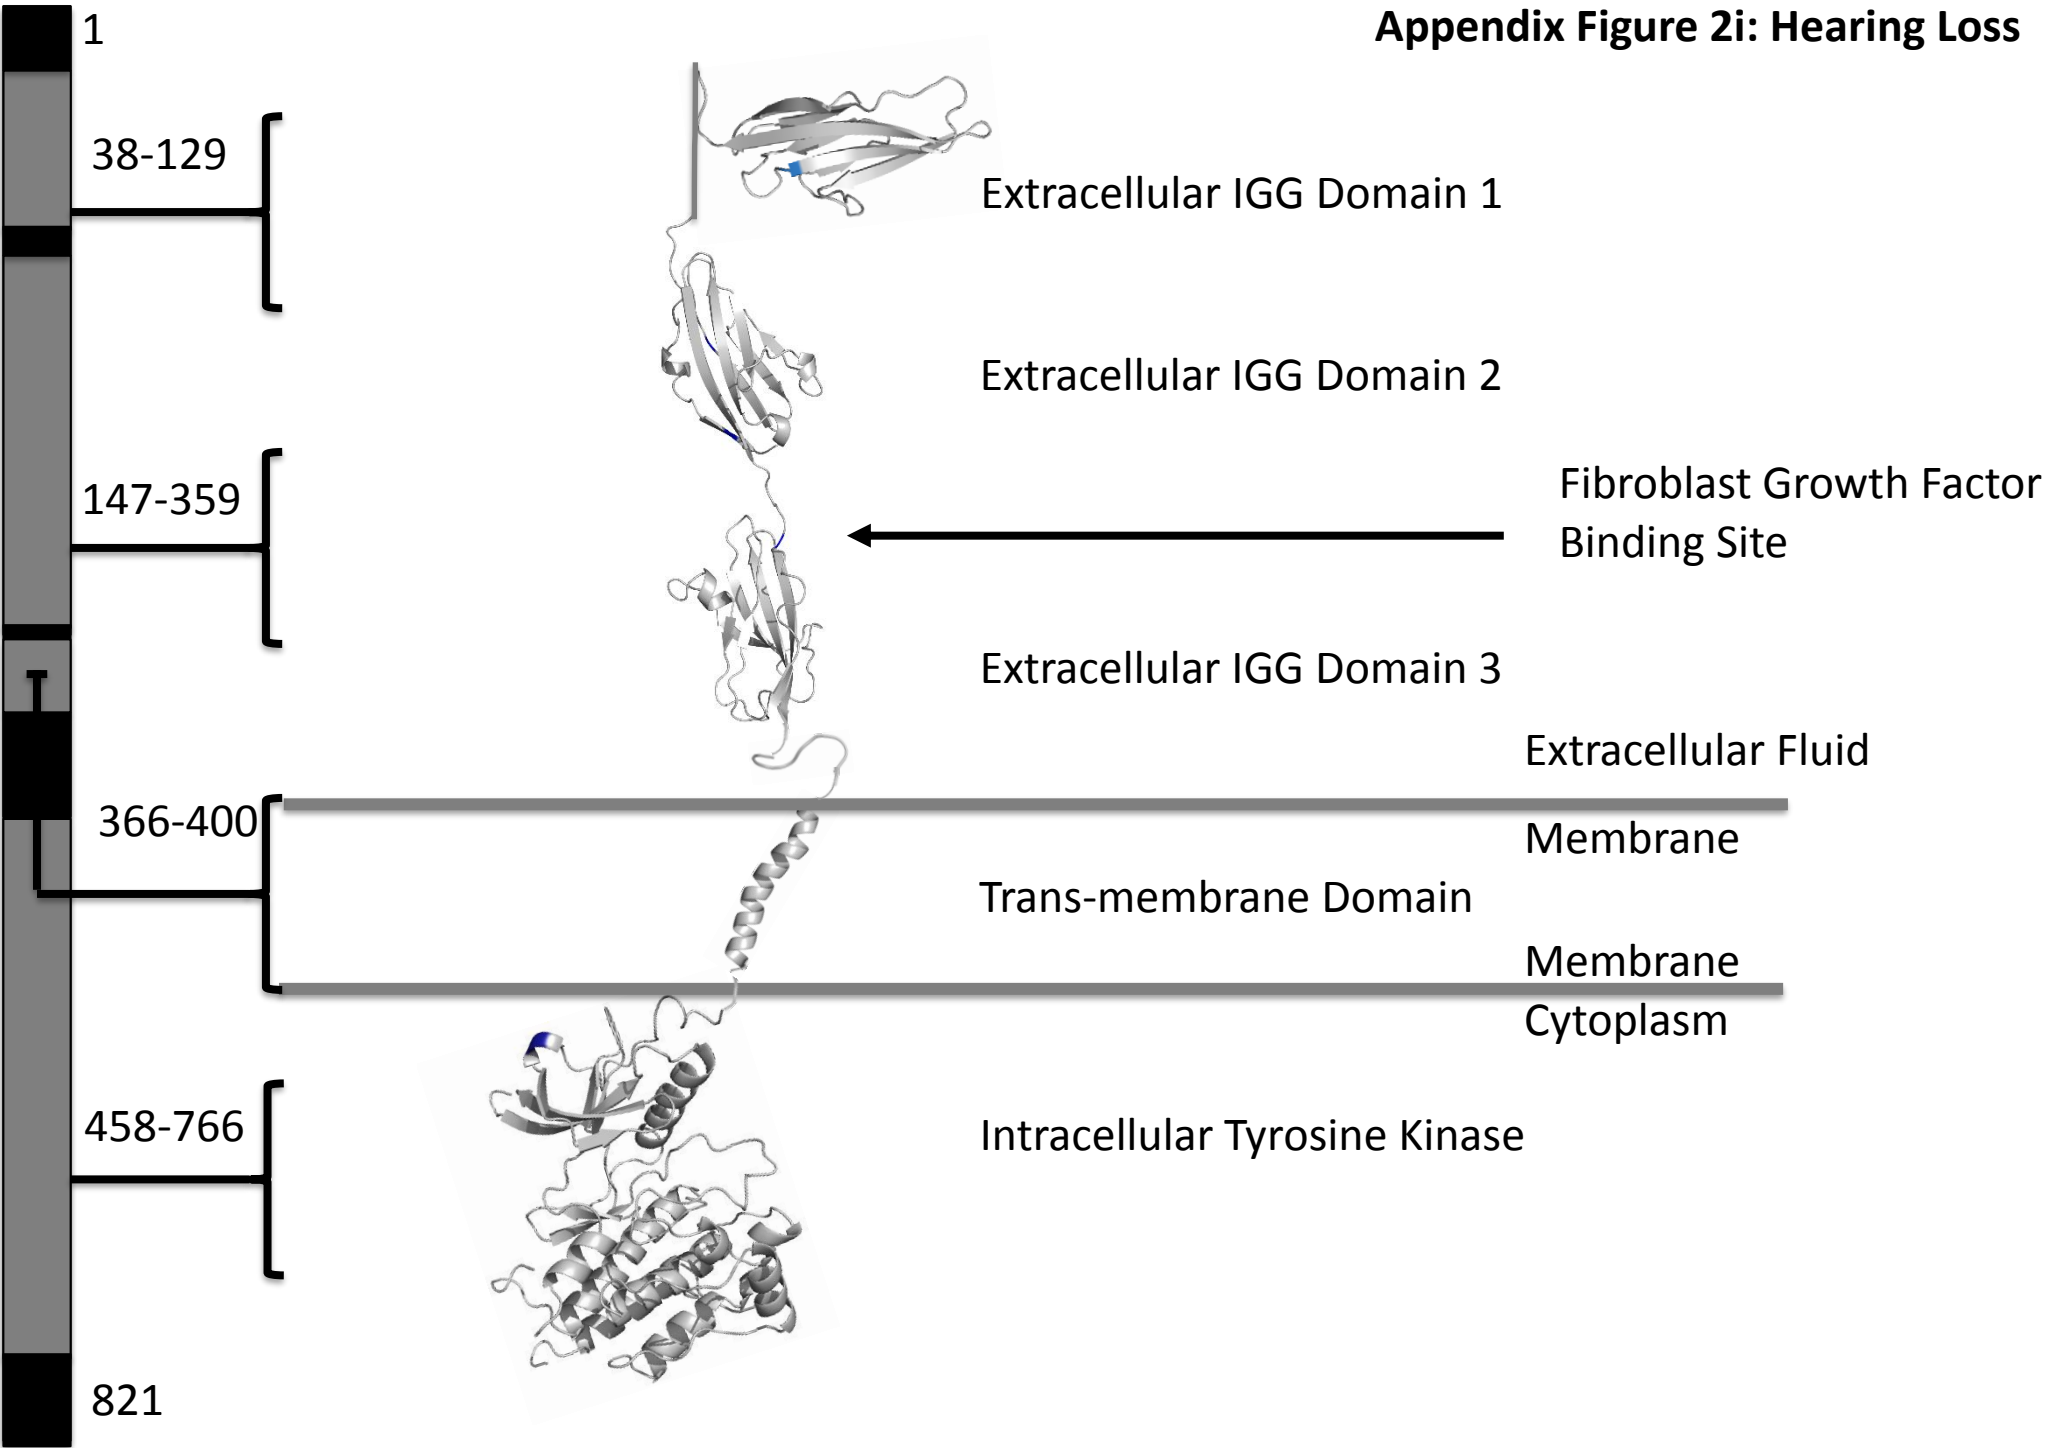

1

38-129

147-359

366-400

458-766

821

Extracellular IGG Domain 1

Extracellular IGG Domain 2

Extracellular IGG Domain 3

Trans-membrane Domain

Intracellular Tyrosine Kinase

Fibroblast Growth Factor Binding Site

Extracellular Fluid

Membrane

Membrane  
Cytoplasm

Appendix Figure 2j: Limb Defects

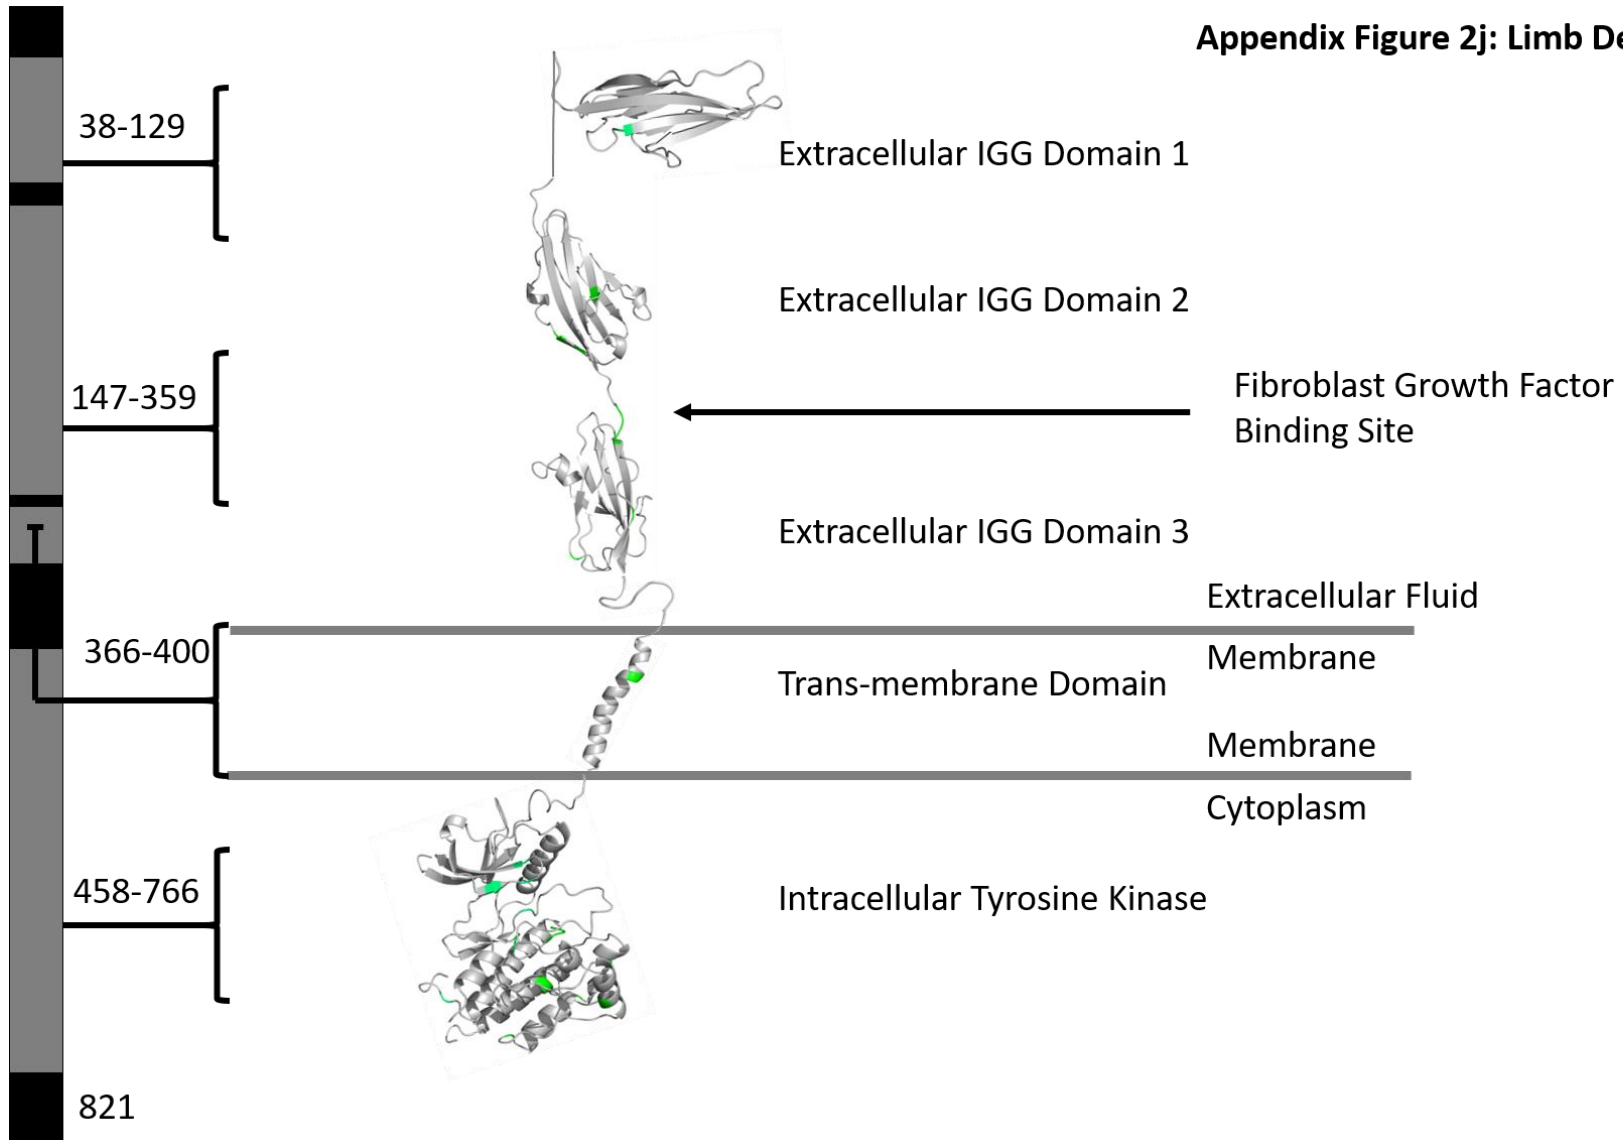

Appendix Figure 2k: Craniosynostosis

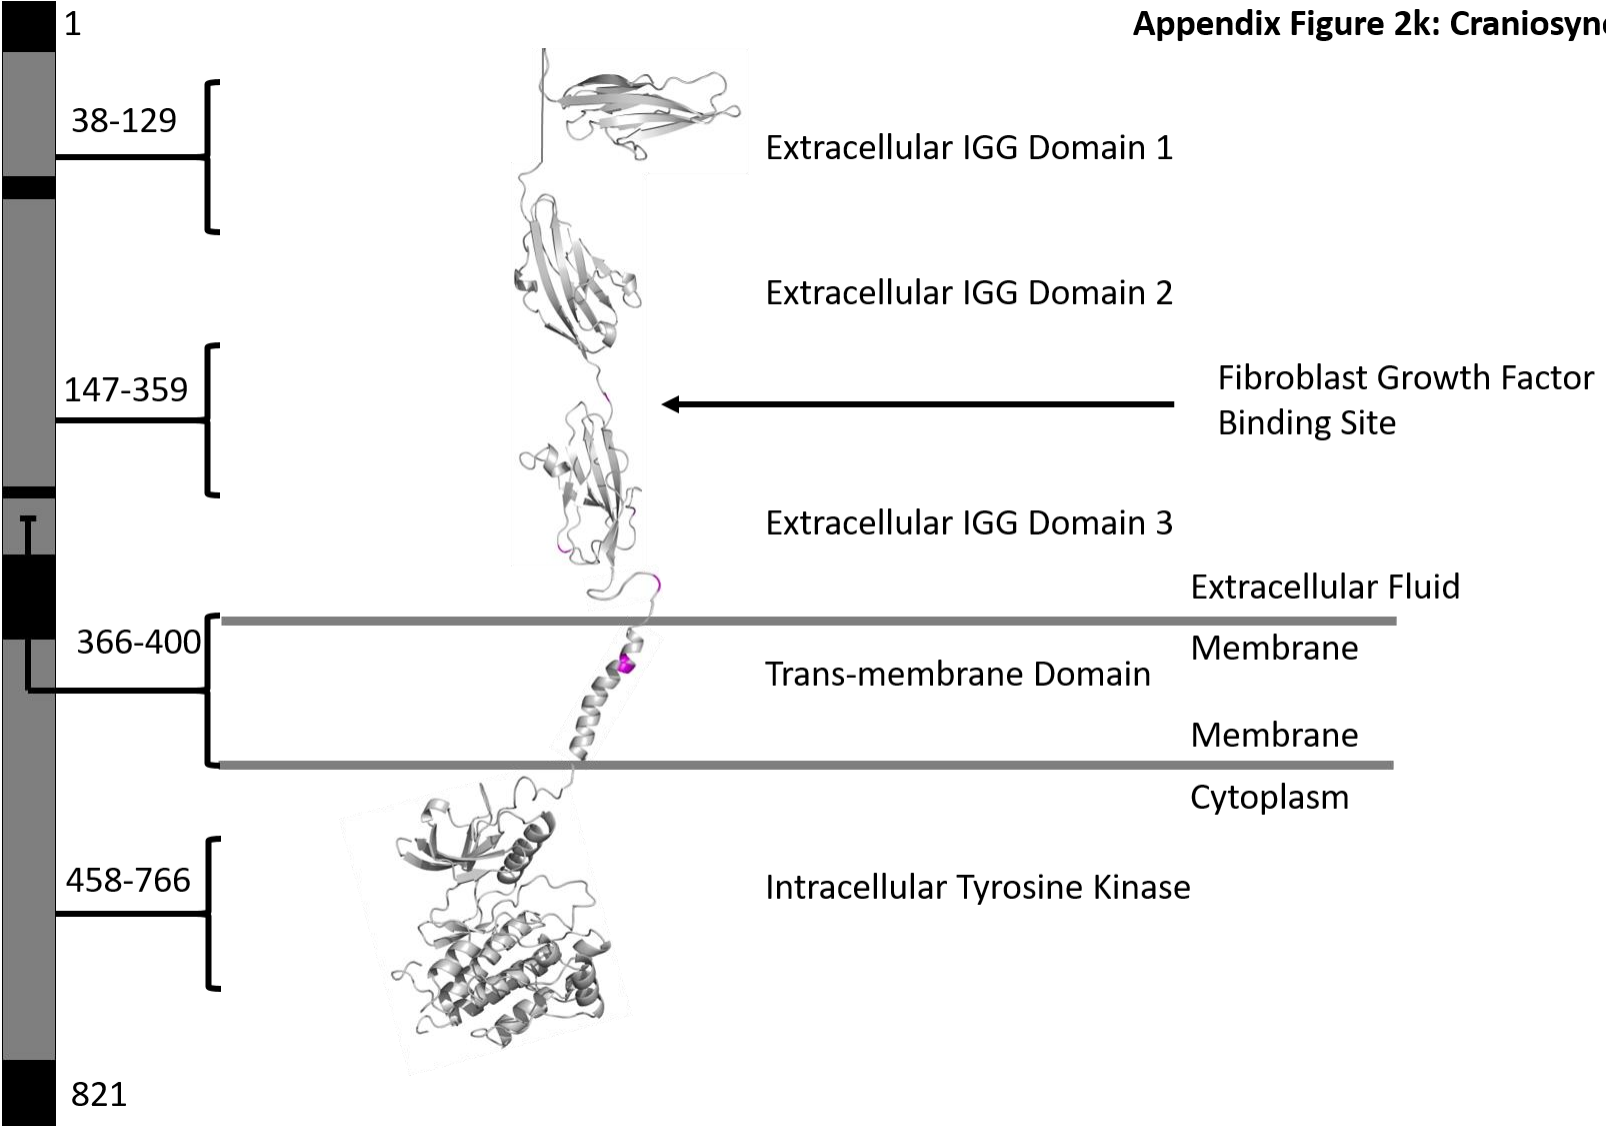

# Appendix Figure 2I: Intellectual Disability/Developmental Delay

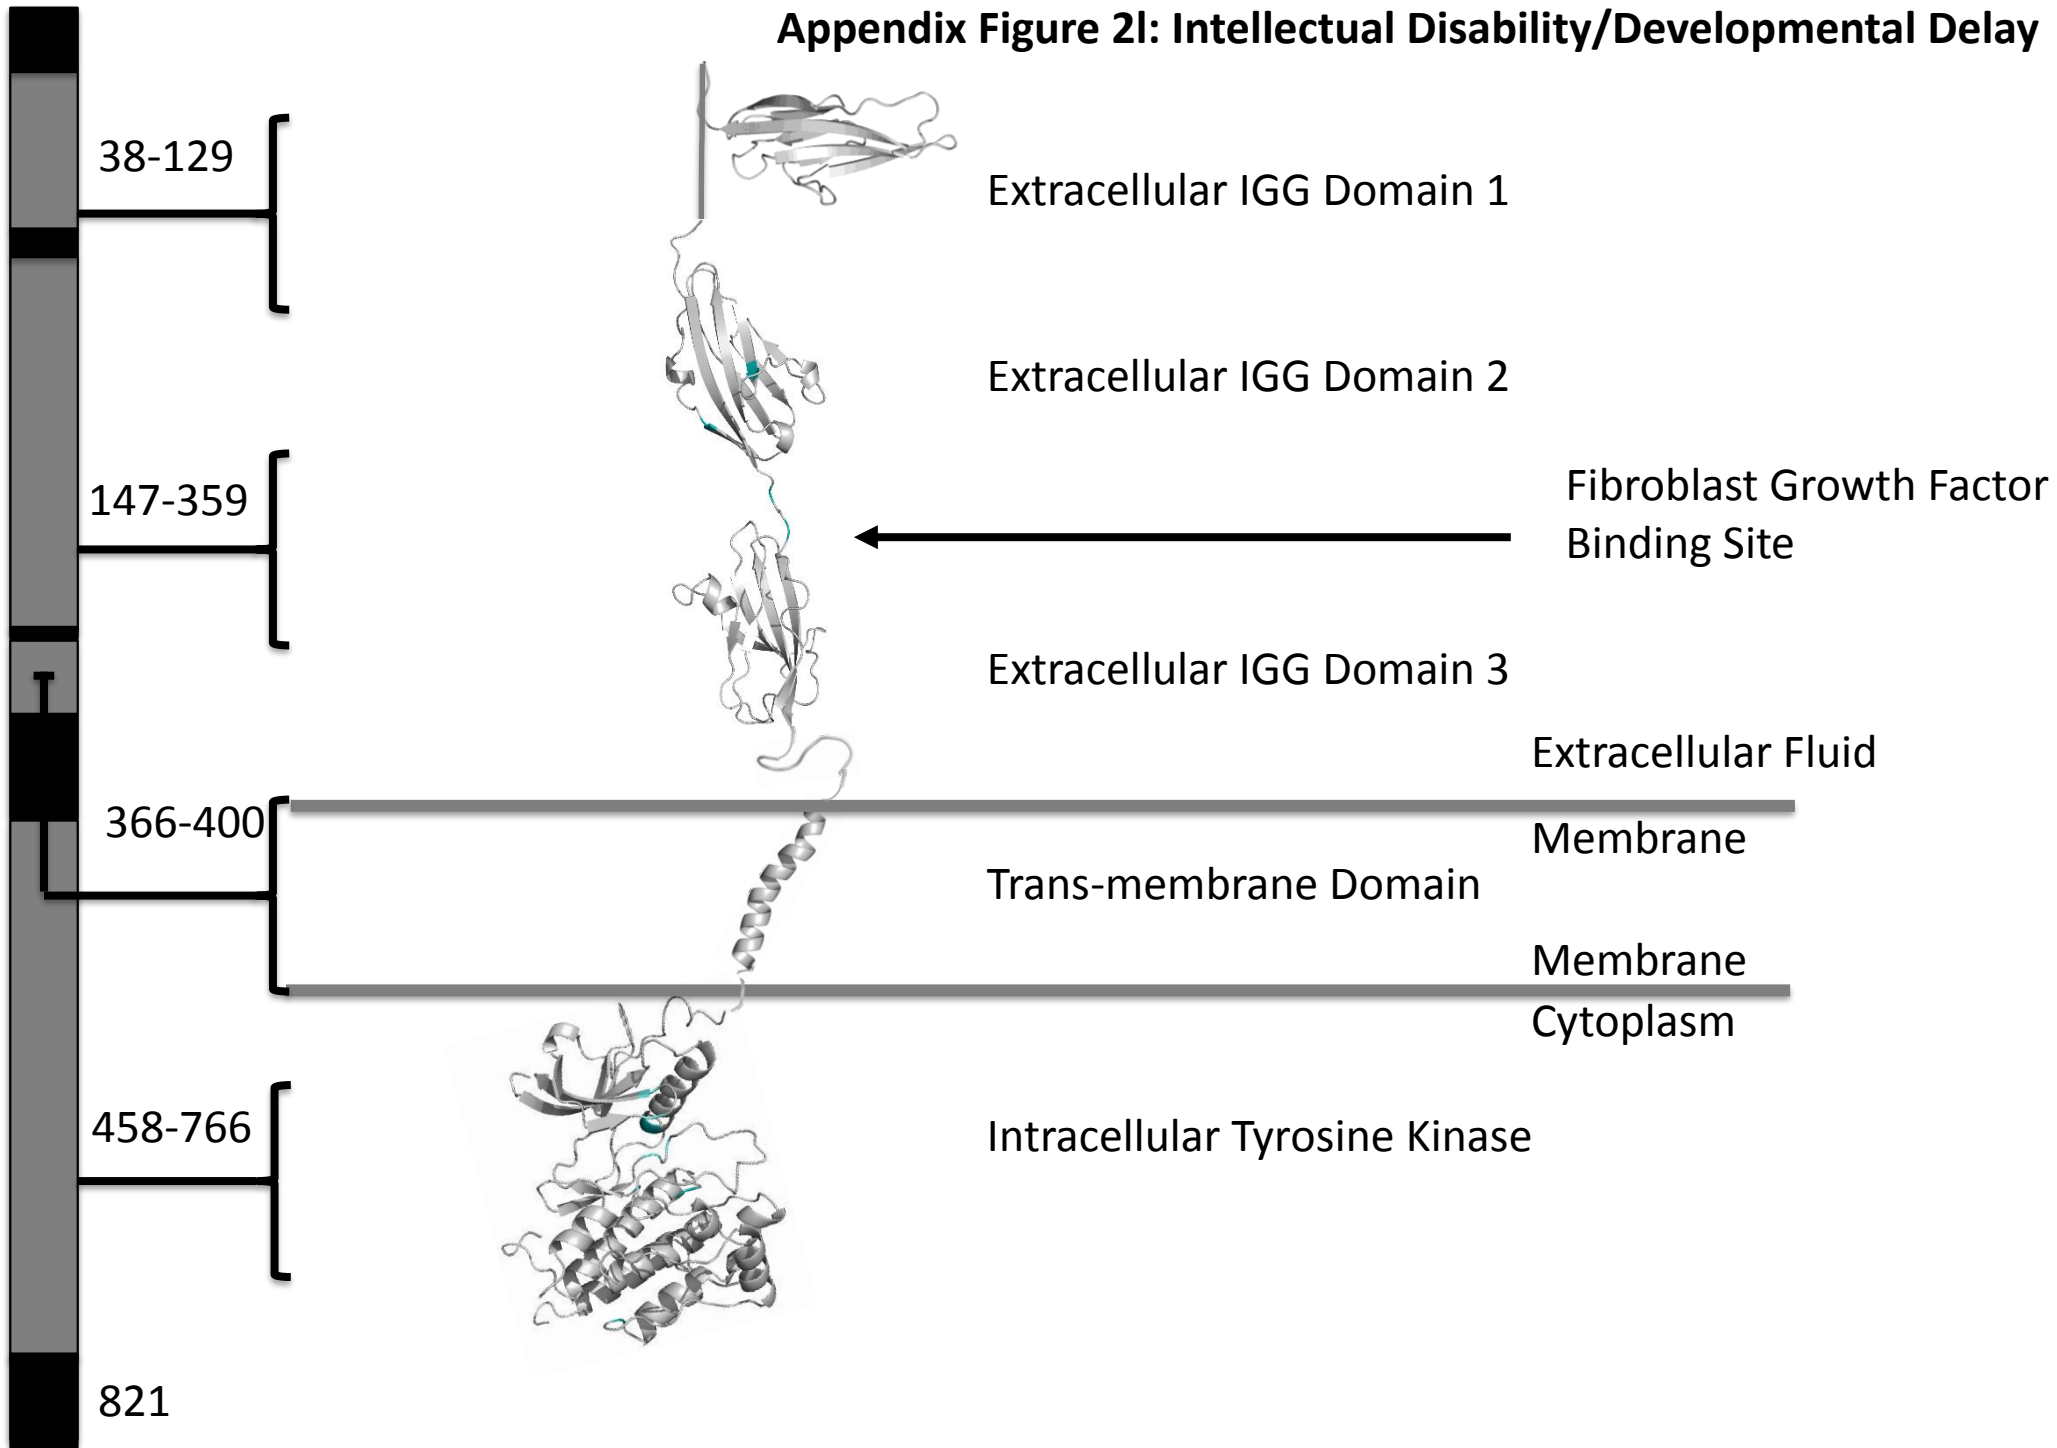

**Appendix Figure 2m: Corpus Callosum Agenesis**

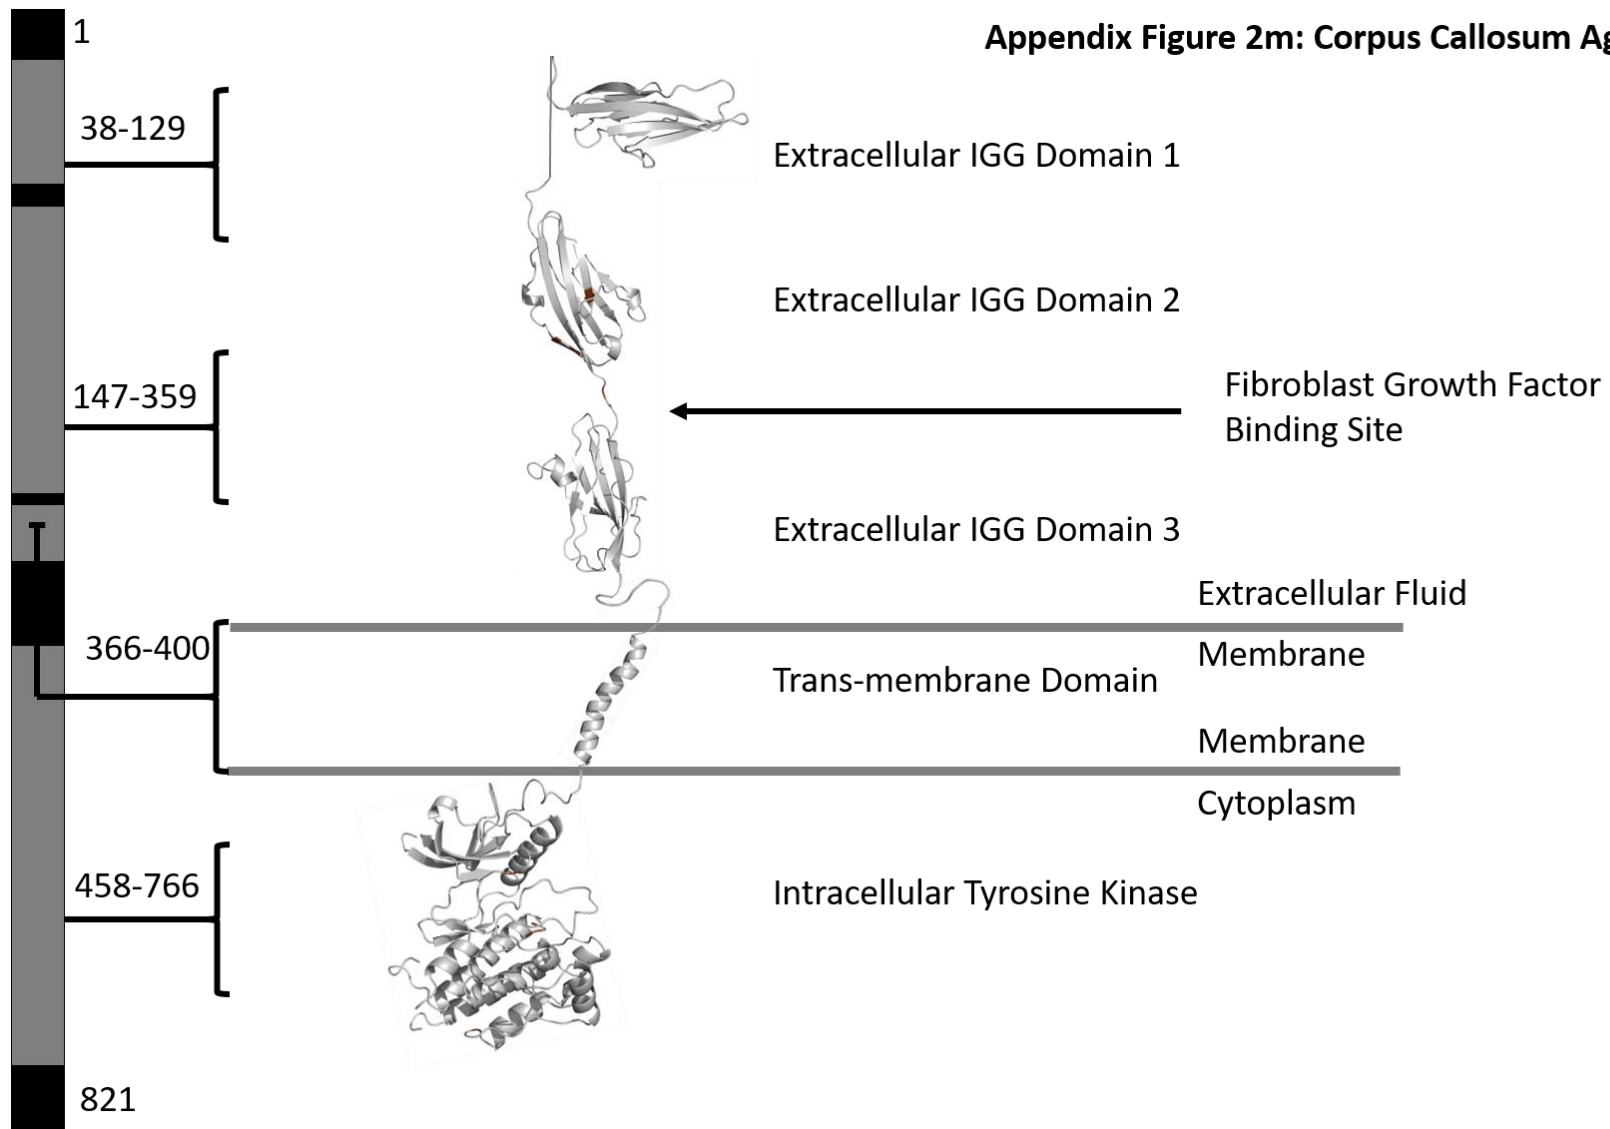

Appendix Figure 2n: Holoprosencephaly

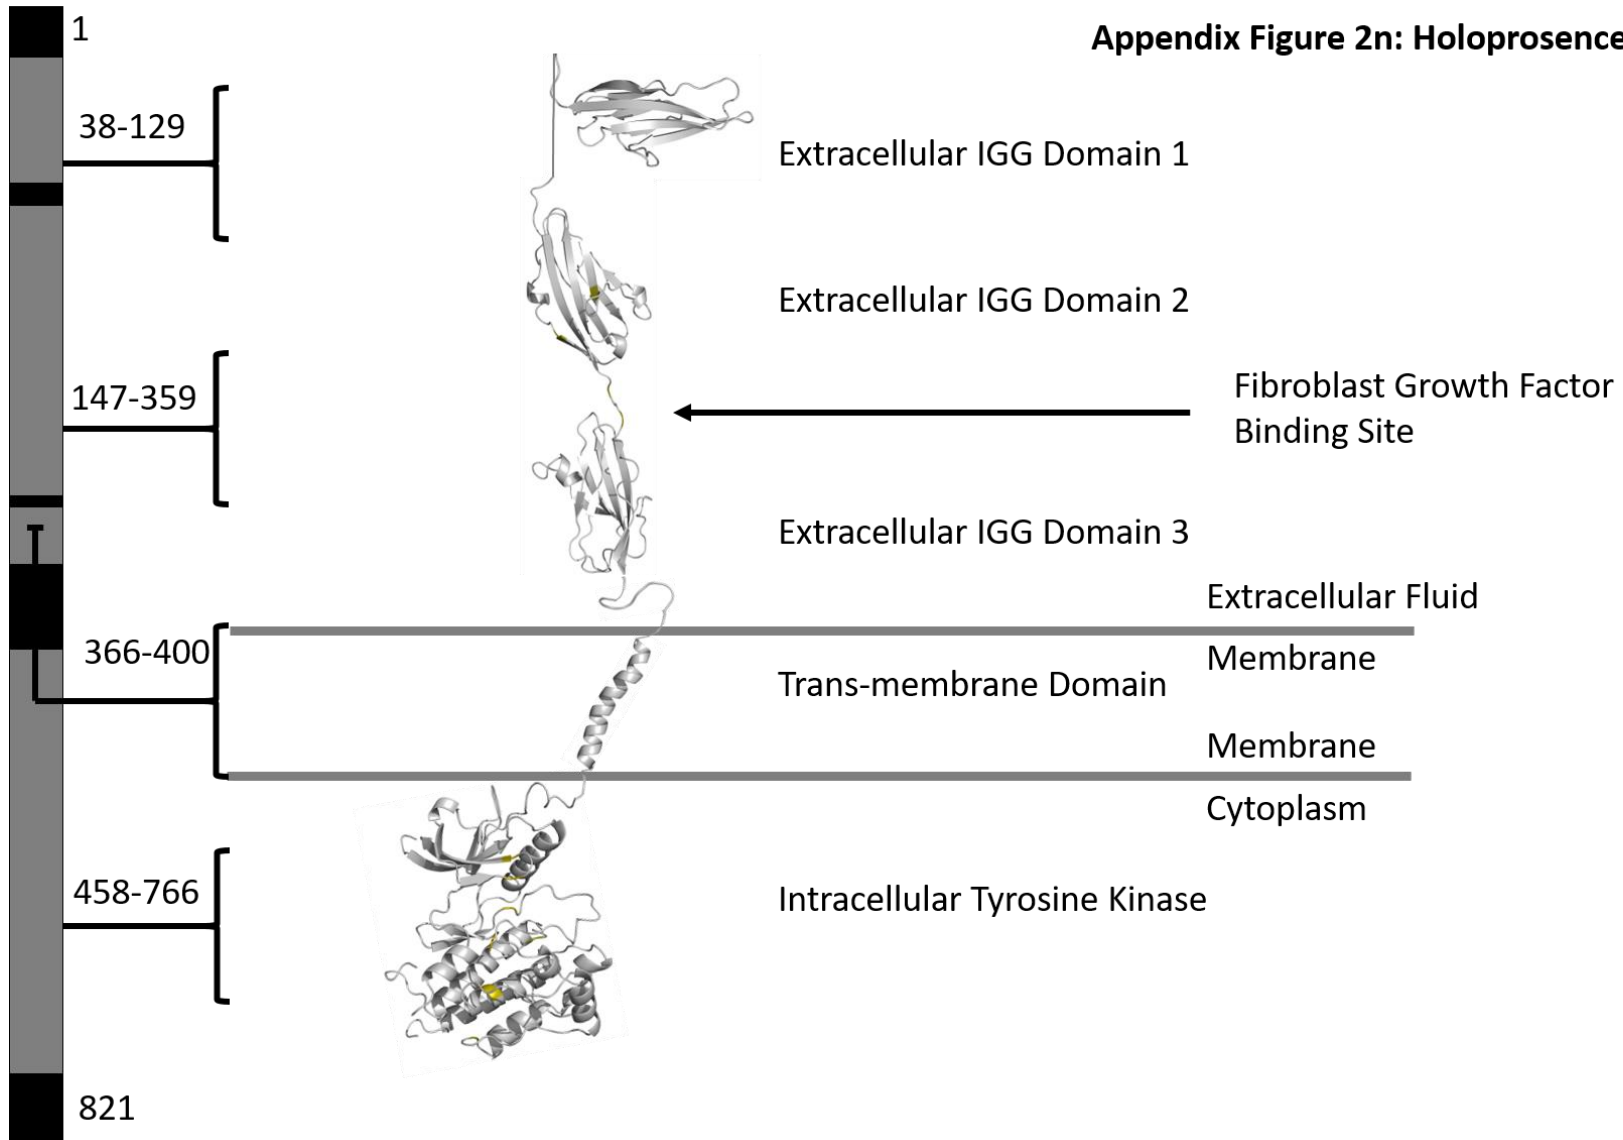

Appendix Figure 2o: Craniofacial Defects

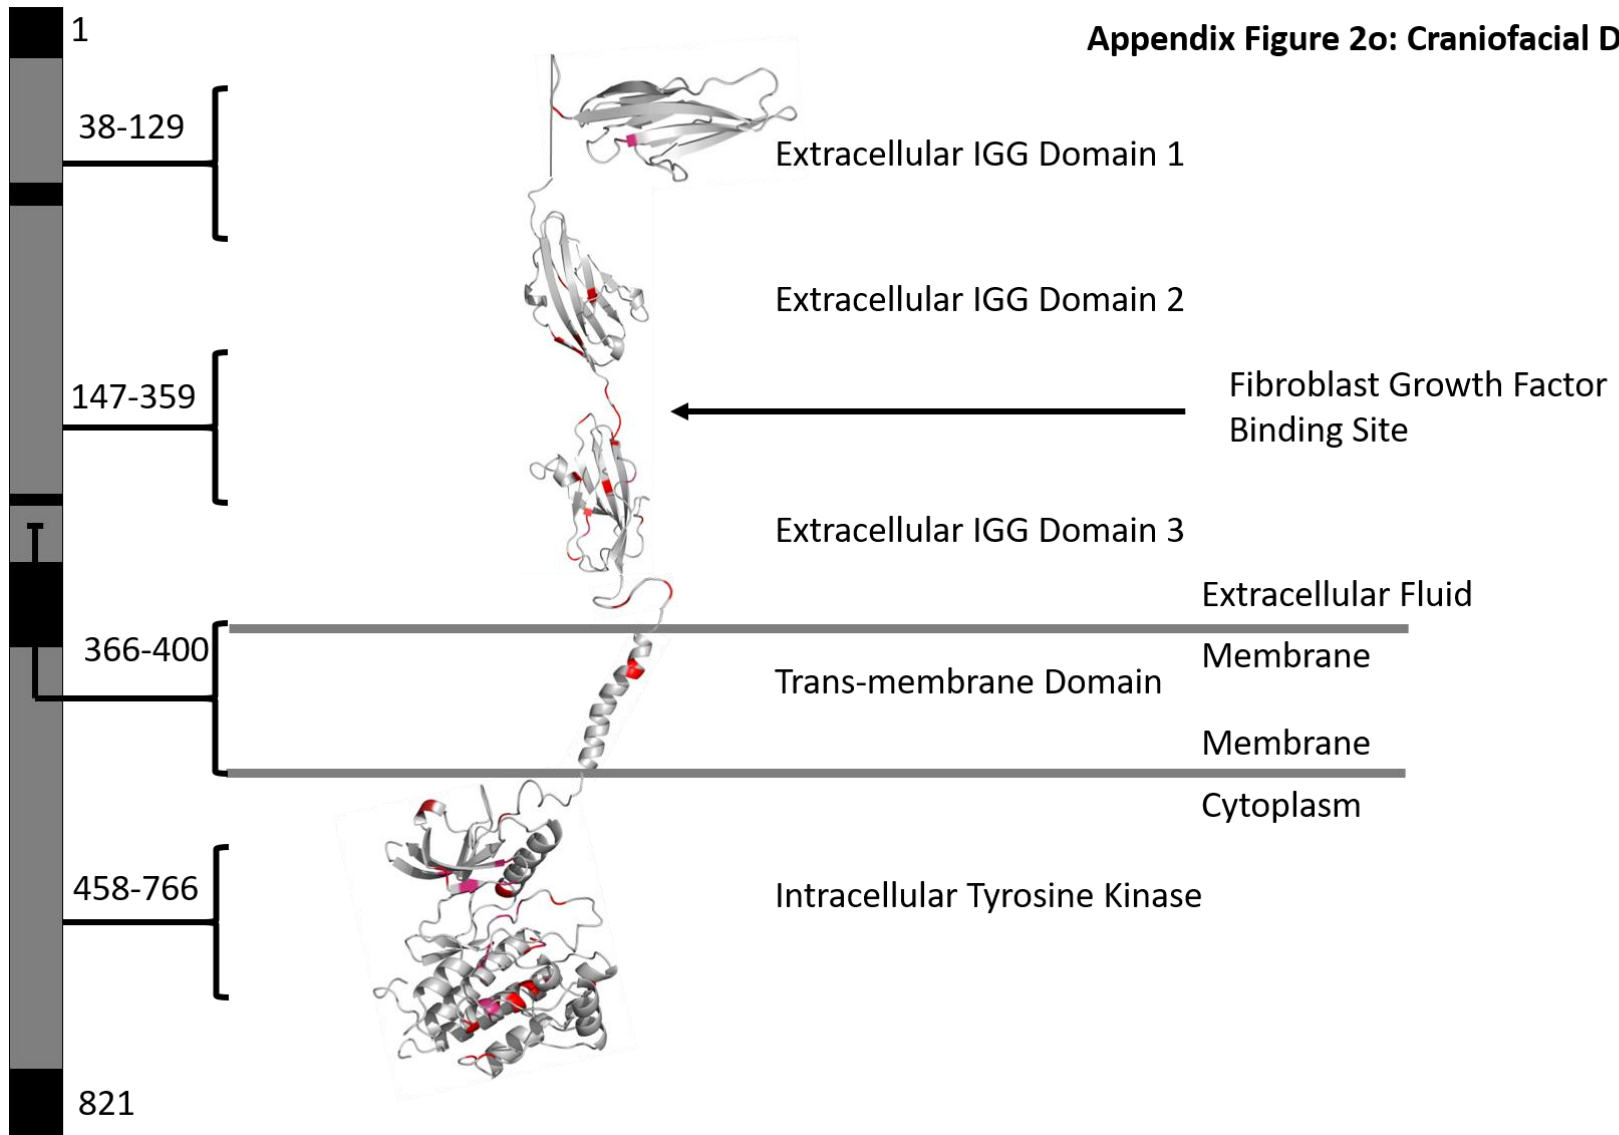

**Appendix Figure 2p: Craniofacial Defects and Limb Defects**

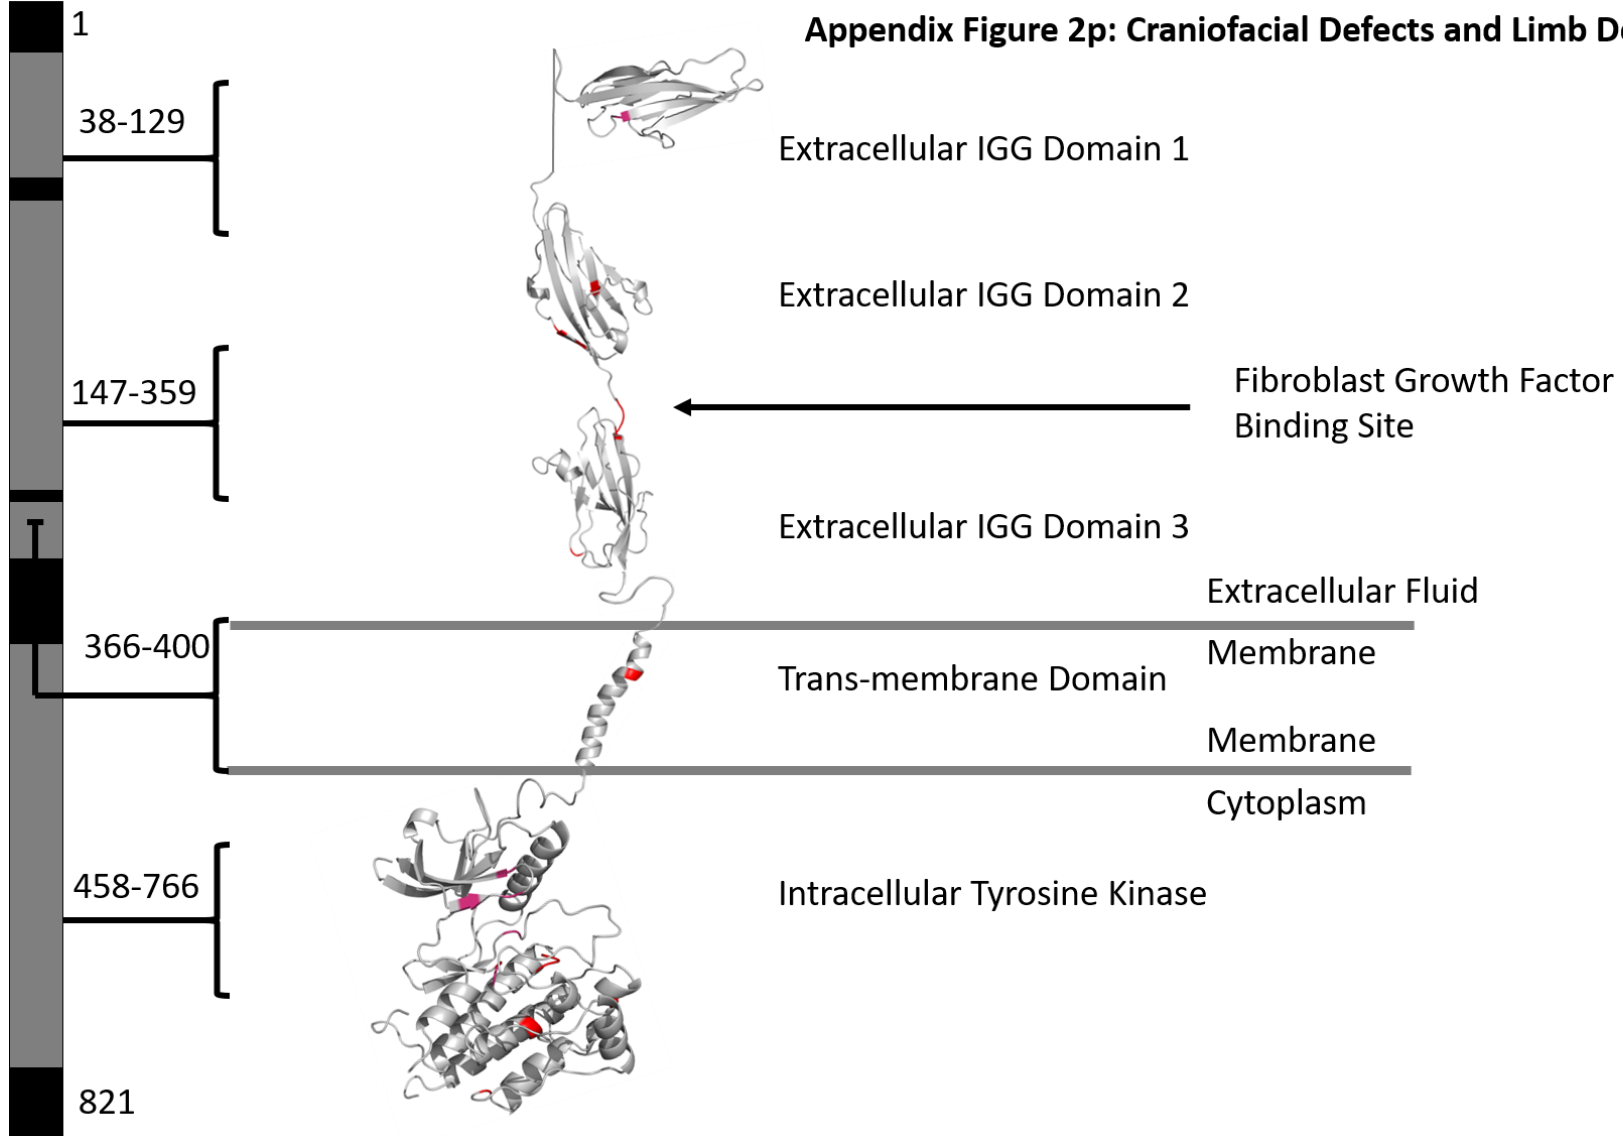



### **Appendix Figure 2a-p:** Maps of *FGFR1* variants by clinical disease and phenotype

Variants of *FGFR1* reported in PubMed were recorded with published clinical phenotypes. A map of *FGFR1* was generated for each disease and phenotype with the corresponding variants color coded by CADD phred score (more vibrant – more deleterious; less vibrant – less deleterious). Maps were generated for (a) Hartsfield syndrome, (b) Pfeiffer syndrome/osteoglophonic dysplasia, (c) encephalocraniocutaneous lipomatosis, (d) septo-optic dysplasia, (e) normosomic congenital hypogonadotropic hypogonadism/Kallmann syndrome, (f) dental agenesis, (g) cleft lip and/or palate, (h) malformed ears, (i) hearing loss, (j) limb defects (ectrodactyly, syndactyly polydactyly, oligodactyly or clinodactyly), (k) craniosynostosis, (l) intellectual disability/developmental delay, (m) corpus callosum agenesis, (n) holoprosencephaly, (o) craniofacial defects (dental agenesis, cleft lip and/or palate, malformed ears, and/or craniosynostosis), (p) craniofacial defects + limb defects (any variants modeled in o which are also associated with limb defects).

### **Protein Model Building and Testing**

Model information for isoform 1 of *FGFR1* (ENST00000447712) was obtained using the Protein Data Bank (Berman, Westbrook et al. 2000) and Uniprot (UniProt 2015). Force Field X (Fenn and Schnieders 2011) was used to refine the structure using the polarizable AMOEBA force field (Shi, Xia et al. 2013). The refinement used a three-step procedure consisting of a local energy minimization, side-chain rotamer optimization using dead-end elimination (LuCore, Litman et al. 2015), and a final local energy minimization. Remaining unfavorable side-chain conformations were identified using MolProbity (Chen, Arendall et al. 2010), prompting further rounds of local minimization and rotamer optimization until no further improvements could be made.

Since the mutated amino acid residue is located within the tyrosine kinase (TK) domain, the Visual Molecular Dynamics (VMD (Humphrey, Dalke et al. 1996)) software was used to mimic a cellular environment and create the TK structure and topology files for simulation in the molecular dynamics program NAMD (Phillips, Braun et al. 2005). A tri-peptide surrogate for the unfolded state was created using Glycine residue 487 and its two surrounding residues (Glutamate and Cysteine)—a common approximation based on the premise that the unfolded state is largely unstructured. The NAMD software was used to compute thermodynamic stability changes using the CHARMM 27 force field (MacKerell, Banavali et al. 2000). The systems were equilibrated using local minimization followed by a 50 psec molecular dynamics simulation at 300 Kelvin. Production of alchemical-free energy simulations for the folded and unfolded states sampled an alchemical thermodynamic pathway between wildtype and variant end states (“alchemical” is the accepted term for a mathematically rigorous, but unphysical pathway between chemical states). The alchemical path was divided into ten windows, where each window defined an intermediate thermodynamic state along the pathway. Each window was sampled using molecular dynamics for 5 nsec based on a time step of 1 fsec and the NPT ensemble (constant number of particles, constant pressure of 1 atm and constant temperature of 300 K). The relative change in protein folding stability was then calculated as  $\Delta\Delta G = \Delta G_{\text{Folded}} - \Delta G_{\text{Unfolded}}$ .

## References

- Abel, B. S., N. D. Shaw, J. M. Brown, J. M. Adams, T. Alati, K. A. Martin, N. Pitteloud, S. B. Seminara, L. Plummer, D. Pignatelli, W. F. Crowley, Jr., C. K. Welt and J. E. Hall (2013). "Responsiveness to a physiological regimen of GnRH therapy and relation to genotype in women with isolated hypogonadotropic hypogonadism." J Clin Endocrinol Metab **98**(2): E206-216.
- Akkus, G., L. D. Kotan, E. Durmaz, E. Mengen, I. Turan, A. Ulubay, F. Gurbuz, B. Yuksel, T. Tetiker and A. K. Topaloglu (2017). "Hypogonadotropic Hypogonadism due to Novel FGFR1 Mutations." J Clin Res Pediatr Endocrinol **9**(2): 95-100.
- Albuisson, J., C. Pecheux, J. C. Carel, D. Lacombe, B. Leheup, P. Lapuzina, P. Bouchard, E. Legius, G. Matthijs, M. Wasniewska, M. Delpech, J. Young, J. P. Hardelin and C. Dode (2005). "Kallmann syndrome: 14 novel mutations in KAL1 and FGFR1 (KAL2)." Hum Mutat **25**(1): 98-99.
- Ayers, K. L., A. Bouty, G. Robevska, J. A. van den Bergen, A. Z. Juniarto, N. A. Listyasari, A. H. Sinclair and S. M. Faradz (2017). "Variants in congenital hypogonadotropic hypogonadism genes identified in an Indonesian cohort of 46,XY under-virilised boys." Hum Genomics **11**(1): 1.
- Bailleul-Forestier, I., C. Gros, D. Zenaty, S. Bennaceur, J. Leger and N. de Roux (2010). "Dental agenesis in Kallmann syndrome individuals with FGFR1 mutations." Int J Paediatr Dent **20**(4): 305-312.
- Barik, M., M. Bajpai, A. Malhotra, J. C. Samantaray, S. Dwivedi and S. Das (2015). "Novel mutation detection of fibroblast growth factor receptor 1 (FGFR1) gene, FGFR2IIIa, FGFR2IIIb, FGFR2IIIc, FGFR3, FGFR4 gene for craniosynostosis: A prospective study in Asian Indian patient." J Pediatr Neurosci **10**(3): 207-213.

- Bellus, G. A., K. Gaudenz, E. H. Zackai, L. A. Clarke, J. Szabo, C. A. Francomano and M. Muenke (1996). "Identical mutations in three different fibroblast growth factor receptor genes in autosomal dominant craniosynostosis syndromes." Nat Genet **14**(2): 174-176.
- Bennett, J. T., T. Y. Tan, D. Alcantara, M. Tetrault, A. E. Timms, D. Jensen, S. Collins, M. J. Nowaczyk, M. J. Lindhurst, K. M. Christensen, S. R. Braddock, H. Brandling-Bennett, R. C. Hennekam, B. Chung, A. Lehman, J. Su, S. Ng, D. J. Amor, G. University of Washington Center for Mendelian, C. Care4Rare Canada, J. Majewski, L. G. Biesecker, K. M. Boycott, W. B. Dobyns, M. O'Driscoll, U. Moog and L. M. McDonell (2016). "Mosaic Activating Mutations in FGFR1 Cause Encephalocraniocutaneous Lipomatosis." Am J Hum Genet **98**(3): 579-587.
- Berman, H. M., J. Westbrook, Z. Feng, G. Gilliland, T. N. Bhat, H. Weissig, I. N. Shindyalov and P. E. Bourne (2000). "The Protein Data Bank." Nucleic Acids Res **28**(1): 235-242.
- Bessenyeyi, B., A. Nagy, K. Szakszon, A. Mokanszki, E. Balogh, A. Ujfalusi, M. Tihanyi, L. Novak, L. Bognar and E. Olah (2015). "Clinical and genetic characteristics of craniosynostosis in Hungary." Am J Med Genet A **167A**(12): 2985-2991.
- Bessenyeyi, B., M. Tihanyi, M. Hartwig, K. Szakszon and E. Olah (2014). "Variable expressivity of pfeiffer syndrome in a family with FGFR1 p.Pro252Arg mutation." Am J Med Genet A **164A**(12): 3176-3179.
- Caronia, L. M., C. Martin, C. K. Welt, G. P. Sykiotis, R. Quinton, A. Thambundit, M. Avbelj, S. Dhruvakumar, L. Plummer, V. A. Hughes, S. B. Seminara, P. A. Boepple, Y. Sidis, W. F. Crowley, Jr., K. A. Martin, J. E. Hall and N. Pitteloud (2011). "A genetic basis for functional hypothalamic amenorrhea." N Engl J Med **364**(3): 215-225.

- Cerrato, F. E., L. C. Nuzzi, T. A. Theman, A. Taghinia, J. Upton and B. I. Labow (2014). "Upper extremity anomalies in Pfeiffer syndrome and mutational correlations." Plast Reconstr Surg **133**(5): 654e-661e.
- Chen, V. B., W. B. Arendall, 3rd, J. J. Headd, D. A. Keedy, R. M. Immormino, G. J. Kapral, L. W. Murray, J. S. Richardson and D. C. Richardson (2010). "MolProbity: all-atom structure validation for macromolecular crystallography." Acta Crystallogr D Biol Crystallogr **66**(Pt 1): 12-21.
- Choi, J. H., R. Balasubramanian, P. H. Lee, N. D. Shaw, J. E. Hall, L. Plummer, C. L. Buck, M. L. Kottler, K. Jarzabek, S. Wolczynski, R. Quinton, A. C. Latronico, C. Dode, T. Ogata, H. G. Kim, L. C. Layman, J. F. Gusella and W. F. Crowley, Jr. (2015). "Expanding the Spectrum of Founder Mutations Causing Isolated Gonadotropin-Releasing Hormone Deficiency." J Clin Endocrinol Metab **100**(10): E1378-1385.
- Chokdeemboon, C., C. Mahatumarat, N. Rojvachiranonda, S. Tongkobetch, K. Suphapeetiporn and V. Shotelersuk (2013). "FGFR1 and FGFR2 mutations in Pfeiffer syndrome." J Craniofac Surg **24**(1): 150-152.
- Correa, F. A., E. B. Trarbach, C. Tusset, A. C. Latronico, L. R. Montenegro, L. R. Carvalho, M. M. Franca, A. P. Otto, E. F. Costalonga, V. N. Brito, A. P. Abreu, M. Y. Nishi, A. A. Jorge, I. J. Arnhold, Y. Sidis, N. Pitteloud and B. B. Mendonca (2015). "FGFR1 and PROKR2 rare variants found in patients with combined pituitary hormone deficiencies." Endocr Connect **4**(2): 100-107.
- Costa-Barbosa, F. A., R. Balasubramanian, K. W. Keefe, N. D. Shaw, N. Al-Tassan, L. Plummer, A. A. Dwyer, C. L. Buck, J. H. Choi, S. B. Seminara, R. Quinton, D. Monies, B. Meyer, J. E. Hall, N. Pitteloud and W. F. Crowley, Jr. (2013). "Prioritizing genetic testing in patients with Kallmann syndrome using clinical phenotypes." J Clin Endocrinol Metab **98**(5): E943-953.

- Dallago, C. M., D. D. Abech, J. F. Pereira-Lima, C. G. Leaes, R. L. Batista, E. B. Trarbach and C. Oliveira Mda (2008). "Two cases of Kallmann syndrome associated with empty sella." Pituitary **11**(1): 109-112.
- Dhamija, R., S. Kirmani, X. Wang, M. J. Ferber, E. D. Wieben, K. N. Lazaridis and D. Babovic-Vuksanovic (2014). "Novel de novo heterozygous FGFR1 mutation in two siblings with Hartsfield syndrome: a case of gonadal mosaicism." Am J Med Genet A **164A**(9): 2356-2359.
- Dode, C., C. Fouveaut, G. Mortier, S. Janssens, J. Bertherat, J. Mahoudeau, M. L. Kottler, C. Chabrolle, A. Gancel, I. Francois, K. Devriendt, S. Wolczynski, M. Pugeat, A. Pineiro-Garcia, A. Murat, P. Bouchard, J. Young, M. Delpech and J. P. Hardelin (2007). "Novel FGFR1 sequence variants in Kallmann syndrome, and genetic evidence that the FGFR1c isoform is required in olfactory bulb and palate morphogenesis." Hum Mutat **28**(1): 97-98.
- Dode, C., J. Levilliers, J. M. Dupont, A. De Paepe, N. Le Du, N. Soussi-Yanicostas, R. S. Coimbra, S. Delmaghani, S. Compain-Nouaille, F. Baverel, C. Pecheux, D. Le Tessier, C. Cruaud, M. Delpech, F. Speleman, S. Vermeulen, A. Amalfitano, Y. Bachelot, P. Bouchard, S. Cabrol, J. C. Carel, H. Delemarre-van de Waal, B. Goulet-Salmon, M. L. Kottler, O. Richard, F. Sanchez-Franco, R. Saura, J. Young, C. Petit and J. P. Hardelin (2003). "Loss-of-function mutations in FGFR1 cause autosomal dominant Kallmann syndrome." Nat Genet **33**(4): 463-465.
- Dubourg, C., W. Carre, H. Hamdi-Roze, C. Mouden, J. Roume, B. Abdelmajid, D. Amram, C. Baumann, N. Chassaing, C. Coubes, L. Faivre-Olivier, E. Ginglinger, M. Gonzales, A. Levy-Mozziconacci, S. A. Lynch, S. Naudion, L. Pasquier, A. Poidvin, F. Prieur, P. Sarda, A. Toutain, V. Dupe, L. Akloul, S. Odent, M. de Tayrac and V. David (2016). "Mutational Spectrum in Holoprosencephaly Shows That FGF is a New Major Signaling Pathway." Hum Mutat **37**(12): 1329-1339.

- Entrala-Bernal, C., C. Montes-Castillo, M. J. Alvarez-Cubero, C. Gutierrez-Alcantara, F. Fernandez-Rosado, E. Martinez-Espiotan, C. Sanchez-Malo and P. Santiago-Fernandez (2014). "Genetic diagnosis of idiopathic hypogonadotrophic hypogonadism: a new point mutation in the KAL2 gene." Hormones (Athens) **13**(2): 280-285.
- Falardeau, J., W. C. Chung, A. Beenken, T. Raivio, L. Plummer, Y. Sidis, E. E. Jacobson-Dickman, A. V. Eliseenkova, J. Ma, A. Dwyer, R. Quinton, S. Na, J. E. Hall, C. Huot, N. Alois, S. H. Pearce, L. W. Cole, V. Hughes, M. Mohammadi, P. Tsai and N. Pitteloud (2008). "Decreased FGF8 signaling causes deficiency of gonadotropin-releasing hormone in humans and mice." J Clin Invest **118**(8): 2822-2831.
- Farrow, E. G., S. I. Davis, S. D. Mooney, P. Beighton, L. Mascarenhas, Y. R. Gutierrez, P. Pitukcheewanont and K. E. White (2006). "Extended mutational analyses of FGFR1 in osteoglophonic dysplasia." Am J Med Genet A **140**(5): 537-539.
- Fenn, T. D. and M. J. Schnieders (2011). "Polarizable atomic multipole X-ray refinement: Weighting schemes for macromolecular diffraction." Acta Crystallographica Section D **67**(11): 957-965.
- Fukami, M., M. Iso, N. Sato, M. Igarashi, M. Seo, I. Kazukawa, E. Kinoshita, S. Dateki and T. Ogata (2013). "Submicroscopic deletion involving the fibroblast growth factor receptor 1 gene in a patient with combined pituitary hormone deficiency." Endocr J **60**(8): 1013-1020.
- Gaudenz, K., E. Roessler, S. Vainikka, K. Alitalo and M. Muenke (1998). "Analysis of patients with craniosynostosis syndromes for a pro246Arg mutation of FGFR4." Mol Genet Metab **64**(1): 76-79.

- Goncalves, C., M. Bastos, D. Pignatelli, T. Borges, J. M. Aragues, F. Fonseca, B. D. Pereira, S. Socorro and M. C. Lemos (2015). "Novel FGFR1 mutations in Kallmann syndrome and normosmic idiopathic hypogonadotropic hypogonadism: evidence for the involvement of an alternatively spliced isoform." Fertil Steril **104**(5): 1261-1267 e1261.
- Gu, C., J. Li, L. Zhu, Z. Lu and H. Huang (2016). "Analysis of catechol-O-methyltransferase gene mutation and identification of new pathogenic gene for paroxysmal kinesigenic dyskinesia." Neurol Sci **37**(3): 377-383.
- Hackett, A. and L. Rowe (2006). "FGFR1 Pfeiffer syndrome without craniosynostosis: an additional case report." Clin Dysmorphol **15**(4): 207-210.
- Hero, M., E. M. Laitinen, T. Varimo, K. Vaaralahti, J. Tommiska and T. Raivio (2015). "Childhood growth of females with Kallmann syndrome and FGFR1 mutations." Clin Endocrinol (Oxf) **82**(1): 122-126.
- Hong, S., P. Hu, J. Marino, S. B. Hufnagel, R. J. Hopkin, A. Toromanovic, A. Richieri-Costa, L. A. Ribeiro-Bicudo, P. Kruszka, E. Roessler and M. Muenke (2016). "Dominant-negative kinase domain mutations in FGFR1 can explain the clinical severity of Hartsfield syndrome." Hum Mol Genet **25**(10): 1912-1922.
- Humphrey, W., A. Dalke and K. Schulten (1996). "VMD: visual molecular dynamics." J Mol Graph **14**(1): 33-38, 27-38.
- Izumi, Y., E. Suzuki, S. Kanzaki, S. Yatsuga, S. Kinjo, M. Igarashi, T. Maruyama, S. Sano, R. Horikawa, N. Sato, K. Nakabayashi, K. Hata, A. Umezawa, T. Ogata, Y. Yoshimura and M. Fukami (2014). "Genome-wide copy number analysis and systematic mutation screening in 58 patients with hypogonadotropic hypogonadism." Fertil Steril **102**(4): 1130-1136 e1133.
- Jarzabek, K., S. Wolczynski, R. Lesniewicz, G. Plessis and M. L. Kottler (2012). "Evidence that FGFR1 loss-of-function mutations may cause variable skeletal malformations in patients with Kallmann syndrome." Adv Med Sci **57**(2): 314-321.



Keaton, A. A., B. D. Solomon, A. J. van Essen, K. M. Pflieger, M. A. Slama, J. A. Martin and M. Muenke (2010).

"Holoprosencephaly and ectrodactyly: Report of three new patients and review of the literature." Am J Med Genet C Semin Med Genet **154C**(1): 170-175.

Koika, V., P. Varnavas, H. Valavani, Y. Sidis, L. Plummer, A. Dwyer, R. Quinton, C. Kanaka-Gantenbein, N. Pitteloud, A. Sertedaki, C. Dacou-Voutetakis and N. A. Georgopoulos (2013). "Comparative functional analysis of two fibroblast growth factor receptor 1 (FGFR1) mutations affecting the same residue (R254W and R254Q) in isolated hypogonadotropic hypogonadism (IHH)." Gene **516**(1): 146-151.

Laitinen, E. M., J. Tommiska, L. Dunkel, U. Sankilampi, K. Vaaralahti and T. Raivio (2010). "Idiopathic hypogonadotropic hypogonadism in a mother and her monozygotic twins born after a single embryo transfer." Fertil Steril **93**(6): 2074 e2013-2076.

Laitinen, E. M., K. Vaaralahti, J. Tommiska, E. Eklund, M. Tervaniemi, L. Valanne and T. Raivio (2011). "Incidence, phenotypic features and molecular genetics of Kallmann syndrome in Finland." Orphanet J Rare Dis **6**: 41.

Lajeunie, E., S. Heuertz, V. El Ghouzzi, J. Martinovic, D. Renier, M. Le Merrer and J. Bonaventure (2006). "Mutation screening in patients with syndromic craniosynostoses indicates that a limited number of recurrent FGFR2 mutations accounts for severe forms of Pfeiffer syndrome." Eur J Hum Genet **14**(3): 289-298.

LuCore, S. D., J. M. Litman, K. T. Powers, S. Gao, A. M. Lynn, W. T. Tollefson, T. D. Fenn, M. T. Washington and M. J. Schnieders (2015). "Dead-End Elimination with a Polarizable Force Field Repacks PCNA Structures." Biophys J **109**(4): 816-826.

- Luo, H., R. Zheng, Y. Zhao, J. Wu, J. Li, F. Jiang, D. N. Chen, X. T. Zhou and J. D. Li (2017). "A dominant negative FGFR1 mutation identified in a Kallmann syndrome patient." Gene **621**: 1-4.
- MackKerell, A. D., Jr., N. Banavali and N. Folooppe (2000). "Development and current status of the CHARMM force field for nucleic acids." Biopolymers **56**(4): 257-265.
- Marcos, S., J. Sarfati, C. Leroy, C. Fouveaut, P. Parent, C. Metz, S. Wolczynski, M. Gerard, E. Bieth, F. Kurtz, O. Verier-Mine, L. Perrin, F. Archambeaud, S. Cabrol, P. Rodien, H. Hove, T. Prescott, D. Lacombe, S. Christin-Maitre, P. Touraine, S. Hieronimus, D. Dewailly, J. Young, M. Pugeat, J. P. Hardelin and C. Dode (2014). "The prevalence of CHD7 missense versus truncating mutations is higher in patients with Kallmann syndrome than in typical CHARGE patients." J Clin Endocrinol Metab **99**(10): E2138-2143.
- Meyers, G. A., S. J. Orlow, I. R. Munro, K. A. Przylepa and E. W. Jabs (1995). "Fibroblast growth factor receptor 3 (FGFR3) transmembrane mutation in Crouzon syndrome with acanthosis nigricans." Nat Genet **11**(4): 462-464.
- Miura, K., S. Miura, K. Yoshiura, S. Seminara, D. Hamaguchi, N. Niikawa and H. Masuzaki (2010). "A case of Kallmann syndrome carrying a missense mutation in alternatively spliced exon 8A encoding the immunoglobulin-like domain IIIb of fibroblast growth factor receptor 1." Hum Reprod **25**(4): 1076-1080.
- Muenke, M., U. Schell, A. Hehr, N. H. Robin, H. W. Losken, A. Schinzel, L. J. Pulleyn, P. Rutland, W. Reardon, S. Malcolm and et al. (1994). "A common mutation in the fibroblast growth factor receptor 1 gene in Pfeiffer syndrome." Nat Genet **8**(3): 269-274.

- Nair, S., S. Jadhav, A. Lila, V. Jagtap, A. Bukan, R. Pandit, A. Ekbote, M. Dharmalingam, P. Kumar, P. Kalra, P. Gandhi, R. Walia, S. Sankhe, V. Raghavan, V. Shivane, P. Menon, T. Bandgar and N. Shah (2016). "Spectrum of phenotype and genotype of congenital isolated hypogonadotropic hypogonadism in Asian Indians." Clin Endocrinol (Oxf) **85**(1): 100-109.
- Nieuwenhuyzen-De Boer, G. M., A. J. Hoogeboom, L. S. Smit, R. Heydanus and A. J. Eggink (2014). "Pfeiffer syndrome: the importance of prenatal diagnosis." Eur J Obstet Gynecol Reprod Biol **181**: 339-340.
- Novo, A., I. C. Guerra, F. Rocha, S. Gama-de-Sousa, T. Borges, R. Cerqueira, P. Tavares and P. Fonseca (2012). "Kallmann syndrome in a female adolescent: a new mutation in the FGFR1 gene." BMJ Case Rep **2012**.
- Ohtaka, K., Y. Fujisawa, F. Takada, Y. Hasegawa, T. Miyoshi, T. Hasegawa, H. Miyoshi, H. Kameda, M. Kurokawa-Seo, M. Fukami and T. Ogata (2017). "FGFR1 Analyses in Four Patients with Hypogonadotropic Hypogonadism with Split-Hand/Foot Malformation: Implications for the Promoter Region." Hum Mutat **38**(5): 503-506.
- Oliver, J. D., D. C. Menapace and S. A. Cofer (2017). "Otorhinolaryngologic manifestations of Hartsfield syndrome: Case series and review of literature." Int J Pediatr Otorhinolaryngol **98**: 4-8.
- Pandey, R. K., M. Bajpai, A. Ali, S. Gayan and A. Singh (2013). "Mutational identification of fibroblast growth factor receptor 1 and fibroblast growth factor receptor 2 genes in craniosynostosis in Indian population." Indian J Hum Genet **19**(4): 449-453.
- Passos-Bueno, M. R., A. L. Sertie, A. Richieri-Costa, L. G. Alonso, M. Zatz, N. Alonso, D. Brunoni and S. F. Ribeiro (1998). "Description of a new mutation and characterization of FGFR1, FGFR2, and FGFR3 mutations among Brazilian patients with syndromic craniosynostoses." Am J Med Genet **78**(3): 237-241.

Phillips, J. C., R. Braun, W. Wang, J. Gumbart, E. Tajkhorshid, E. Villa, C. Chipot, R. D. Skeel, L. Kale and K. Schulten (2005).

"Scalable molecular dynamics with NAMD." J Comput Chem **26**(16): 1781-1802.

Pitteloud, N., J. S. Acierno, Jr., A. Meysing, A. V. Eliseenkova, J. Ma, O. A. Ibrahimi, D. L. Metzger, F. J. Hayes, A. A. Dwyer, V. A.

Hughes, M. Yialamas, J. E. Hall, E. Grant, M. Mohammadi and W. F. Crowley, Jr. (2006). "Mutations in fibroblast growth factor receptor 1 cause both Kallmann syndrome and normosmic idiopathic hypogonadotropic hypogonadism." Proc Natl Acad Sci U S A **103**(16): 6281-6286.

Pitteloud, N., J. S. Acierno, Jr., A. U. Meysing, A. A. Dwyer, F. J. Hayes and W. F. Crowley, Jr. (2005). "Reversible kallmann syndrome, delayed puberty, and isolated anosmia occurring in a single family with a mutation in the fibroblast growth factor receptor 1 gene." J Clin Endocrinol Metab **90**(3): 1317-1322.

Pitteloud, N., A. Meysing, R. Quinton, J. S. Acierno, Jr., A. A. Dwyer, L. Plummer, E. Fliers, P. Boepple, F. Hayes, S. Seminara, V. A. Hughes, J. Ma, P. Bouloux, M. Mohammadi and W. F. Crowley, Jr. (2006). "Mutations in fibroblast growth factor receptor 1 cause Kallmann syndrome with a wide spectrum of reproductive phenotypes." Mol Cell Endocrinol **254-255**: 60-69.

Pitteloud, N., R. Quinton, S. Pearce, T. Raivio, J. Acierno, A. Dwyer, L. Plummer, V. Hughes, S. Seminara, Y. Z. Cheng, W. P. Li, G. Maccoll, A. V. Eliseenkova, S. K. Olsen, O. A. Ibrahimi, F. J. Hayes, P. Boepple, J. E. Hall, P. Bouloux, M. Mohammadi and W. Crowley (2007). "Digenic mutations account for variable phenotypes in idiopathic hypogonadotropic hypogonadism." J Clin Invest **117**(2): 457-463.

Prasad, R., C. Brewer and C. P. Burren (2016). "Hartsfield syndrome associated with a novel heterozygous missense mutation in FGFR1 and incorporating tumoral calcinosis." Am J Med Genet A.

- Qin, M., C. Gong, Z. Qi, D. Wu, M. Liu, Y. Gu, B. Cao, W. Li and X. Liang (2014). "[Children with idiopathic hypogonadotropic hypogonadism: clinical data analysis and mutations analysis of KAL1 and FGFR1 gene]." Zhonghua Er Ke Za Zhi **52**(12): 942-947.
- Quaynor, S. D., M. E. Bosley, C. G. Duckworth, K. R. Porter, S. H. Kim, H. G. Kim, L. P. Chorch, M. E. Sullivan, J. H. Choi, R. S. Cameron and L. C. Layman (2016). "Targeted next generation sequencing approach identifies eighteen new candidate genes in normosmic hypogonadotropic hypogonadism and Kallmann syndrome." Mol Cell Endocrinol **437**: 86-96.
- Quaynor, S. D., H. G. Kim, E. M. Cappello, T. Williams, L. P. Chorch, D. P. Bick, R. J. Sherins and L. C. Layman (2011). "The prevalence of digenic mutations in patients with normosmic hypogonadotropic hypogonadism and Kallmann syndrome." Fertil Steril **96**(6): 1424-1430 e1426.
- Raivio, T., M. Avbelj, M. J. McCabe, C. J. Romero, A. A. Dwyer, J. Tommiska, G. P. Sykiotis, L. C. Gregory, D. Diaczok, V. Tziaferi, M. W. Elting, R. Padidela, L. Plummer, C. Martin, B. Feng, C. Zhang, Q. Y. Zhou, H. Chen, M. Mohammadi, R. Quinton, Y. Sidis, S. Radovick, M. T. Dattani and N. Pitteloud (2012). "Genetic overlap in Kallmann syndrome, combined pituitary hormone deficiency, and septo-optic dysplasia." J Clin Endocrinol Metab **97**(4): E694-699.
- Raivio, T., J. Falardeau, A. Dwyer, R. Quinton, F. J. Hayes, V. A. Hughes, L. W. Cole, S. H. Pearce, H. Lee, P. Boepple, W. F. Crowley, Jr. and N. Pitteloud (2007). "Reversal of idiopathic hypogonadotropic hypogonadism." N Engl J Med **357**(9): 863-873.
- Raivio, T., Y. Sidis, L. Plummer, H. Chen, J. Ma, A. Mukherjee, E. Jacobson-Dickman, R. Quinton, G. Van Vliet, H. Lavoie, V. A. Hughes, A. Dwyer, F. J. Hayes, S. Xu, S. Sparks, U. B. Kaiser, M. Mohammadi and N. Pitteloud (2009). "Frequency of

Impaired Fibroblast Growth Factor Receptor 1 Signaling as a Cause of Normosmic Idiopathic Hypogonadotropic Hypogonadism." Endocr Rev **30**(7): 934.

Riley, B. M., M. A. Mansilla, J. Ma, S. Daack-Hirsch, B. S. Maher, L. M. Raffensperger, E. T. Russo, A. R. Vieira, C. Dode, M. Mohammadi, M. L. Marazita and J. C. Murray (2007). "Impaired FGF signaling contributes to cleft lip and palate." Proc Natl Acad Sci U S A **104**(11): 4512-4517.

Roscioli, T., G. Elakis, T. C. Cox, D. J. Moon, H. Venselaar, A. M. Turner, T. Le, E. Hackett, E. Haan, A. Colley, D. Mowat, L. Worgan, E. P. Kirk, R. Sachdev, E. Thompson, M. Gabbett, J. McGaughran, K. Gibson, M. Gattas, M. L. Freckmann, J. Dixon, L. Hoefsloot, M. Field, A. Hackett, B. Kamien, M. Edwards, L. C. Ades, F. A. Collins, M. J. Wilson, R. Savarirayan, T. Y. Tan, D. J. Amor, G. McGillivray, S. M. White, I. A. Glass, D. J. David, P. J. Anderson, M. Gianoutsos and M. F. Buckley (2013). "Genotype and clinical care correlations in craniosynostosis: findings from a cohort of 630 Australian and New Zealand patients." Am J Med Genet C Semin Med Genet **163C**(4): 259-270.

Roscioli, T., S. Flanagan, P. Kumar, J. Masel, M. Gattas, V. J. Hyland and I. A. Glass (2000). "Clinical findings in a patient with FGFR1 P252R mutation and comparison with the literature." Am J Med Genet **93**(1): 22-28.

Rossi, M., R. L. Jones, G. Norbury, A. Bloch-Zupan and R. M. Winter (2003). "The appearance of the feet in Pfeiffer syndrome caused by FGFR1 P252R mutation." Clin Dysmorphol **12**(4): 269-274.

Sarfati, J., C. Bouvattier, H. Bry-Gaillard, A. Cartes, J. Bouligand and J. Young (2015). "Kallmann syndrome with FGFR1 and KAL1 mutations detected during fetal life." Orphanet J Rare Dis **10**: 71.

- Sarfati, J., C. Fouveaut, C. Leroy, M. Jeanpierre, J. P. Hardelin and C. Dode (2013). "Greater prevalence of PROKR2 mutations in Kallmann syndrome patients from the Maghreb than in European patients." Eur J Endocrinol **169**(6): 805-809.
- Sato, N., T. Hasegawa, N. Hori, M. Fukami, Y. Yoshimura and T. Ogata (2005). "Gonadotrophin therapy in Kallmann syndrome caused by heterozygous mutations of the gene for fibroblast growth factor receptor 1: report of three families: case report." Hum Reprod **20**(8): 2173-2178.
- Sato, N., N. Katsumata, M. Kagami, T. Hasegawa, N. Hori, S. Kawakita, S. Minowada, A. Shimotsuka, Y. Shishiba, M. Yokozawa, T. Yasuda, K. Nagasaki, D. Hasegawa, Y. Hasegawa, K. Tachibana, Y. Naiki, R. Horikawa, T. Tanaka and T. Ogata (2004). "Clinical assessment and mutation analysis of Kallmann syndrome 1 (KAL1) and fibroblast growth factor receptor 1 (FGFR1, or KAL2) in five families and 18 sporadic patients." J Clin Endocrinol Metab **89**(3): 1079-1088.
- Sato, N., K. Ohyama, M. Fukami, M. Okada and T. Ogata (2006). "Kallmann syndrome: somatic and germline mutations of the fibroblast growth factor receptor 1 gene in a mother and the son." J Clin Endocrinol Metab **91**(4): 1415-1418.
- Schell, U., A. Hehr, G. J. Feldman, N. H. Robin, E. H. Zackai, C. de Die-Smulders, D. H. Viskochil, J. M. Stewart, G. Wolff, H. Ohashi and et al. (1995). "Mutations in FGFR1 and FGFR2 cause familial and sporadic Pfeiffer syndrome." Hum Mol Genet **4**(3): 323-328.
- Shaw, N. D., S. B. Seminara, C. K. Welt, M. G. Au, L. Plummer, V. A. Hughes, A. A. Dwyer, K. A. Martin, R. Quinton, V. Mericq, P. M. Merino, J. F. Gusella, W. F. Crowley, Jr., N. Pitteloud and J. E. Hall (2011). "Expanding the phenotype and genotype of female GnRH deficiency." J Clin Endocrinol Metab **96**(3): E566-576.

- Shi, Y., Z. Xia, J. Zhang, R. Best, C. Wu, J. W. Ponder and P. Ren (2013). "Polarizable atomic multipole-based AMOEBA force field for proteins." Journal of Chemical Theory and Computation **9**(9): 4046-4063.
- Simonis, N., I. Migeotte, N. Lambert, C. Perazzolo, D. C. de Silva, B. Dimitrov, C. Heinrichs, S. Janssens, B. Kerr, G. Mortier, G. Van Vliet, P. Lepage, G. Casimir, M. Abramowicz, G. Smits and C. Vilain (2013). "FGFR1 mutations cause Hartsfield syndrome, the unique association of holoprosencephaly and ectrodactyly." J Med Genet **50**(9): 585-592.
- Sow, A. J., R. Ramli, Z. A. Latiff, S. Ichikawa, A. K. Gray, R. Nordin, M. N. Abd Jabar, S. H. Primuharsa Putra, C. H. Siar and M. J. Econs (2010). "Osteoglophonic dysplasia: A 'common' mutation in a rare disease." Clin Genet **78**(2): 197-198.
- Sykiotis, G. P., L. Plummer, V. A. Hughes, M. Au, S. Durrani, S. Nayak-Young, A. A. Dwyer, R. Quinton, J. E. Hall, J. F. Gusella, S. B. Seminara, W. F. Crowley, Jr. and N. Pitteloud (2010). "Oligogenic basis of isolated gonadotropin-releasing hormone deficiency." Proc Natl Acad Sci U S A **107**(34): 15140-15144.
- Takagi, M., T. Miyoshi, Y. Nagashima, N. Shibata, H. Yagi, R. Fukuzawa and T. Hasegawa (2016). "Novel heterozygous mutation in the extracellular domain of FGFR1 associated with Hartsfield syndrome." Hum Genome Var **3**: 16034.
- Thurman, R. D., K. M. Kathir, D. Rajalingam and T. K. Kumar (2012). "Molecular basis for the Kallmann syndrome-linked fibroblast growth factor receptor mutation." Biochem Biophys Res Commun **425**(3): 673-678.
- Tommiska, J., J. Kansakoski, P. Christiansen, N. Jorgensen, J. G. Lawaetz, A. Juul and T. Raivio (2014). "Genetics of congenital hypogonadotropic hypogonadism in Denmark." Eur J Med Genet **57**(7): 345-348.



- Trarbach, E. B., E. M. Costa, B. Versiani, M. de Castro, M. T. Baptista, H. M. Garmes, B. B. de Mendonca and A. C. Latronico (2006). "Novel fibroblast growth factor receptor 1 mutations in patients with congenital hypogonadotropic hypogonadism with and without anosmia." J Clin Endocrinol Metab **91**(10): 4006-4012.
- UniProt, C. (2015). "UniProt: a hub for protein information." Nucleic Acids Res **43**(Database issue): D204-212.
- Vaaralahti, K., K. Wehkalampi, J. Tommiska, E. M. Laitinen, L. Dunkel and T. Raivio (2011). "The role of gene defects underlying isolated hypogonadotropic hypogonadism in patients with constitutional delay of growth and puberty." Fertil Steril **95**(8): 2756-2758.
- Villanueva, C., E. Jacobson-Dickman, C. Xu, S. Manouvrier, A. A. Dwyer, G. P. Sykiotis, A. Beenken, Y. Liu, J. Tommiska, Y. Hu, D. Tiosano, M. Gerard, J. Leger, V. Drouin-Garraud, H. Lefebvre, M. Polak, J. C. Carel, F. Phan-Hug, M. Hauschild, L. Plummer, J. P. Rey, T. Raivio, P. Bouloux, Y. Sidis, M. Mohammadi, N. de Roux and N. Pitteloud (2015). "Congenital hypogonadotropic hypogonadism with split hand/foot malformation: a clinical entity with a high frequency of FGFR1 mutations." Genet Med **17**(8): 651-659.
- Vizeneuve, A., A. Hilfiger, J. Bouligand, M. Pouillot, S. Brailly-Tabard, A. Bashamboo, K. McElreavey and R. Brauner (2013). "Congenital hypogonadotropic hypogonadism during childhood: presentation and genetic analyses in 46 boys." PLoS One **8**(10): e77827.
- Wang, X. L., D. D. Wang, J. Q. Gu, N. Zhang and Z. Y. Shan (2014). "A female patient with normosmic idiopathic hypogonadotropic hypogonadism carrying a novel mutation in FGFR1." Genet Mol Res **13**(4): 9472-9476.

White, K. E., J. M. Cabral, S. I. Davis, T. Fishburn, W. E. Evans, S. Ichikawa, J. Fields, X. Yu, N. J. Shaw, N. J. McLellan, C.

McKeown, D. Fitzpatrick, K. Yu, D. M. Ornitz and M. J. Econs (2005). "Mutations that cause osteoglophonic dysplasia define novel roles for FGFR1 in bone elongation." Am J Hum Genet **76**(2): 361-367.

Xu, H., Y. Niu, T. Wang, S. Liu, H. Xu, S. Wang, J. Liu and Z. Ye (2015). "Novel FGFR1 and KISS1R Mutations in Chinese Kallmann Syndrome Males with Cleft Lip/Palate." Biomed Res Int **2015**: 649698.

Ye, X., A. Guilmatre, B. Reva, I. Peter, Y. Heuze, J. T. Richtsmeier, D. J. Fox, R. J. Goedken, E. W. Jabs and P. A. Romitti (2016). "Mutation Screening of Candidate Genes in Patients with Nonsyndromic Sagittal Craniosynostosis." Plast Reconstr Surg **137**(3): 952-961.

Zenaty, D., P. Bretones, C. Lambe, I. Guemas, M. David, J. Leger and N. de Roux (2006). "Paediatric phenotype of Kallmann syndrome due to mutations of fibroblast growth factor receptor 1 (FGFR1)." Mol Cell Endocrinol **254-255**: 78-83.

Zhu, J., R. E. Choa, M. H. Guo, L. Plummer, C. Buck, M. R. Palmert, J. N. Hirschhorn, S. B. Seminara and Y. M. Chan (2015). "A shared genetic basis for self-limited delayed puberty and idiopathic hypogonadotropic hypogonadism." J Clin Endocrinol Metab **100**(4): E646-654.
